# Supplementary material for: Psychosis in Alzheimer’s Disease is Associated with Excitatory Neuron Vulnerability and Post-Transcriptional Mechanisms Altering Synaptic Protein Levels
Source: medRxiv preprint, doi:10.1101/2021.09.07.21262904, version 2 (2021-11-11)
Supplement: Supplemental File 1 [file 262904_file04.xlsx]

## Sheet: Read_Me
Legend	Description
Gene Symbol	Human Entrez Gene Symbol
Module	WGCNA Module Assignment
log2FC	Log2(AD-P:AD+P)
p.value	Nominal Significance value
mean_diff_raw	Difference between Log2(AD+P) and Log2(AD-P) without adjustment to any covariate
q.value	False Discovery Rate value

## Sheet: Data_S_01
Gene Symbol	log2FC	p.value	meandiff_raw	q.value
A1BG-AS1	0.221589	0.350823	0.21034	0.939005
A2M	0.098119	0.449642	0.0863461	0.950965
A2M-AS1	0.145359	0.529337	0.27171	0.968991
A2ML1	0.0761905	0.65935	0.0438995	0.978203
A4GALT	-0.0915523	0.744272	-0.0924957	0.981651
AA06	0.184224	0.420609	0.199083	0.943664
AAAS	-0.0540703	0.76576	-0.0711733	0.982772
AACS	-0.2998	0.0358096	-0.237865	0.893964
AADAT	0.209326	0.230063	0.209342	0.927625
AAED1	-0.0861589	0.733702	-0.0642215	0.98024
AAGAB	0.0449813	0.790208	0.0265329	0.98529
AAK1	-0.213641	0.0233612	-0.159835	0.893964
AAMDC	0.271085	0.103348	0.22359	0.893964
AAMP	-0.00286247	0.979523	-0.0608763	0.997685
AANAT	0.308089	0.249095	0.134621	0.934339
AAR2	-0.0353026	0.865021	-0.0496639	0.990757
AARS	-0.0877993	0.292085	-0.0275294	0.939005
AARS2	0.0104069	0.952713	-0.0605269	0.99599
AASDH	0.178882	0.266638	0.152411	0.935637
AASDHPPT	-0.318356	0.147856	-0.278318	0.903293
AASS	0.0937437	0.498068	0.0751957	0.961669
AATBC	0.211772	0.360347	0.176686	0.939005
AATK	0.283854	0.424671	0.228848	0.944485
ABAT	-0.021887	0.672658	-0.00906267	0.978203
ABCA1	-0.00260747	0.983432	-0.0782684	0.997685
ABCA10	-0.0814078	0.683656	-0.0584206	0.978203
ABCA11P	-0.0138054	0.944185	0.0862636	0.99599
ABCA17P	0.146461	0.466185	0.139237	0.956905
ABCA2	0.144955	0.596394	0.174911	0.973864
ABCA3	-0.0788129	0.644738	-0.0267434	0.978203
ABCA4	0.104137	0.676292	-0.0405372	0.978203
ABCA5	-0.126953	0.466528	-0.0724019	0.956905
ABCA6	0.00760789	0.963692	0.063426	0.996483
ABCA7	-0.187364	0.43299	-0.0236328	0.947153
ABCA8	0.457092	0.0297803	0.434619	0.893964
ABCA9	0.0220148	0.867899	0.0953053	0.990757
ABCB1	0.278453	0.0862901	0.25753	0.893964
ABCB10	-0.335992	0.0275626	-0.252057	0.893964
ABCB6	-0.266215	0.0497147	-0.261718	0.893964
ABCB7	-0.0268537	0.864429	-0.0670782	0.990757
ABCB8	-0.154956	0.364601	-0.0975976	0.939005
ABCB9	-0.1118	0.569669	-0.093316	0.970192
ABCC10	-0.315806	0.0967671	-0.178556	0.893964
ABCC12	-0.55515	0.0202861	-0.501307	0.893964
ABCC2	-0.376973	0.0484098	-0.255893	0.893964
ABCC3	-0.280598	0.244655	-0.211364	0.932035
ABCC4	0.00937711	0.949657	-0.0665937	0.99599
ABCC5	-0.115805	0.136976	-0.0861712	0.903293
ABCC8	-0.318601	0.0329467	-0.236803	0.893964
ABCC9	0.142386	0.325772	0.157999	0.939005
ABCD2	0.191595	0.324647	0.210737	0.939005
ABCD3	0.0586212	0.641781	0.0136611	0.978203
ABCD4	-0.190637	0.159038	-0.139904	0.903293
ABCE1	-0.031514	0.88397	-0.00216183	0.993194
ABCF2	-0.121779	0.188218	-0.0735103	0.906212
ABCF3	-0.136811	0.190619	-0.114205	0.907434
ABCG1	-0.0286926	0.744858	-0.0386156	0.981828
ABCG2	0.292771	0.093749	0.238223	0.893964
ABCG4	-0.311874	0.0926313	-0.170501	0.893964
ABCG5	-0.0774704	0.72832	-0.0347736	0.98024
ABCG8	-0.528032	0.00998015	-0.473384	0.848134
ABHD1	-0.366787	0.121914	-0.331079	0.899041
ABHD10	0.0160674	0.930814	0.0593446	0.995961
ABHD11	-0.277325	0.288391	-0.229103	0.939005
ABHD12	-0.253077	0.0172644	-0.137879	0.887229
ABHD12B	-0.68935	0.0130541	-0.772072	0.863481
ABHD13	0.129026	0.472312	0.106536	0.958753
ABHD14A	0.2528	0.16444	0.142318	0.903293
ABHD14B	0.281881	0.168392	0.385195	0.903293
ABHD15	-0.149357	0.574292	-0.195978	0.97146
ABHD17A	0.0327317	0.887118	0.0554523	0.993194
ABHD17B	0.173147	0.173439	0.140287	0.903293
ABHD17C	-0.192101	0.260669	-0.227873	0.935637
ABHD18	-0.0576593	0.746365	-0.145495	0.98208
ABHD2	-0.0623576	0.408591	-0.0652405	0.943289
ABHD3	-0.169664	0.348989	-0.127083	0.939005
ABHD4	-0.0770848	0.731123	-0.098128	0.98024
ABHD5	0.251472	0.0729589	0.188489	0.893964
ABHD6	-0.0518568	0.73909	-0.0812026	0.980708
ABHD8	-0.137701	0.599207	-0.0308943	0.974076
ABI1	0.139164	0.223147	0.062498	0.921922
ABI2	-0.00924322	0.905487	-0.00885064	0.994654
ABI3	0.0938119	0.701666	0.142572	0.978203
ABI3BP	0.186921	0.426575	0.102084	0.945475
ABL1	0.264817	0.140573	0.223637	0.903293
ABL2	0.0767128	0.376522	0.080557	0.939005
ABLIM1	0.091671	0.214145	0.0589697	0.920538
ABLIM2	-0.302768	0.0133165	-0.216494	0.867321
ABLIM3	0.118268	0.331791	0.0969915	0.939005
ABR	0.016953	0.950251	-0.139551	0.99599
ABRACL	0.177766	0.438996	0.0684215	0.947727
ABT1	0.349356	0.0907754	0.434565	0.893964
ABTB1	0.0174916	0.93811	-0.000906371	0.99599
ABTB2	0.0622678	0.802086	0.172792	0.985355
ACAA1	-0.144298	0.35343	-0.117657	0.939005
ACAA2	-0.0169749	0.914467	-0.055322	0.994654
ACACA	0.215147	0.27813	0.0622943	0.939005
ACACB	0.133911	0.497953	0.0586268	0.961669
ACAD10	0.00711633	0.954752	0.0957891	0.99599
ACAD11	0.257297	0.288109	0.282401	0.939005
ACAD8	-0.0777099	0.514554	-0.0282913	0.968401
ACAD9	-0.00992039	0.93948	0.0195709	0.99599
ACADL	0.235267	0.341129	0.221374	0.939005
ACADM	0.110694	0.33258	0.00793114	0.939005
ACADS	-0.163432	0.592696	-0.00724766	0.973864
ACADSB	-0.106306	0.491767	-0.136047	0.960607
ACADVL	-0.0519395	0.677043	-0.0577708	0.978203
ACAN	0.388285	0.0612277	0.437441	0.893964
ACAP1	0.165296	0.588918	0.0133929	0.973864
ACAP2	0.0584612	0.536442	0.0763622	0.968991
ACAP3	-0.131729	0.599829	-0.0264116	0.974076
ACAT1	0.186516	0.28637	0.0874997	0.939005
ACAT2	0.0468691	0.840818	-0.0198851	0.987845
ACBD3	0.189636	0.242692	0.0872288	0.932035
ACBD4	-0.14793	0.537848	-0.0242499	0.968991
ACBD5	0.0175154	0.862719	0.0098734	0.990672
ACBD6	-0.159894	0.364322	-0.13716	0.939005
ACBD7	0.128998	0.462181	0.0547579	0.956277
ACCS	0.0286862	0.900724	0.0744013	0.993996
ACD	0.204741	0.273183	0.185744	0.937868
ACE	0.060039	0.785076	0.133053	0.984719
ACER2	0.142346	0.446285	0.0864248	0.948048
ACER3	0.0117106	0.933523	0.0393671	0.995961
ACHE	-0.353844	0.166712	-0.383931	0.903293
ACIN1	0.0889525	0.336595	0.0752673	0.939005
ACKR1	-0.522366	0.0619525	-0.480283	0.893964
ACKR3	0.147904	0.486978	0.0913851	0.959573
ACKR4	-0.0114713	0.958097	-0.0437573	0.99599
ACLY	0.0105018	0.923015	0.0240364	0.995264
ACMSD	0.109365	0.582581	0.105838	0.973676
ACO1	0.138287	0.259534	0.0984857	0.935637
ACO2	-0.0623754	0.652375	-0.0322385	0.978203
ACOT1	0.0320471	0.882493	0.0421135	0.993141
ACOT11	0.287855	0.200973	0.385322	0.914764
ACOT13	-0.0595588	0.607769	0.0229809	0.974076
ACOT2	-0.133091	0.513692	-0.103508	0.968401
ACOT4	0.0218335	0.930884	0.154054	0.995961
ACOT6	0.152989	0.449168	0.0628135	0.95048
ACOT7	-0.201108	0.221255	0.0107028	0.921922
ACOT8	0.0846916	0.708932	0.138053	0.97869
ACOT9	0.0967885	0.613777	0.032975	0.974351
ACOX1	0.0788434	0.378816	0.0917048	0.939005
ACOX2	0.227431	0.257268	0.111791	0.935637
ACOX3	-0.0703889	0.629508	0.00989083	0.977282
ACP1	0.159219	0.336013	0.17979	0.939005
ACP2	-0.185217	0.241794	-0.146551	0.932035
ACP6	-0.0875812	0.623822	-0.141937	0.976641
ACRC	0.0754139	0.722254	0.0585658	0.98024
ACSBG1	0.0988898	0.636598	0.154248	0.978112
ACSF2	-0.106347	0.587862	-0.211104	0.973864
ACSF3	-0.148134	0.480624	-0.123372	0.959191
ACSL1	0.0278411	0.833403	0.0149273	0.987845
ACSL3	0.106359	0.410177	0.0704418	0.943289
ACSL4	0.0262297	0.908734	-0.00903095	0.994654
ACSL5	0.203799	0.319564	0.270116	0.939005
ACSL6	0.0219894	0.851092	0.0465718	0.989116
ACSM5	0.255927	0.341088	0.164383	0.939005
ACSM6	0.0404393	0.834685	0.0543575	0.987845
ACSS1	0.198514	0.29043	0.151302	0.939005
ACSS2	0.0823937	0.480213	0.159535	0.959191
ACSS3	0.0150525	0.924102	-0.0201139	0.995264
ACTA2	0.00262821	0.990805	-0.00920715	0.998745
ACTA2-AS1	-0.143729	0.462397	-0.0923812	0.956277
ACTB	-0.00199889	0.984692	0.0377604	0.997691
ACTC1	0.198777	0.375055	0.265891	0.939005
ACTG1	0.0630798	0.551082	0.094971	0.968991
ACTG1P20	-0.31907	0.13244	-0.267411	0.903293
ACTG1P4	-0.196645	0.374723	-0.142708	0.939005
ACTL10	-0.275004	0.148497	-0.297304	0.903293
ACTL6A	-0.102986	0.607531	-0.168304	0.974076
ACTL6B	-0.150842	0.458523	-0.0547118	0.955181
ACTN1	-0.226826	0.0724299	-0.158696	0.893964
ACTN2	-0.108403	0.420384	-0.0460599	0.943566
ACTN4	0.189768	0.261641	0.142261	0.935637
ACTR10	0.117155	0.623946	0.0408838	0.976641
ACTR1A	-0.0244928	0.772644	0.00981154	0.982772
ACTR1B	0.016377	0.922169	0.100862	0.995027
ACTR2	-0.0883927	0.490761	-0.113739	0.960393
ACTR3	0.107305	0.49589	0.067054	0.960607
ACTR3B	0.10815	0.540308	0.118816	0.968991
ACTR3C	-0.430434	0.0430715	-0.330329	0.893964
ACTR5	0.00702597	0.965084	-0.00798127	0.99658
ACTR6	0.315386	0.146715	0.254542	0.903293
ACTR8	-0.0661567	0.631901	-0.0860407	0.97775
ACVR1	-0.0335432	0.804483	-0.0382813	0.985355
ACVR1B	-0.114422	0.287906	-0.0618205	0.939005
ACVR1C	0.14596	0.505602	0.0869478	0.965767
ACVR2A	-0.0743144	0.607043	-0.0369065	0.974076
ACVR2B	-0.035947	0.639863	-0.0514437	0.978203
ACVRL1	0.277719	0.307466	0.218458	0.939005
ACYP1	0.21892	0.342021	0.179112	0.939005
ACYP2	-0.473125	0.0230655	-0.329347	0.893964
ADA	-0.286765	0.190002	-0.219492	0.907271
ADAL	0.120646	0.500633	0.0615824	0.962713
ADAM10	0.335307	6.48e-05	0.298832	0.654156
ADAM11	-0.0164013	0.930366	0.0167635	0.995961
ADAM12	0.0845329	0.685812	0.125207	0.978203
ADAM15	0.191366	0.410143	0.182108	0.943289
ADAM17	-0.117688	0.31835	-0.0971353	0.939005
ADAM19	0.083451	0.58267	0.13671	0.973718
ADAM1A	-0.189444	0.327763	-0.240415	0.939005
ADAM20	-0.168219	0.233441	-0.111676	0.928448
ADAM20P1	0.135439	0.591963	0.157457	0.973864
ADAM21	-0.300539	0.211743	-0.253762	0.919732
ADAM22	-0.27196	0.0695609	-0.237738	0.893964
ADAM23	-0.359028	0.0609906	-0.24456	0.893964
ADAM28	0.34163	0.119608	0.297291	0.899041
ADAM33	0.231614	0.375973	0.299508	0.939005
ADAM7	-0.203238	0.354792	-0.11707	0.939005
ADAM8	-0.0350867	0.911044	-0.0110122	0.994654
ADAM9	0.0731436	0.599597	0.0661246	0.974076
ADAMTS1	0.165649	0.440023	0.177486	0.947727
ADAMTS10	-0.0690021	0.76111	-0.049393	0.982772
ADAMTS13	-0.222444	0.2979	-0.0714726	0.939005
ADAMTS14	0.230988	0.40624	0.317542	0.943289
ADAMTS16	0.0281073	0.912962	0.0748996	0.994654
ADAMTS17	0.167451	0.346507	0.0529303	0.939005
ADAMTS18	-0.0894314	0.799155	-0.191128	0.98529
ADAMTS19	0.140023	0.481956	0.0954138	0.959191
ADAMTS2	-0.272426	0.313553	-0.198392	0.939005
ADAMTS3	-0.290856	0.327284	-0.20108	0.939005
ADAMTS4	0.411371	0.167786	0.375929	0.903293
ADAMTS5	-0.256277	0.312273	-0.249701	0.939005
ADAMTS6	0.0926827	0.701303	-0.0143429	0.978203
ADAMTS8	0.10585	0.53583	0.0947237	0.968991
ADAMTS9	0.138672	0.675003	0.189401	0.978203
ADAMTS9-AS1	-0.233921	0.457296	-0.159849	0.954783
ADAMTS9-AS2	0.21711	0.228182	0.144405	0.925713
ADAMTSL1	-0.183448	0.432855	-0.230096	0.947153
ADAMTSL2	-0.00118497	0.997019	0.0503377	0.999801
ADAMTSL3	0.34127	0.0154491	0.292935	0.876736
ADAMTSL4	-0.00810944	0.973755	0.0549134	0.997685
ADAMTSL5	0.355756	0.243194	0.308136	0.932035
ADAP1	0.0358337	0.882614	0.105253	0.993151
ADAP2	0.149094	0.512738	0.124718	0.968118
ADAR	-0.0150842	0.701362	0.0104111	0.978203
ADARB1	-0.132421	0.200827	-0.107345	0.914597
ADARB2	0.0550692	0.73873	0.0321785	0.980708
ADARB2-AS1	-0.0834192	0.701177	-0.0786822	0.978203
ADAT1	-0.108047	0.401856	-0.116197	0.942933
ADAT2	0.039932	0.849025	0.0565559	0.988649
ADCK1	-0.0988621	0.59966	-0.0243702	0.974076
ADCK2	0.167148	0.380358	0.195495	0.939005
ADCK5	-0.211256	0.345245	-0.056264	0.939005
ADCY1	-0.166682	0.0451085	-0.106714	0.893964
ADCY10	-0.019515	0.932047	-0.112636	0.995961
ADCY10P1	0.292722	0.145386	0.23297	0.903293
ADCY2	-8.64e-05	0.999263	-0.0410296	0.999801
ADCY3	0.082976	0.551093	0.105952	0.968991
ADCY4	-0.00293406	0.992427	-0.106861	0.999227
ADCY5	-0.0650932	0.657873	-0.0403557	0.978203
ADCY6	-0.0417008	0.735319	-0.0314009	0.98024
ADCY7	0.0736841	0.586698	0.0900004	0.973864
ADCY8	-0.0453456	0.754759	-0.0796496	0.982772
ADCY9	-0.107761	0.398199	-0.118793	0.941753
ADCYAP1	-0.380869	0.246074	-0.280533	0.932968
ADCYAP1R1	0.0246648	0.844242	0.0184807	0.987845
ADD1	0.0458947	0.451738	0.0404546	0.951985
ADD2	-0.1962	0.0746791	-0.132056	0.893964
ADD3	0.0680702	0.501731	0.0302573	0.963517
ADD3-AS1	0.233634	0.329502	0.155084	0.939005
ADGRA1	-0.327265	0.0364336	-0.218707	0.893964
ADGRA2	0.34486	0.086329	0.226112	0.893964
ADGRA3	0.203858	0.144074	0.177743	0.903293
ADGRB1	-0.0132925	0.963977	0.0636271	0.996577
ADGRB2	-0.315829	0.183629	-0.276115	0.906212
ADGRB3	-0.0849573	0.370712	-0.0737472	0.939005
ADGRD1	0.060843	0.816086	0.0782645	0.986382
ADGRE2	-0.221087	0.387689	-0.197139	0.939005
ADGRE5	-0.102198	0.655188	-0.0911784	0.978203
ADGRF3	-0.246619	0.271737	-0.108648	0.937513
ADGRF5	0.0800709	0.539549	-0.0169659	0.968991
ADGRG1	0.168292	0.51771	0.153842	0.968401
ADGRG2	-0.0693465	0.778134	0.0230329	0.982803
ADGRG6	0.405683	0.174876	0.264472	0.903791
ADGRL1	-0.0746355	0.704962	-0.048063	0.978203
ADGRL2	-0.0467889	0.736218	0.0166372	0.980624
ADGRL3	0.0333643	0.62846	-0.000700679	0.976852
ADGRL4	0.325265	0.193952	0.138698	0.907434
ADGRV1	0.0639607	0.625458	0.0346063	0.976828
ADH1B	0.360072	0.172435	0.447812	0.903293
ADH5	-0.0637223	0.657921	-0.057499	0.978203
ADHFE1	0.510806	0.0266611	0.46945	0.893964
ADI1	-0.120926	0.49767	-0.110731	0.961669
ADIPOR1	0.207142	0.00924707	0.189389	0.840223
ADIPOR2	0.198856	0.0790471	0.127382	0.893964
ADIRF	-0.176148	0.539735	-0.298884	0.968991
ADK	-0.203882	0.257666	-0.180276	0.935637
ADM	0.0357271	0.919052	-0.139142	0.994654
ADNP	0.0210982	0.809209	-0.0200527	0.985355
ADNP-AS1	-0.2321	0.289085	-0.190252	0.939005
ADNP2	-0.0156524	0.914287	-0.0229272	0.994654
ADO	-0.132326	0.443885	-0.168965	0.947727
ADORA1	0.00636329	0.972279	-0.00706354	0.997685
ADORA2A-AS1	-0.0701872	0.777246	-0.188377	0.982772
ADORA2B	0.441212	0.113484	0.308345	0.895406
ADORA3	0.00772286	0.970135	0.00468642	0.997685
ADPGK	0.0352924	0.769361	-0.0441372	0.982772
ADPGK-AS1	-0.0296504	0.888402	-0.102239	0.993628
ADPRH	-0.0637449	0.811271	-0.127014	0.985695
ADPRHL1	-0.12196	0.5102	-0.0146208	0.967326
ADPRHL2	-0.157956	0.464252	-0.116148	0.956386
ADPRM	-0.568352	0.0449035	-0.51738	0.893964
ADRA1A	0.038801	0.700164	0.0284967	0.978203
ADRA1B	-0.118306	0.570479	0.0693687	0.970192
ADRA2A	-0.0623544	0.71847	0.0128136	0.97935
ADRA2C	-0.0224279	0.929743	0.00447337	0.995871
ADRB1	-0.161638	0.385377	-0.17063	0.939005
ADRB2	0.213326	0.257479	0.0851604	0.935637
ADRM1	0.229984	0.293595	0.20368	0.939005
ADSL	-0.290124	0.141841	-0.173373	0.903293
ADSS	0.131512	0.432619	0.040571	0.947153
ADSSL1	0.195835	0.389736	0.136269	0.939005
ADTRP	-0.585678	0.0280338	-0.541712	0.893964
AEBP1	0.132415	0.654837	0.145352	0.978203
AEBP2	0.00717329	0.946279	-0.034199	0.99599
AEN	-0.162369	0.47157	-0.210237	0.958531
AES	-0.0607408	0.634136	-0.071188	0.97775
AFAP1	-0.107579	0.355489	-0.0957928	0.939005
AFAP1-AS1	-0.121432	0.60854	-0.212331	0.974076
AFAP1L1	0.416301	0.050994	0.330879	0.893964
AFAP1L2	-0.000831053	0.99544	0.0167723	0.999481
AFDN	0.0777576	0.223672	0.0719156	0.921922
AFF1	0.12009	0.226842	0.0824601	0.925003
AFF2	-0.0743166	0.700403	-0.0894698	0.978203
AFF3	-0.16837	0.077922	-0.113346	0.893964
AFF4	0.0291967	0.640877	0.0158332	0.978203
AFG3L1P	0.295076	0.0894742	0.296259	0.893964
AFG3L2	0.0792599	0.577249	0.00433077	0.972826
AFMID	0.193583	0.312072	0.12125	0.939005
AFTPH	-0.0499466	0.706319	-0.0827857	0.97869
AGA	0.103129	0.708966	-0.0391888	0.97869
AGAP1	-0.0558566	0.544678	-0.0573627	0.968991
AGAP11	0.19302	0.474316	0.220831	0.958916
AGAP2	-0.136012	0.391254	-0.0886721	0.939005
AGAP3	0.057063	0.727076	0.0821042	0.98024
AGAP4	-0.0258519	0.898141	-0.022486	0.993831
AGAP5	0.227662	0.26048	0.25056	0.935637
AGAP6	-0.079237	0.696782	-0.0814534	0.978203
AGAP9	-0.0445417	0.839699	-0.00366101	0.987845
AGBL1	0.00840825	0.969626	0.0340644	0.997669
AGBL3	-0.10817	0.646054	-0.0410033	0.978203
AGBL4	-0.126282	0.595835	-0.0049285	0.973864
AGBL5	-0.0632613	0.691729	-0.0976561	0.978203
AGFG1	0.00313238	0.975501	-0.00528154	0.997685
AGFG2	-0.169575	0.416326	-0.174622	0.943289
AGGF1	0.0396491	0.746848	-0.017844	0.98208
AGK	-0.0746461	0.765409	-0.161722	0.982772
AGL	0.0106901	0.934392	-0.00166727	0.995961
AGMAT	-0.236566	0.19945	-0.204527	0.912959
AGO1	0.0792591	0.370959	0.0811407	0.939005
AGO2	0.0858439	0.330025	0.0850143	0.939005
AGO3	0.135454	0.0766714	0.0807375	0.893964
AGO4	0.0131778	0.911791	-0.0451919	0.994654
AGPAT2	0.0635896	0.796368	-0.0447558	0.98529
AGPAT3	0.153183	0.171975	0.124116	0.903293
AGPAT4	-0.000729986	0.995068	0.062155	0.999481
AGPAT4-IT1	0.732415	0.00593597	0.612607	0.83425
AGPAT5	0.105879	0.469504	0.0307291	0.958166
AGPS	0.17636	0.145162	0.1113	0.903293
AGRN	0.159734	0.659684	0.150345	0.978203
AGT	0.317825	0.142691	0.29122	0.903293
AGTPBP1	0.140392	0.223569	0.0799751	0.921922
AGTRAP	0.0609025	0.800871	-0.0141478	0.98529
AHCTF1	-0.154842	0.15287	-0.167797	0.903293
AHCTF1P1	-0.131474	0.348972	-0.130802	0.939005
AHCY	0.030047	0.836364	0.0277835	0.987845
AHCYL1	0.119532	0.300422	0.104331	0.939005
AHCYL2	0.0937467	0.29085	0.0109688	0.939005
AHDC1	0.0942751	0.710896	0.126378	0.979112
AHI1	-0.161621	0.227616	-0.0739669	0.925003
AHNAK	0.0265545	0.846118	-0.0217287	0.988191
AHNAK2	-0.167633	0.215549	-0.0435067	0.920553
AHR	0.0453293	0.804171	0.0105809	0.985355
AHRR	0.305932	0.173136	0.320029	0.903293
AHSA1	-0.119569	0.519139	-0.111715	0.968401
AHSA2	0.0891211	0.468658	0.101915	0.957738
AIDA	-0.321517	0.118334	-0.365994	0.896851
AIF1L	0.463245	0.0385215	0.409207	0.893964
AIFM1	0.155278	0.445318	0.185814	0.947727
AIFM2	-0.157433	0.423784	-0.0869175	0.944485
AIFM3	0.229114	0.438205	0.233733	0.947598
AIG1	0.0387681	0.768528	0.0930876	0.982772
AIM1	-0.0391275	0.868166	-0.0969401	0.990757
AIMP1	-0.0359591	0.855299	-0.101998	0.989409
AIMP2	0.0555018	0.806731	0.112322	0.985355
AIP	0.19934	0.333579	0.172056	0.939005
AJAP1	-0.230372	0.00821054	-0.181811	0.83425
AJUBA	0.158679	0.511038	0.0316907	0.96798
AK1	-0.0516707	0.809946	-0.0448545	0.985355
AK2	0.194375	0.155704	0.153797	0.903293
AK3	0.0958025	0.405758	0.0683559	0.943289
AK4	-0.0212507	0.885079	-0.100287	0.993194
AK5	-0.266356	0.158617	-0.201523	0.903293
AK8	0.0657759	0.802791	-0.121974	0.985355
AK9	0.221373	0.118164	0.206472	0.896851
AKAP1	-0.0201835	0.842262	0.0122677	0.987845
AKAP10	0.0844818	0.384202	0.0969499	0.939005
AKAP11	-0.0291343	0.801698	-0.0427742	0.985355
AKAP12	-0.125512	0.0880141	-0.112042	0.893964
AKAP13	0.0165952	0.839342	0.0381681	0.987845
AKAP3	-0.0217517	0.913902	-0.120402	0.994654
AKAP5	-0.217169	0.347575	-0.137747	0.939005
AKAP6	-0.0257973	0.81806	-0.0106412	0.9867
AKAP7	0.159445	0.207195	0.0991614	0.915789
AKAP8	-0.0818467	0.54019	-0.110563	0.968991
AKAP8L	0.0112289	0.920197	0.0329107	0.994654
AKAP9	-0.0919702	0.1937	-0.0785879	0.907434
AKIP1	0.169079	0.43341	0.23683	0.947153
AKIRIN1	-0.0372587	0.710492	-0.0210694	0.979095
AKIRIN2	-0.258412	0.19195	-0.180175	0.907434
AKNA	-0.0534645	0.808733	0.0120224	0.985355
AKR1A1	0.0812519	0.608557	0.116875	0.974076
AKR1B1	-0.149424	0.291721	-0.1104	0.939005
AKR1C1	0.446165	0.0463395	0.441003	0.893964
AKR1C2	0.392418	0.129531	0.215731	0.902775
AKR1C3	0.33538	0.18226	0.277869	0.906212
AKR1E2	-0.04789	0.817363	-0.0720538	0.986382
AKR7A2	0.0511276	0.751375	0.0264986	0.98208
AKR7A2P1	-0.0278364	0.888133	-0.0405205	0.993628
AKR7A3	0.0152898	0.948315	-0.0345682	0.99599
AKR7L	0.143945	0.479893	0.107705	0.959191
AKT1	0.193361	0.359517	0.192056	0.939005
AKT1S1	0.0613873	0.789313	-0.0340302	0.98529
AKT2	0.00418106	0.982741	0.0188904	0.997685
AKT3	-0.119069	0.546478	-0.185723	0.968991
AKTIP	-0.181326	0.168183	-0.112747	0.903293
ALAD	0.0725914	0.596771	0.00337555	0.973949
ALAS1	0.0857416	0.475536	0.133141	0.958916
ALCAM	0.054922	0.665244	0.0807161	0.978203
ALDH16A1	-0.214071	0.390645	-0.128404	0.939005
ALDH18A1	-0.164437	0.184309	-0.131392	0.906212
ALDH1A1	0.174097	0.353478	0.140206	0.939005
ALDH1A3	-0.281467	0.114638	-0.237953	0.895406
ALDH1B1	0.190972	0.374995	0.0909723	0.939005
ALDH1L1	0.0582546	0.798819	0.0704277	0.98529
ALDH1L1-AS2	0.294368	0.119011	0.231559	0.897467
ALDH1L2	0.125086	0.504961	0.0901471	0.965448
ALDH2	0.123121	0.338742	0.138564	0.939005
ALDH3A2	-0.10151	0.348118	-0.0992892	0.939005
ALDH3B1	-0.356763	0.165495	-0.29693	0.903293
ALDH4A1	0.168428	0.586203	0.226132	0.973864
ALDH5A1	-0.235237	0.0110838	-0.224718	0.848134
ALDH6A1	0.0286246	0.797625	-0.0172414	0.98529
ALDH7A1	0.219066	0.079602	0.152772	0.893964
ALDH8A1	-0.516508	0.0262208	-0.525489	0.893964
ALDH9A1	0.197046	0.170121	0.10972	0.903293
ALDOA	-0.0898755	0.522884	-0.0449794	0.968991
ALDOB	0.165056	0.533	0.0152948	0.968991
ALDOC	0.0720574	0.517279	0.059786	0.968401
ALG1	-0.256586	0.253403	-0.204744	0.935637
ALG10	0.0469771	0.82248	0.00129094	0.987199
ALG10B	0.0783735	0.622659	0.0575266	0.975939
ALG11	0.28505	0.300614	0.115521	0.939005
ALG12	-0.017946	0.928335	-0.0392506	0.995528
ALG13	-0.00772764	0.959888	0.0204231	0.996242
ALG14	0.262395	0.186901	0.223805	0.906212
ALG1L9P	-0.159736	0.525817	-0.0992433	0.968991
ALG2	0.135822	0.492138	0.162135	0.960607
ALG3	-0.0774681	0.770514	-0.109938	0.982772
ALG5	0.562894	0.00331283	0.604387	0.83425
ALG6	-0.113226	0.557592	-0.148685	0.969733
ALG8	0.231641	0.204252	0.22191	0.914764
ALG9	0.135227	0.342142	0.120761	0.939005
ALK	0.211465	0.308246	0.295392	0.939005
ALKBH1	0.113612	0.564707	0.0486747	0.970047
ALKBH2	-0.238275	0.180312	-0.190596	0.906212
ALKBH3	0.217688	0.318783	0.123777	0.939005
ALKBH3-AS1	0.311856	0.171403	0.220848	0.903293
ALKBH4	-0.219807	0.386033	-0.103079	0.939005
ALKBH5	0.0560158	0.577996	0.0226787	0.972826
ALKBH6	-0.0610888	0.770709	-0.0333744	0.982772
ALKBH7	0.164989	0.559637	0.213087	0.969733
ALKBH8	-0.146948	0.498021	-0.105259	0.961669
ALMS1	-0.0536891	0.51744	-0.0401736	0.968401
ALMS1P1	0.271281	0.288227	0.188116	0.939005
ALOX12	0.00894596	0.963595	-0.0357425	0.996483
ALOX12-AS1	0.290708	0.208652	0.233117	0.917672
ALOX12P2	0.0057222	0.974771	0.0794733	0.997685
ALOX15B	-0.587133	0.0240848	-0.425817	0.893964
ALOX5AP	-0.245583	0.234179	-0.193522	0.928448
ALPK1	0.297949	0.114703	0.379708	0.895406
ALPK3	0.123137	0.569711	0.154201	0.970192
ALPL	0.0396004	0.874239	0.0468374	0.991212
ALS2	-0.125935	0.238587	-0.0994893	0.931481
ALS2CL	-0.188361	0.349563	-0.13185	0.939005
ALS2CR11	0.175376	0.482138	0.0589943	0.959191
ALS2CR12	0.219106	0.339019	0.132128	0.939005
ALX3	-0.0121595	0.952554	0.0558298	0.99599
ALX4	0.18265	0.416475	0.121786	0.943289
ALYREF	-0.109095	0.528009	-0.0526456	0.968991
AMBRA1	0.112555	0.287513	0.080144	0.939005
AMD1	-0.00486376	0.970377	-0.051149	0.997685
AMDHD2	0.17813	0.480422	0.160156	0.959191
AMER1	0.184014	0.213316	0.0631881	0.920538
AMER2	0.157745	0.141939	0.132494	0.903293
AMER3	-0.314326	0.0454672	-0.248283	0.893964
AMFR	-0.0288156	0.75519	-0.0356017	0.982772
AMIGO1	-0.189029	0.106995	-0.16658	0.893964
AMIGO2	-0.234039	0.290861	-0.241469	0.939005
AMIGO3	0.230775	0.289337	0.2466	0.939005
AMMECR1	0.30966	0.190644	0.295583	0.907434
AMMECR1L	-0.0514542	0.657047	-0.0741428	0.978203
AMN1	0.0311418	0.856382	-0.0204512	0.989751
AMOT	0.19714	0.145999	0.126366	0.903293
AMOTL1	0.0101265	0.918314	0.0303343	0.994654
AMOTL2	0.205453	0.168473	0.224472	0.903293
AMPD2	-0.0325789	0.830842	-0.0566388	0.987845
AMPD3	-0.0546493	0.730733	0.0445506	0.98024
AMPH	-0.304309	0.0738466	-0.241232	0.893964
AMT	0.0465288	0.823541	-0.0586584	0.987215
AMY2B	-0.176362	0.234252	-0.161043	0.928448
AMZ1	0.563124	0.00917087	0.639521	0.840223
AMZ2	0.0664831	0.594181	0.0525565	0.973864
AMZ2P1	0.214105	0.267931	0.0639025	0.935637
ANAPC1	0.158925	0.3017	0.087383	0.939005
ANAPC10	0.076479	0.709049	0.0770439	0.97869
ANAPC11	-0.0116449	0.967192	0.00967123	0.997012
ANAPC13	-0.183931	0.378329	-0.190562	0.939005
ANAPC15	0.098599	0.659466	0.225446	0.978203
ANAPC16	-0.263229	0.0603589	-0.296197	0.893964
ANAPC2	0.0188732	0.930673	0.0931734	0.995961
ANAPC4	-0.02686	0.871258	0.0278328	0.990757
ANAPC5	-0.0373989	0.646625	-0.00404136	0.978203
ANAPC7	-0.0830097	0.576049	-0.0140062	0.972288
ANGEL1	-0.14649	0.140012	-0.107935	0.903293
ANGEL2	0.00498643	0.966511	-0.0133126	0.996908
ANGPT1	0.439856	0.0564335	0.306766	0.893964
ANGPT2	0.163515	0.479591	0.0511596	0.959191
ANGPTL1	-0.065857	0.766748	-0.160787	0.982772
ANGPTL2	0.105572	0.538963	0.111449	0.968991
ANGPTL3	-0.185101	0.415003	-0.115058	0.943289
ANGPTL4	0.195463	0.551769	0.177889	0.969038
ANGPTL7	-0.424324	0.0402208	-0.275489	0.893964
ANK1	-0.104916	0.484064	-0.00923038	0.959191
ANK2	-0.143181	0.280141	-0.095521	0.939005
ANK3	-0.0686953	0.529989	-0.0325436	0.968991
ANKAR	0.0122764	0.936234	0.0158987	0.995961
ANKDD1A	0.110407	0.518075	0.135807	0.968401
ANKDD1B	-0.273684	0.145193	-0.323028	0.903293
ANKEF1	0.228167	0.357736	0.181283	0.939005
ANKFN1	0.175554	0.451151	0.15413	0.951949
ANKFY1	0.0130996	0.844479	0.0364862	0.987845
ANKH	-0.109089	0.0832867	-0.0698553	0.893964
ANKHD1	0.0233457	0.926692	-0.0428619	0.995264
ANKIB1	0.112542	0.161397	0.0852129	0.903293
ANKK1	0.371097	0.088339	0.324341	0.893964
ANKLE1	0.381376	0.0821438	0.319153	0.893964
ANKLE2	0.105012	0.263151	0.116671	0.935637
ANKMY1	0.28912	0.166866	0.180847	0.903293
ANKMY2	0.233967	0.223704	0.197533	0.921922
ANKRA2	0.223617	0.320172	0.12211	0.939005
ANKRD10	-0.147358	0.146861	-0.091819	0.903293
ANKRD11	-0.0369094	0.800354	-0.027232	0.98529
ANKRD12	-0.0219547	0.764555	-0.035075	0.982772
ANKRD13A	0.083302	0.560779	0.0856839	0.969733
ANKRD13B	-0.0362814	0.841598	-0.0302328	0.987845
ANKRD13C	-0.181052	0.120365	-0.165941	0.899041
ANKRD13D	-0.160499	0.556052	-0.0793869	0.969733
ANKRD16	-0.284868	0.121828	-0.186299	0.899041
ANKRD17	-0.00528886	0.926191	-0.00461952	0.995264
ANKRD18A	0.153486	0.532072	0.0946439	0.968991
ANKRD18B	-0.0784915	0.67068	-0.0828394	0.978203
ANKRD19P	-0.173445	0.222381	-0.142403	0.921922
ANKRD20A1	0.184707	0.36989	0.236831	0.939005
ANKRD20A4	-0.0693214	0.738864	0.0370272	0.980708
ANKRD20A5P	-0.192811	0.424505	-0.127069	0.944485
ANKRD23	-0.019147	0.929984	-0.0234031	0.995941
ANKRD24	-0.340825	0.10444	-0.195937	0.893964
ANKRD26	0.0033523	0.97191	0.00754622	0.997685
ANKRD26P3	0.371086	0.150728	0.346588	0.903293
ANKRD27	-0.021879	0.767776	0.0462763	0.982772
ANKRD28	0.0271008	0.77102	0.0410472	0.982772
ANKRD29	-0.15275	0.349757	-0.13351	0.939005
ANKRD30B	-0.195069	0.388131	-0.0545402	0.939005
ANKRD30BL	-0.476395	0.0543686	-0.346224	0.893964
ANKRD31	-0.523299	0.038301	-0.419638	0.893964
ANKRD33B	-0.133141	0.116307	-0.116304	0.895406
ANKRD34A	0.063585	0.751521	0.168031	0.982186
ANKRD34C	-0.120207	0.627443	-0.0947521	0.976828
ANKRD35	-0.0730019	0.742627	-0.0088491	0.981274
ANKRD36	0.0663187	0.509623	0.0611567	0.966988
ANKRD36B	-0.109721	0.438131	-0.0670352	0.947598
ANKRD36BP1	0.0667475	0.731957	-0.00484268	0.98024
ANKRD36BP2	-0.0333687	0.842269	-0.0385764	0.987845
ANKRD36C	-0.0542528	0.565621	-0.0555021	0.970047
ANKRD37	0.135514	0.621226	0.104152	0.975524
ANKRD39	0.0546488	0.795641	0.0931097	0.98529
ANKRD40	0.170662	0.353129	0.107186	0.939005
ANKRD42	-0.188204	0.161499	-0.126194	0.903293
ANKRD44	0.161131	0.179411	0.134045	0.906212
ANKRD44-IT1	-0.0127299	0.95464	-0.115408	0.99599
ANKRD45	-0.113066	0.585424	-0.101045	0.973864
ANKRD46	-0.111106	0.533792	-0.0737297	0.968991
ANKRD49	0.28632	0.181139	0.21184	0.906212
ANKRD50	0.161797	0.202955	0.117876	0.914764
ANKRD52	-0.0265799	0.81278	-0.0153647	0.985717
ANKRD53	0.368186	0.109825	0.336408	0.893964
ANKRD54	-0.105211	0.522713	-0.0454368	0.968991
ANKRD55	-0.112081	0.55608	-0.0609739	0.969733
ANKRD6	0.0889579	0.504817	0.0740446	0.965448
ANKRD61	0.0833369	0.716645	0.0929908	0.97935
ANKRD62	-0.364402	0.155888	-0.354107	0.903293
ANKRD62P1-PARP4P3	0.0745031	0.708923	0.111411	0.97869
ANKRD65	0.176229	0.532948	0.2602	0.968991
ANKRD7	0.319849	0.146344	0.216252	0.903293
ANKRD9	0.0677929	0.806031	0.173752	0.985355
ANKS1A	-0.0155157	0.920503	-0.0335892	0.994654
ANKS1B	-0.145743	0.0751163	-0.131781	0.893964
ANKS3	0.0251964	0.895572	0.087173	0.993831
ANKS6	-0.135939	0.206423	-0.0778107	0.914764
ANKZF1	-0.00652902	0.959107	0.0337872	0.99599
ANLN	0.407328	0.0481681	0.362778	0.893964
ANO1	-0.262292	0.259194	-0.335518	0.935637
ANO10	-0.0492265	0.727146	0.0168806	0.98024
ANO2	0.302171	0.217898	0.252345	0.921922
ANO3	-0.496731	0.082167	-0.359335	0.893964
ANO4	0.338276	0.0128224	0.331914	0.855533
ANO5	-0.099523	0.469184	-0.0521781	0.958166
ANO6	0.202331	0.116037	0.150211	0.895406
ANO7	-0.169275	0.445032	-0.13423	0.947727
ANO8	-0.0831715	0.654381	0.0338167	0.978203
ANOS1	0.0438799	0.824717	0.0112324	0.987215
ANP32A	0.201178	0.0820785	0.228224	0.893964
ANP32A-IT1	-0.126667	0.523646	-0.0658354	0.968991
ANP32AP1	0.189714	0.398323	0.185949	0.941753
ANP32B	0.604776	0.0162824	0.573124	0.876736
ANP32C	-0.234592	0.194924	-0.22668	0.907434
ANP32E	0.200055	0.241313	0.09961	0.932035
ANPEP	-0.0830443	0.797296	-0.0503296	0.98529
ANTXR1	0.200842	0.105653	0.123676	0.893964
ANTXR2	-0.0331367	0.878378	-0.088377	0.992883
ANXA1	0.0850509	0.698151	0.0705065	0.978203
ANXA11	-0.0263363	0.811012	-0.0207822	0.98554
ANXA2	0.238046	0.307035	0.183374	0.939005
ANXA2P1	0.114043	0.643226	0.131062	0.978203
ANXA2P2	0.515494	0.025326	0.499541	0.893964
ANXA3	0.243379	0.253677	0.197086	0.935637
ANXA4	0.334512	0.0611096	0.366634	0.893964
ANXA5	0.0484987	0.657594	0.0356817	0.978203
ANXA6	-0.216311	0.122359	-0.179421	0.899041
ANXA7	-0.0130682	0.921109	-0.0282831	0.994676
ANXA9	0.00202658	0.993856	-0.090848	0.999394
AOAH	0.0871447	0.698085	0.108104	0.978203
AOC2	0.2282	0.330667	0.278951	0.939005
AOC3	-0.304467	0.0957578	-0.30041	0.893964
AOX1	0.186532	0.488298	0.218255	0.95962
AP1AR	-0.176117	0.400003	-0.146644	0.94283
AP1B1	-0.012559	0.938693	-0.000626686	0.99599
AP1G1	0.0824271	0.38833	0.0534349	0.939005
AP1G2	-0.248842	0.182177	-0.170188	0.906212
AP1M1	-0.0917751	0.545806	-0.0281419	0.968991
AP1S1	-0.247489	0.0539422	-0.219816	0.893964
AP1S2	-0.0437523	0.819328	0.0148056	0.986791
AP1S3	-0.130271	0.581005	0.0106961	0.973486
AP2A1	-0.0940453	0.617739	-0.105959	0.974474
AP2A2	-0.236465	0.312491	-0.249654	0.939005
AP2B1	0.0582573	0.359521	0.0355914	0.939005
AP2M1	-0.086967	0.31231	-0.0890001	0.939005
AP2S1	0.140297	0.401712	0.0798601	0.942933
AP3B1	-0.0347464	0.79446	-0.0168162	0.98529
AP3B2	-0.183781	0.125483	-0.0886241	0.900985
AP3D1	0.0256799	0.854416	0.0512751	0.989352
AP3M1	0.0369089	0.785397	-0.00402303	0.984719
AP3M2	-0.283868	0.086924	-0.225273	0.893964
AP3S1	0.0142133	0.943382	0.00196613	0.99599
AP4B1	0.147677	0.488266	0.0539725	0.95962
AP4E1	0.176055	0.27177	0.099024	0.937513
AP4M1	0.362414	0.127566	0.379473	0.902167
AP4S1	-0.146454	0.220965	-0.086984	0.921922
AP5B1	0.0554303	0.72539	0.0734115	0.98024
AP5M1	-0.0821533	0.531914	-0.0840533	0.968991
AP5S1	-0.0953125	0.639625	-0.206053	0.978203
AP5Z1	0.0125009	0.961271	0.171357	0.996461
APAF1	0.101332	0.331845	0.120281	0.939005
APBA1	0.394197	0.0849632	0.359421	0.893964
APBA2	0.290833	0.243508	0.134275	0.932035
APBA3	-0.0498653	0.854283	-0.0775088	0.989352
APBB1	-0.092038	0.46483	-0.0404456	0.956386
APBB1IP	0.0211363	0.927994	0.00199009	0.995528
APBB2	0.179657	0.0346409	0.148849	0.893964
APBB3	-0.159255	0.3421	-0.0389842	0.939005
APC	-0.00311802	0.965008	-0.00284666	0.99658
APC2	0.0859583	0.792495	0.148172	0.98529
APCDD1	0.158732	0.422222	0.104236	0.944485
APEH	-0.0220414	0.869415	0.0485686	0.990757
APEX1	0.176688	0.220525	0.177603	0.921922
APEX2	0.47262	0.0554857	0.344714	0.893964
APH1A	0.460407	0.00879795	0.339516	0.83425
APH1B	-0.0853213	0.5218	-0.0913624	0.968991
API5	-0.102411	0.468111	-0.134336	0.957719
APIP	-0.0126363	0.957812	-0.015227	0.99599
APLF	0.237035	0.196233	0.098183	0.908551
APLN	0.354705	0.161143	0.314061	0.903293
APLNR	0.370057	0.234229	0.337732	0.928448
APLP1	-0.0143824	0.916105	0.0262934	0.994654
APLP2	-0.0448368	0.520409	-0.0474063	0.968991
APMAP	0.0190057	0.861448	-0.0547986	0.990672
APOA1-AS	-0.0531592	0.778186	-0.0379399	0.982803
APOBEC4	0.0206448	0.944829	-0.0572323	0.99599
APOC1	0.0627118	0.800207	0.128147	0.98529
APOD	0.215184	0.179969	0.141001	0.906212
APOE	0.194588	0.498543	0.15071	0.961981
APOL1	0.143733	0.589006	0.0935387	0.973864
APOL2	-0.116538	0.254771	-0.0706166	0.935637
APOL3	0.427406	0.0468439	0.305951	0.893964
APOL6	0.358963	0.0819897	0.302456	0.893964
APOLD1	0.182239	0.411873	0.113515	0.943289
APOO	-0.181532	0.44935	-0.143522	0.95048
APOOL	0.113551	0.384359	0.0571771	0.939005
APOPT1	0.0476946	0.805145	0.0154135	0.985355
APP	-0.147892	0.251398	-0.106449	0.934339
APPBP2	-0.109163	0.390547	-0.106909	0.939005
APPL1	0.0949819	0.337111	0.088295	0.939005
APPL2	0.0514544	0.561418	0.0274834	0.969733
APRT	0.296191	0.220451	0.122941	0.921922
APTR	0.267225	0.190219	0.188398	0.907271
APTX	0.0280977	0.865379	0.0263713	0.990757
AQP1	0.410784	0.114114	0.284743	0.895406
AQP11	-0.316509	0.122702	-0.265792	0.899041
AQP4	0.087037	0.556968	0.0726761	0.969733
AQP4-AS1	-0.0112021	0.955454	-0.085225	0.99599
AQP9	-0.0928671	0.736379	-0.201565	0.980624
AQR	0.0565829	0.654742	0.0426429	0.978203
AR	0.211247	0.294206	0.24879	0.939005
ARAF	-0.110748	0.484459	-0.130208	0.959191
ARAP1	-0.0207241	0.929005	-0.00386041	0.995566
ARAP2	0.203101	0.0272508	0.16706	0.893964
ARAP3	0.101363	0.67236	0.000247118	0.978203
ARC	0.0191047	0.946325	0.0630818	0.99599
ARCN1	0.0127224	0.902536	0.0326052	0.994358
AREL1	-0.0676859	0.5372	-0.0365839	0.968991
ARF1	-0.11182	0.309336	-0.0714942	0.939005
ARF3	-0.0275051	0.626044	-0.0328463	0.976828
ARF4	-0.0924671	0.53556	-0.122043	0.968991
ARF5	0.129797	0.377184	0.111764	0.939005
ARF6	0.166777	0.240467	0.159613	0.932035
ARFGAP1	-0.0341621	0.88136	0.0742281	0.992883
ARFGAP2	-0.0341368	0.714628	-0.0199073	0.97935
ARFGAP3	0.103535	0.41862	0.137906	0.943358
ARFGEF1	-0.108837	0.216967	-0.0935152	0.921922
ARFGEF2	-0.0175009	0.844153	-0.0140441	0.987845
ARFGEF3	-0.0871083	0.246739	-0.0734177	0.933776
ARFIP1	0.00818946	0.963912	0.00551679	0.996577
ARFIP2	0.033142	0.821416	0.0545534	0.986867
ARFRP1	-0.278915	0.200688	-0.139082	0.914416
ARG2	-0.0941196	0.497219	-0.0352981	0.961483
ARGFXP2	-0.1169	0.511296	-0.0466336	0.968118
ARGLU1	0.0428926	0.597366	0.00514516	0.974076
ARHGAP1	-0.136108	0.385846	-0.0759416	0.939005
ARHGAP10	-0.18114	0.241401	-0.282048	0.932035
ARHGAP12	-0.0485104	0.619575	-0.0793308	0.97504
ARHGAP15	-0.393606	0.0833603	-0.400114	0.893964
ARHGAP17	0.0858919	0.495329	-0.00672725	0.960607
ARHGAP18	-0.245655	0.178829	-0.151237	0.906212
ARHGAP19	-0.0314163	0.882333	-0.108062	0.993141
ARHGAP20	-0.155187	0.427561	-0.0896965	0.94599
ARHGAP21	0.0378123	0.620542	0.0280249	0.975389
ARHGAP22	0.0382501	0.856202	0.0661714	0.989715
ARHGAP23	0.342137	0.2117	0.343577	0.919732
ARHGAP24	-0.220167	0.149914	-0.198077	0.903293
ARHGAP25	0.0451966	0.848866	-0.0393399	0.988649
ARHGAP26	-0.134251	0.0247008	-0.133489	0.893964
ARHGAP26-AS1	0.111139	0.619668	0.115664	0.97504
ARHGAP26-IT1	-0.0617942	0.789464	0.0611636	0.98529
ARHGAP28	-0.33681	0.0889188	-0.327128	0.893964
ARHGAP29	0.300293	0.0280519	0.281717	0.893964
ARHGAP30	0.279903	0.18221	0.238502	0.906212
ARHGAP31	0.252643	0.176133	0.234761	0.904842
ARHGAP32	-0.057224	0.520545	-0.0210294	0.968991
ARHGAP33	0.012235	0.959129	0.0384824	0.99599
ARHGAP35	0.00760084	0.928866	-0.0132228	0.995528
ARHGAP39	-0.293791	0.209571	-0.253131	0.919043
ARHGAP4	0.380778	0.138732	0.363997	0.903293
ARHGAP42	0.154278	0.367819	0.0949093	0.939005
ARHGAP44	-0.270339	0.0162557	-0.22742	0.876736
ARHGAP45	-0.263543	0.376242	-0.301275	0.939005
ARHGAP5	0.0642028	0.471438	0.00603616	0.958531
ARHGAP5-AS1	0.180992	0.429554	0.0726991	0.94667
ARHGAP6	0.253703	0.185113	0.176184	0.906212
ARHGAP9	-0.12349	0.570819	-0.0243259	0.970192
ARHGDIA	0.0136215	0.958797	0.0150603	0.99599
ARHGDIB	-0.151181	0.557356	-0.144458	0.969733
ARHGDIG	0.0786136	0.718738	0.118335	0.97935
ARHGEF1	0.0305669	0.915601	-0.0454422	0.994654
ARHGEF10L	-0.0190851	0.938736	0.0298642	0.99599
ARHGEF11	-0.135107	0.176181	-0.101808	0.904842
ARHGEF12	-0.0298946	0.583733	-0.0504205	0.973864
ARHGEF15	0.238292	0.33521	0.203448	0.939005
ARHGEF17	-0.0696589	0.70794	-0.0488785	0.97869
ARHGEF18	-0.077098	0.666491	-0.0221064	0.978203
ARHGEF2	-0.0299741	0.792218	-0.0183142	0.98529
ARHGEF25	-0.426739	0.000170509	-0.392405	0.654156
ARHGEF26	0.324564	0.142134	0.231745	0.903293
ARHGEF26-AS1	-0.0439485	0.818406	-0.138742	0.9867
ARHGEF28	-0.341612	0.0538775	-0.303417	0.893964
ARHGEF3	-0.31805	0.102037	-0.251359	0.893964
ARHGEF33	-0.0376731	0.852368	-0.0546594	0.989116
ARHGEF37	0.265965	0.203495	0.181954	0.914764
ARHGEF4	0.0768023	0.676216	0.0646127	0.978203
ARHGEF40	0.216138	0.35136	0.198718	0.939005
ARHGEF6	-0.107513	0.294127	-0.125934	0.939005
ARHGEF7	-0.107581	0.108785	-0.0814956	0.893964
ARHGEF9	-0.129048	0.267335	-0.107462	0.935637
ARID1A	0.209729	0.0509292	0.149257	0.893964
ARID1B	0.0364965	0.616255	0.0492977	0.974351
ARID2	0.160984	0.133438	0.106546	0.903293
ARID3A	-0.476262	0.0769208	-0.370231	0.893964
ARID3B	0.0156692	0.946057	-0.00666145	0.99599
ARID4A	0.210158	0.0297034	0.114295	0.893964
ARID4B	0.108119	0.189388	0.086728	0.906212
ARID5A	-0.0372206	0.895667	-0.0390383	0.993831
ARID5B	-0.0742652	0.445294	-0.0220556	0.947727
ARIH1	0.00513729	0.957239	0.0216428	0.99599
ARIH2	-0.0153694	0.864389	-0.0221454	0.990757
ARL1	0.0858078	0.621021	0.0240184	0.975524
ARL10	0.0601621	0.641498	0.0517102	0.978203
ARL13A	-0.125706	0.474967	-0.0372641	0.958916
ARL13B	0.358901	0.0715755	0.333885	0.893964
ARL14EP	0.0304217	0.8404	-0.0240569	0.987845
ARL15	-0.228042	0.305003	-0.154207	0.939005
ARL16	0.00135288	0.994456	0.0183357	0.99946
ARL2	-0.0194351	0.934625	0.0131352	0.995961
ARL2BP	0.0210235	0.873068	-0.0488313	0.991212
ARL3	-0.213039	0.0839019	-0.192172	0.893964
ARL4A	0.0414461	0.854945	0.0322604	0.989352
ARL4C	-0.0316251	0.832305	-0.0609951	0.987845
ARL4D	0.0196841	0.919863	-0.00834013	0.994654
ARL5A	0.167024	0.166071	0.0378034	0.903293
ARL5B	0.145559	0.363795	0.0511431	0.939005
ARL6	-0.163315	0.473283	-0.108264	0.958916
ARL6IP1	-0.0460774	0.719855	-0.087495	0.979914
ARL6IP4	-0.0278591	0.886897	-0.0400157	0.993194
ARL6IP5	-0.104873	0.545261	-0.0767491	0.968991
ARL6IP6	0.209051	0.335857	0.0864343	0.939005
ARL8A	0.124579	0.354395	0.0845708	0.939005
ARL8B	-0.066925	0.621568	-0.0107264	0.975814
ARMC1	0.0370384	0.809241	-0.0276815	0.985355
ARMC10	-0.00308191	0.988344	-0.0176487	0.998429
ARMC2	0.0650193	0.588294	0.0356073	0.973864
ARMC2-AS1	-0.400893	0.048539	-0.336651	0.893964
ARMC3	0.0595503	0.812855	-0.067146	0.985717
ARMC5	-0.108994	0.644444	-0.0724706	0.978203
ARMC6	0.062146	0.794018	0.177312	0.98529
ARMC7	-0.0458449	0.814164	-0.139015	0.985831
ARMC8	0.0015734	0.987217	0.0252488	0.998428
ARMC9	-0.244756	0.0429195	-0.141513	0.893964
ARMCX1	0.0236415	0.901673	0.116632	0.994318
ARMCX2	-0.009293	0.943259	0.0186512	0.99599
ARMCX3	0.052364	0.606995	0.0415896	0.974076
ARMCX4	-0.0365902	0.751315	-0.0237413	0.98208
ARMCX5	-0.215975	0.357267	-0.301006	0.939005
ARMCX5-GPRASP2	-0.161181	0.380664	-0.163522	0.939005
ARMCX6	-0.218937	0.326543	-0.283867	0.939005
ARMT1	-0.0572879	0.807185	-0.075299	0.985355
ARNT	0.0357249	0.724818	0.0141028	0.98024
ARNT2	-0.0878378	0.180265	-0.110211	0.906212
ARNTL	-0.204509	0.0913087	-0.198718	0.893964
ARNTL2	-0.183365	0.234159	-0.104513	0.928448
ARPC1A	-0.0232527	0.797508	-0.0354077	0.98529
ARPC1B	8.71e-05	0.999754	-0.0160094	0.999849
ARPC2	-0.0488677	0.662601	0.00906382	0.978203
ARPC3	0.0131654	0.936559	-0.0280954	0.995961
ARPC4	-0.076404	0.609215	-0.116903	0.974076
ARPC5	0.223739	0.0443917	0.206256	0.893964
ARPC5L	0.13706	0.455953	0.10749	0.953545
ARPIN	-0.0709983	0.66706	-0.0928711	0.978203
ARPP19	0.0435226	0.582311	0.0224439	0.973648
ARPP21	-0.142264	0.256427	-0.0853612	0.935637
ARR3	0.0630513	0.734988	0.11296	0.98024
ARRB1	-0.00349587	0.973802	-0.0247373	0.997685
ARRB2	-0.0736781	0.540058	-0.00657593	0.968991
ARRDC1	0.108858	0.662707	0.217172	0.978203
ARRDC1-AS1	-0.0399662	0.854847	-0.0534912	0.989352
ARRDC2	0.369942	0.104684	0.237068	0.893964
ARRDC3	0.0646174	0.680968	0.0200545	0.978203
ARRDC4	0.305583	0.115582	0.20461	0.895406
ARSA	0.175192	0.412292	0.208722	0.943289
ARSB	0.0945025	0.531047	0.114669	0.968991
ARSD	0.143917	0.520328	0.0906875	0.968991
ARSE	-0.0223117	0.919538	-0.178526	0.994654
ARSG	-0.108683	0.527993	-0.080326	0.968991
ARSI	-0.0540158	0.768688	-0.00604679	0.982772
ARSJ	-0.187892	0.374387	-0.0590081	0.939005
ARSK	0.0620437	0.778326	-0.0489787	0.982822
ART3	-0.165074	0.439988	-0.162984	0.947727
ARTN	0.0963616	0.59897	0.0835218	0.974076
ARV1	0.0152432	0.943759	0.0127057	0.99599
ARVCF	-0.0367627	0.886839	-0.0388198	0.993194
ARX	0.201245	0.304225	0.156073	0.939005
ASAH1	-0.100954	0.376254	-0.108402	0.939005
ASAH2B	0.0482031	0.860719	0.17381	0.990672
ASAP1	-0.0246374	0.744132	-0.0324824	0.981651
ASAP1-IT1	0.0860726	0.609293	0.0905004	0.974076
ASAP1-IT2	-0.211563	0.362646	-0.212404	0.939005
ASAP2	0.0769402	0.370273	0.0598195	0.939005
ASAP3	0.0202637	0.913796	0.0769012	0.994654
ASB1	0.02924	0.805627	0.0242217	0.985355
ASB13	0.0582526	0.775548	0.00258374	0.982772
ASB14	-0.00011482	0.999557	0.0584897	0.999849
ASB16	-0.103611	0.709383	-0.121718	0.978733
ASB16-AS1	-0.257882	0.24433	-0.154636	0.932035
ASB3	-0.331423	0.1677	-0.342916	0.903293
ASB4	-0.204737	0.450154	-0.21967	0.951286
ASB6	0.234371	0.148694	0.209945	0.903293
ASB7	-0.0371762	0.852008	0.0175746	0.989116
ASB8	-0.245494	0.067902	-0.20938	0.893964
ASB9P1	0.100457	0.518956	-0.0614312	0.968401
ASCC1	0.0425651	0.772419	-0.00463782	0.982772
ASCC2	0.093724	0.612626	0.114019	0.974351
ASCC3	0.0124171	0.896165	0.0452549	0.993831
ASCL1	0.861275	0.00100465	0.707681	0.83425
ASF1A	-0.0162935	0.932755	0.0121677	0.995961
ASGR1	0.208502	0.35202	0.190454	0.939005
ASH1L	-0.0225042	0.678594	-0.0422699	0.978203
ASH1L-AS1	0.196138	0.370929	0.245525	0.939005
ASH2L	-0.187643	0.221345	-0.195308	0.921922
ASIC1	0.0596413	0.689866	0.116503	0.978203
ASIC2	-0.116861	0.490961	-0.0230883	0.960393
ASIC3	-0.269986	0.230457	-0.210152	0.927625
ASIC4	0.0246621	0.918664	0.00602325	0.994654
ASL	0.236771	0.308475	0.296924	0.939005
ASNA1	-0.189117	0.256857	-0.172078	0.935637
ASNS	-0.212048	0.305126	-0.105294	0.939005
ASNSD1	-0.0278225	0.87124	0.0190538	0.990757
ASPA	0.405522	0.0844384	0.376546	0.893964
ASPDH	0.281226	0.324375	0.215346	0.939005
ASPH	0.114007	0.225944	0.0504335	0.924624
ASPHD1	0.147919	0.6164	0.210402	0.974351
ASPHD2	-0.11449	0.599753	-0.00774211	0.974076
ASPM	-0.138728	0.500445	-0.185452	0.962713
ASPN	-0.156117	0.391166	-0.24353	0.939005
ASPRV1	0.354304	0.0920627	0.399043	0.893964
ASPSCR1	0.0226045	0.924249	0.0481858	0.995264
ASRGL1	0.143268	0.344153	0.153961	0.939005
ASS1	-0.331408	0.0587902	-0.345447	0.893964
ASTE1	-0.0697287	0.736429	0.0101805	0.980624
ASTN1	-0.0163823	0.808549	-0.019916	0.985355
ASTN2	-0.0804368	0.462384	-0.026708	0.956277
ASTN2-AS1	-0.0203505	0.910972	-0.0220157	0.994654
ASUN	0.164922	0.380622	0.0836523	0.939005
ASXL1	0.0169749	0.804256	0.0403495	0.985355
ASXL2	-0.0247866	0.785192	-0.0108985	0.984719
ASXL3	0.0710595	0.535809	0.0871356	0.968991
ATAD1	0.00836956	0.956457	0.0131695	0.99599
ATAD2	0.113539	0.498034	0.0105737	0.961669
ATAD2B	-0.0458135	0.640605	-0.0688996	0.978203
ATAD3A	0.357974	0.186891	0.209856	0.906212
ATAD3B	0.226167	0.305356	0.199601	0.939005
ATAD3C	-0.292159	0.20765	-0.256962	0.916743
ATAD5	-0.10193	0.573127	-0.0887004	0.970947
ATCAY	-0.200321	0.0336319	-0.181195	0.893964
ATE1	-0.0766414	0.403051	-0.0985452	0.943289
ATE1-AS1	0.308297	0.197531	0.130232	0.910096
ATF1	-0.193129	0.307464	-0.148155	0.939005
ATF2	-0.0494267	0.693291	-0.0351189	0.978203
ATF3	0.235525	0.416539	0.221434	0.943289
ATF4	-0.00861077	0.949207	-0.0495616	0.99599
ATF5	-0.299898	0.189612	-0.258662	0.906423
ATF6	0.00747437	0.933958	-0.039795	0.995961
ATF7	0.125733	0.299488	0.0428769	0.939005
ATF7IP	0.0982024	0.223186	0.103704	0.921922
ATF7IP2	-0.256665	0.138087	-0.245592	0.903293
ATG10	0.194968	0.319257	0.09474	0.939005
ATG101	0.158521	0.367114	0.141199	0.939005
ATG12	-0.217905	0.0803242	-0.156536	0.893964
ATG13	-0.0345697	0.686804	-0.051672	0.978203
ATG14	-0.136673	0.297963	-0.106328	0.939005
ATG16L1	-0.0392124	0.749888	0.0533466	0.98208
ATG16L2	-0.0230269	0.901729	0.0210275	0.994318
ATG2A	0.229309	0.411021	0.242639	0.943289
ATG2B	-0.0319964	0.77198	6.03e-05	0.982772
ATG3	0.157152	0.479503	0.196462	0.959191
ATG4A	0.335633	0.138562	0.286515	0.903293
ATG4B	0.102442	0.565005	0.133517	0.970047
ATG4C	0.27545	0.0461708	0.201042	0.893964
ATG4D	-0.0819596	0.745293	-0.0898884	0.981908
ATG5	-0.125031	0.456101	-0.184837	0.953716
ATG7	0.0761801	0.395168	0.0829365	0.940789
ATG9A	-0.0400426	0.746849	-0.00363885	0.98208
ATG9B	-0.208661	0.332488	-0.19601	0.939005
ATIC	-0.0777431	0.560197	-0.0805438	0.969733
ATL1	-0.149502	0.55473	-0.10964	0.969733
ATL2	-0.0721529	0.661307	-0.0937702	0.978203
ATL3	0.195882	0.0794768	0.126265	0.893964
ATM	0.0442111	0.64566	0.0431351	0.978203
ATMIN	-0.0046763	0.953217	-0.0154383	0.99599
ATN1	-0.0315629	0.897657	0.035489	0.993831
ATOH8	0.249302	0.314055	0.121789	0.939005
ATOX1	0.214842	0.19961	0.0893882	0.913106
ATP10A	0.104316	0.698153	0.0452885	0.978203
ATP10B	0.191123	0.285138	0.225246	0.939005
ATP10D	0.0651311	0.589893	0.122862	0.973864
ATP11A	0.17795	0.181481	0.129187	0.906212
ATP11A-AS1	0.0128156	0.953599	-0.0923425	0.99599
ATP11B	-0.0163057	0.893667	-0.0826026	0.993634
ATP11C	0.187373	0.324771	0.0599081	0.939005
ATP13A1	-0.196998	0.409658	-0.152165	0.943289
ATP13A2	0.159636	0.4807	0.182909	0.959191
ATP13A3	0.0780891	0.547727	0.0288928	0.968991
ATP13A4	0.163991	0.242216	0.118424	0.932035
ATP13A5	-0.295654	0.203837	-0.353262	0.914764
ATP1A1	-0.291257	0.0801479	-0.228949	0.893964
ATP1A1-AS1	0.141602	0.544136	0.184688	0.968991
ATP1A2	0.0776874	0.579047	0.0472018	0.972847
ATP1A3	-0.261525	0.105714	-0.161333	0.893964
ATP1A4	0.0743758	0.811435	0.00581295	0.985695
ATP1B1	-0.22538	0.386252	-0.159307	0.939005
ATP1B2	0.321679	0.0916624	0.290174	0.893964
ATP1B3	-0.0305582	0.861528	0.00220304	0.990672
ATP2A1	-0.121415	0.670095	-0.0103443	0.978203
ATP2A2	-0.0650313	0.361084	-0.0445484	0.939005
ATP2B1	-0.254027	0.18546	-0.201319	0.906212
ATP2B2	-0.160093	0.0969804	-0.0990151	0.893964
ATP2B3	-0.238879	0.0917367	-0.192093	0.893964
ATP2B4	0.0536395	0.382287	0.0685944	0.939005
ATP2C1	0.0306102	0.793467	0.025024	0.98529
ATP2C2	0.419641	0.0664111	0.365473	0.893964
ATP5A1	-0.164426	0.252489	-0.126247	0.934562
ATP5B	-0.153717	0.317856	-0.126994	0.939005
ATP5C1	0.0429533	0.747084	-0.0147487	0.98208
ATP5D	-0.201925	0.52336	-0.202315	0.968991
ATP5EP2	-0.0532871	0.826619	-0.138282	0.987215
ATP5F1	0.0929991	0.5208	0.111363	0.968991
ATP5G1	-0.399194	0.0549619	-0.334241	0.893964
ATP5G2	0.0412706	0.695998	0.00123278	0.978203
ATP5G3	-0.194366	0.239192	-0.22948	0.931729
ATP5H	-0.109022	0.616011	-0.104966	0.974351
ATP5I	0.0785966	0.495225	0.0964819	0.960607
ATP5J	-0.141675	0.480231	-0.246048	0.959191
ATP5J2	-0.0282955	0.890956	-0.0122372	0.993634
ATP5L	-0.0341813	0.832893	-0.137865	0.987845
ATP5O	-0.187908	0.2296	-0.187383	0.927625
ATP5S	-0.0899384	0.553915	-0.0332368	0.969733
ATP5SL	0.218784	0.20785	0.133137	0.917089
ATP6	0.0682739	0.767605	-0.0326918	0.982772
ATP6AP1	-0.13651	0.332844	-0.0939661	0.939005
ATP6AP1L	0.172071	0.41235	0.26329	0.943289
ATP6AP2	-0.317446	0.153134	-0.273746	0.903293
ATP6V0A1	-0.116953	0.100071	-0.097093	0.893964
ATP6V0A2	0.0978818	0.4383	0.0606412	0.947598
ATP6V0B	-0.057894	0.718018	0.00825365	0.97935
ATP6V0C	-0.168654	0.320116	-0.215418	0.939005
ATP6V0D1	-0.0858324	0.466947	-0.0532227	0.957003
ATP6V0E1	0.0533605	0.774731	-0.042501	0.982772
ATP6V0E2	0.040902	0.809312	0.102586	0.985355
ATP6V0E2-AS1	0.173418	0.415934	0.110248	0.943289
ATP6V1A	-0.250698	0.243459	-0.207483	0.932035
ATP6V1B2	-0.182559	0.377364	-0.134622	0.939005
ATP6V1C1	-0.226591	0.162122	-0.207948	0.903293
ATP6V1C2	0.135884	0.453055	0.232191	0.952278
ATP6V1D	-0.347116	0.0828333	-0.283406	0.893964
ATP6V1E1	-0.12954	0.543547	-0.128146	0.968991
ATP6V1E2	0.181065	0.427921	0.195443	0.946346
ATP6V1F	-0.153678	0.25443	-0.146177	0.935637
ATP6V1G1	0.171626	0.292681	0.158883	0.939005
ATP6V1H	-0.323608	0.086487	-0.260406	0.893964
ATP7A	0.020465	0.899903	-0.0408607	0.993831
ATP7B	-0.00321751	0.980852	0.00794986	0.997685
ATP8	0.302678	0.361119	0.143111	0.939005
ATP8A1	-0.0205326	0.894213	0.000815495	0.993634
ATP8A2	-0.241444	0.145531	-0.152568	0.903293
ATP8B1	-0.0654006	0.732924	0.027245	0.98024
ATP8B2	0.107623	0.284248	0.104825	0.939005
ATP8B4	-0.164999	0.440316	-0.157225	0.947727
ATP9A	-0.0673786	0.316138	-0.0504182	0.939005
ATP9B	-0.0923801	0.238777	-0.109994	0.931674
ATPAF1	-0.0453744	0.672023	-0.0419961	0.978203
ATPAF2	0.160031	0.208801	0.13581	0.917672
ATPIF1	0.0117609	0.950124	0.0428749	0.99599
ATR	0.249267	0.0729455	0.189306	0.893964
ATRAID	-0.404141	0.040708	-0.354509	0.893964
ATRIP	0.443219	0.0498151	0.254491	0.893964
ATRN	-0.0278523	0.742674	-0.058879	0.981274
ATRNL1	-0.20266	0.256125	-0.172896	0.935637
ATRX	0.0314776	0.665868	0.00780618	0.978203
ATXN1	-0.135434	0.0102031	-0.129544	0.848134
ATXN10	0.0259465	0.773445	0.0053737	0.982772
ATXN1L	0.0103214	0.930311	-0.0695176	0.995961
ATXN2	0.0518256	0.570308	0.0364586	0.970192
ATXN2L	-0.0844401	0.536666	-0.0707316	0.968991
ATXN3	-0.113406	0.341065	-0.0625414	0.939005
ATXN7	-0.177216	0.0687833	-0.148928	0.893964
ATXN7L1	-0.0869947	0.469689	-0.0679481	0.958166
ATXN7L2	-0.0415648	0.832318	-0.0418354	0.987845
ATXN7L3	-0.204874	0.0938532	-0.167812	0.893964
ATXN7L3B	-0.0992671	0.340679	-0.0979813	0.939005
AUH	-0.048969	0.746816	-0.072068	0.98208
AUNIP	0.0858685	0.702395	0.163532	0.978203
AUP1	-0.299127	0.0521079	-0.206599	0.893964
AURKA	0.0832433	0.662985	0.0274706	0.978203
AURKAIP1	-0.278812	0.214775	-0.199381	0.920538
AURKAPS1	-0.35229	0.169618	-0.309821	0.903293
AURKC	-0.0413783	0.826846	0.0229928	0.987215
AUTS2	-0.0140767	0.909359	-0.0402289	0.994654
AVEN	-0.240363	0.122061	-0.28232	0.899041
AVIL	0.116516	0.49388	0.115915	0.960607
AVL9	-0.175207	0.153098	-0.15972	0.903293
AVPI1	-0.180778	0.383102	-0.162273	0.939005
AVPR1A	0.10158	0.625907	0.0485691	0.976828
AXIN1	0.182012	0.394075	0.19866	0.940655
AXIN2	-0.0951572	0.512678	-0.0606131	0.968118
AXL	0.266156	0.185502	0.265813	0.906212
AZGP1	-0.159633	0.476592	-0.240884	0.958964
AZI2	-0.0321167	0.813313	-0.0180894	0.985717
AZIN1	-0.118312	0.278657	-0.110986	0.939005
AZIN1-AS1	0.087321	0.740897	0.0201646	0.981274
AZIN2	0.203176	0.131583	0.22038	0.903293
B2M	0.284379	0.23122	0.149682	0.928119
B3GALNT1	-0.202895	0.320181	-0.213204	0.939005
B3GALNT2	-0.0451558	0.814097	0.0444238	0.985831
B3GALT1	0.0277878	0.874094	-0.0444063	0.991212
B3GALT2	0.023947	0.912704	0.0446259	0.994654
B3GALT5	0.00985592	0.967697	0.0371314	0.997265
B3GALT5-AS1	0.126766	0.525003	0.168313	0.968991
B3GALT6	-0.154462	0.481256	-0.202114	0.959191
B3GAT1	0.00780403	0.962273	0.0184095	0.996461
B3GAT3	-0.233552	0.338911	-0.191226	0.939005
B3GLCT	0.0907109	0.593599	0.0185003	0.973864
B3GNT2	-0.139317	0.369244	-0.200707	0.939005
B3GNT4	0.000256998	0.999141	-0.112821	0.999801
B3GNT5	-0.180856	0.336003	-0.183437	0.939005
B3GNT7	0.284187	0.234479	0.216349	0.928448
B3GNT9	0.313573	0.196614	0.295125	0.909081
B4GALNT1	-0.250084	0.0757098	-0.209185	0.893964
B4GALNT3	-0.187687	0.378533	-0.0288246	0.939005
B4GALNT4	-0.10468	0.698718	-0.0951484	0.978203
B4GALT1	0.425456	0.0232857	0.343394	0.893964
B4GALT2	0.185455	0.333748	0.13917	0.939005
B4GALT3	0.0111951	0.947075	-0.0839201	0.99599
B4GALT4	-0.130345	0.559971	-0.156403	0.969733
B4GALT5	-0.102717	0.210299	-0.100671	0.919597
B4GALT6	-0.407169	0.0923546	-0.309485	0.893964
B4GALT7	0.149125	0.514108	0.194426	0.968401
B4GAT1	-0.130895	0.405799	-0.113031	0.943289
B9D1	0.0125419	0.948463	0.0199571	0.99599
B9D2	-0.221041	0.31431	-0.26306	0.939005
BAALC	0.091178	0.287006	0.0418882	0.939005
BAALC-AS1	0.387078	0.172582	0.353362	0.903293
BABAM1	0.0994841	0.401322	0.148409	0.942933
BACE1	0.138303	0.0522163	0.108282	0.893964
BACE1-AS	0.0569213	0.741177	0.0750044	0.981274
BACE2	0.0704691	0.764741	0.0372516	0.982772
BACH1	0.0394207	0.65521	0.0169384	0.978203
BACH2	0.123856	0.406461	0.215106	0.943289
BAG1	-0.0105346	0.936236	-0.0312116	0.995961
BAG2	0.121532	0.607496	0.0489868	0.974076
BAG3	0.019398	0.952505	0.170209	0.99599
BAG4	-0.346224	0.0376521	-0.240406	0.893964
BAG5	-0.169828	0.208529	-0.175161	0.917599
BAHCC1	-0.153898	0.541881	-0.145915	0.968991
BAHD1	0.0715262	0.711673	-0.0187911	0.979315
BAIAP2	0.00416931	0.979588	0.0161148	0.997685
BAIAP2-AS1	-0.00621353	0.970215	-0.0882724	0.997685
BAIAP2L1	0.152453	0.596061	0.177908	0.973864
BAIAP2L2	-0.0534799	0.816938	-0.0169754	0.986382
BAIAP3	-0.184315	0.433059	-0.0787286	0.947153
BAK1	-0.242189	0.243875	-0.167948	0.932035
BAMBI	-0.0386507	0.861719	0.00047697	0.990672
BANF1	0.226452	0.290185	0.212423	0.939005
BANP	0.104107	0.632769	0.138937	0.97775
BAP1	-0.0890232	0.56992	-0.0328293	0.970192
BARD1	0.394339	0.0463801	0.371201	0.893964
BASP1	-0.288536	0.0527301	-0.219353	0.893964
BAX	0.0162577	0.942796	0.0910016	0.99599
BAZ1A	0.234359	0.16302	0.234968	0.903293
BAZ1B	0.171621	0.0122302	0.114324	0.848134
BAZ2A	0.0440671	0.655224	0.0141299	0.978203
BAZ2B	0.115051	0.265827	0.100951	0.935637
BBIP1	0.136091	0.567556	0.130273	0.970135
BBOF1	0.17738	0.347652	0.0595011	0.939005
BBOX1	-0.203087	0.371243	-0.256609	0.939005
BBS1	-0.114525	0.453746	-0.0720877	0.952376
BBS10	-0.134391	0.500972	-0.133408	0.962871
BBS12	-0.0985456	0.654689	-0.196656	0.978203
BBS2	0.0143919	0.877474	-0.00460008	0.992461
BBS4	-0.135139	0.534751	-0.126602	0.968991
BBS5	-0.184026	0.316924	-0.230926	0.939005
BBS7	-0.202824	0.264877	-0.208338	0.935637
BBS9	0.0845275	0.445281	0.0871484	0.947727
BBX	0.0479956	0.5962	0.0227606	0.973864
BCAM	0.315442	0.326671	0.326203	0.939005
BCAN	0.0520308	0.81953	0.010909	0.986791
BCAP29	-0.0825352	0.641812	-0.0754097	0.978203
BCAP31	-0.174	0.0930976	-0.15904	0.893964
BCAR1	0.0175413	0.947121	0.034074	0.99599
BCAR3	-0.0106286	0.960203	-0.0594184	0.9963
BCAS1	0.493022	0.0636578	0.424989	0.893964
BCAS2	0.0332384	0.903009	-0.0114375	0.994514
BCAS3	-0.0809365	0.44577	-0.0678418	0.94776
BCAS4	-0.195557	0.329818	-0.127919	0.939005
BCAT1	-0.313551	0.122875	-0.257635	0.899041
BCAT2	0.147747	0.55135	0.283845	0.969038
BCCIP	0.148614	0.417916	0.153233	0.943358
BCDIN3D	0.391086	0.0917119	0.36908	0.893964
BCDIN3D-AS1	-0.192238	0.422599	-0.125398	0.944485
BCHE	0.394404	0.0831835	0.182816	0.893964
BCKDHA	0.382813	0.137066	0.252628	0.903293
BCKDHB	0.0211542	0.869591	-0.091135	0.990757
BCKDK	0.103561	0.544698	0.0230004	0.968991
BCL10	0.159899	0.370656	0.0229056	0.939005
BCL11A	-0.182857	0.172338	-0.147802	0.903293
BCL11B	-0.251467	0.148295	-0.167764	0.903293
BCL2	0.0591564	0.658334	0.032894	0.978203
BCL2L1	-0.0571137	0.696378	-0.0694466	0.978203
BCL2L11	0.0582056	0.778516	-0.0278669	0.982887
BCL2L13	-0.0391173	0.56674	-0.0171997	0.970135
BCL2L15	-0.172898	0.445418	-0.309052	0.947727
BCL2L2	0.0423225	0.625509	0.0269687	0.976828
BCL3	0.337422	0.166941	0.177474	0.903293
BCL6	0.184895	0.346338	0.178062	0.939005
BCL6B	0.0110259	0.965761	-0.1415	0.996908
BCL7A	-0.0615563	0.654389	-0.0828647	0.978203
BCL7B	0.0135442	0.932476	-0.0252867	0.995961
BCL7C	0.00585588	0.980414	-0.0224209	0.997685
BCL9	0.211651	0.124603	0.218289	0.899841
BCL9L	-0.00524813	0.983753	-0.0274097	0.997685
BCLAF1	-0.0119365	0.919494	0.0113225	0.994654
BCO1	0.26063	0.31679	0.435985	0.939005
BCO2	0.00899644	0.96486	-0.00436138	0.99658
BCOR	0.182596	0.138499	0.164362	0.903293
BCORL1	-0.0248648	0.900628	0.0444754	0.993986
BCR	-0.075837	0.689887	-0.0609561	0.978203
BCS1L	0.0553305	0.765383	0.00784228	0.982772
BCYRN1	-0.339058	0.344591	-0.179241	0.939005
BDH2	0.144347	0.458829	0.19478	0.955181
BDNF	-0.2482	0.343611	-0.211166	0.939005
BDNF-AS	0.0850532	0.714954	0.02654	0.97935
BEAN1	-0.275997	0.173466	-0.143568	0.903293
BECN1	-0.287799	0.0725799	-0.237019	0.893964
BEGAIN	-0.23683	0.268879	-0.149678	0.936581
BEND3	0.523829	0.00166388	0.582975	0.83425
BEND3P3	0.0853118	0.582098	0.0111413	0.97361
BEND4	-0.115502	0.682556	0.0465173	0.978203
BEND5	-0.0619431	0.779215	-0.114668	0.983168
BEND6	-0.198496	0.249395	-0.147309	0.934339
BEND7	0.0434441	0.813585	0.0171345	0.985717
BEST1	0.453092	0.0134401	0.447204	0.867321
BEST3	-0.228287	0.388332	-0.0834801	0.939005
BET1	-0.0801456	0.723505	-0.0935689	0.98024
BET1L	-0.0716139	0.701966	-0.0341617	0.978203
BEX1	-0.205022	0.437982	-0.159092	0.947598
BEX2	-0.285836	0.210239	-0.165612	0.919597
BEX3	-0.193489	0.111542	-0.172115	0.893964
BEX4	-0.0690375	0.667073	-0.0164256	0.978203
BEX5	0.0628883	0.82267	0.066803	0.987215
BGN	0.426365	0.162685	0.372369	0.903293
BHLHB9	-0.252225	0.162233	-0.178373	0.903293
BHLHE22	0.024422	0.896037	-0.0766336	0.993831
BHLHE40	0.260285	0.0498131	0.250676	0.893964
BHLHE41	0.0885321	0.471708	-0.0262087	0.958531
BHMT2	-0.0902778	0.632877	0.0544753	0.97775
BICC1	0.395921	0.0568365	0.291579	0.893964
BICD1	-0.0651473	0.443764	-0.0262041	0.947727
BICD2	-0.18032	0.081147	-0.109575	0.893964
BICDL1	-0.13967	0.33374	-0.057145	0.939005
BID	-0.0908986	0.420745	-0.103347	0.943832
BIN1	-0.0192008	0.918905	0.0478055	0.994654
BIN2	0.0951394	0.696688	0.148432	0.978203
BIN3	-0.191269	0.27007	-0.190887	0.937513
BIN3-IT1	0.0935772	0.687556	0.0486934	0.978203
BIRC2	0.00280822	0.983412	-0.010441	0.997685
BIRC3	-0.0330349	0.888527	-0.00789451	0.993628
BIRC6	0.0627593	0.399285	0.0541125	0.942245
BIRC6-AS2	0.0516253	0.827099	0.0267126	0.987215
BISPR	-0.00638025	0.978193	-0.00375385	0.997685
BIVM	-0.204857	0.365616	-0.145715	0.939005
BLACAT1	-0.101777	0.567147	-0.29785	0.970135
BLCAP	-0.122796	0.133209	-0.174659	0.903293
BLID	0.415075	0.0309936	0.306008	0.893964
BLM	0.0208823	0.906843	-0.0296011	0.994654
BLMH	-0.0551998	0.788863	-0.0521707	0.98529
BLNK	7.34e-05	0.999782	0.0265252	0.999849
BLOC1S1	-0.278346	0.112146	-0.299474	0.89495
BLOC1S2	-0.0427352	0.820065	0.0220511	0.986791
BLOC1S3	0.0245711	0.913379	-0.0547789	0.994654
BLOC1S4	0.0672902	0.752444	0.0420988	0.982655
BLOC1S6	-0.002292	0.985721	0.00778295	0.997851
BLVRA	-0.108693	0.549791	-0.0285524	0.968991
BLVRB	-0.0417871	0.867333	0.0244718	0.990757
BLZF1	-0.107453	0.454493	-0.108802	0.952952
BMF	0.270205	0.233168	0.181062	0.928448
BMP1	-0.0676471	0.806524	-0.17878	0.985355
BMP2	0.162576	0.400853	0.148552	0.94283
BMP2K	0.127585	0.2929	0.0817948	0.939005
BMP3	-0.0383609	0.869927	-0.0633528	0.990757
BMP4	-0.346577	0.182983	-0.315004	0.906212
BMP6	0.458203	0.115529	0.402422	0.895406
BMP7	0.119242	0.565423	0.048594	0.970047
BMP8A	-0.0321865	0.831561	0.0177434	0.987845
BMP8B	0.48944	0.00841321	0.406047	0.83425
BMPER	-0.336868	0.0982174	-0.241088	0.893964
BMPR1A	-0.134282	0.463298	-0.137465	0.956386
BMPR1B	0.0584948	0.719341	0.0327605	0.97959
BMPR2	-0.0345993	0.72887	-0.0310026	0.98024
BMS1	-0.0438613	0.71622	-0.0166974	0.97935
BMS1P20	-0.0541293	0.781841	-0.0199365	0.984061
BMS1P21	-0.313767	0.148516	-0.28694	0.903293
BMS1P4	-0.445702	0.0223258	-0.275809	0.893964
BMS1P5	0.166491	0.440011	0.148054	0.947727
BMS1P6	-0.256399	0.332643	-0.310895	0.939005
BMT2	-0.0230423	0.890041	-0.0300785	0.993628
BNC2	0.164	0.541584	0.226411	0.968991
BNIP1	-0.146053	0.408965	-0.103871	0.943289
BNIP2	0.222812	0.0735908	0.168883	0.893964
BNIP3	-0.0638141	0.698619	-0.0747215	0.978203
BNIP3L	-0.00662244	0.944022	-0.0669295	0.99599
BNIPL	-0.0741207	0.751155	-0.0370398	0.98208
BOC	-0.00531265	0.982756	0.0597854	0.997685
BOD1	0.046337	0.752526	0.0799905	0.982664
BOD1L1	0.0401077	0.608422	0.035012	0.974076
BOK	0.257858	0.352041	0.290658	0.939005
BOLA1	-0.0941657	0.648724	-0.0881493	0.978203
BOLA3	0.0874964	0.698656	0.125339	0.978203
BOLA3-AS1	0.0333487	0.836166	0.0583467	0.987845
BOP1	0.0200252	0.945072	0.0867031	0.99599
BORA	0.423938	0.0470131	0.400264	0.893964
BORCS5	0.127216	0.312052	0.108059	0.939005
BORCS6	0.42243	0.172887	0.320504	0.903293
BORCS7	-0.10725	0.596736	-0.0779266	0.973949
BORCS8	0.0300884	0.877942	0.00238575	0.992771
BPGM	-0.0702322	0.738082	-0.0620889	0.980708
BPHL	-0.0982194	0.631314	-0.109386	0.97775
BPNT1	-0.248957	0.21062	-0.223882	0.919732
BPTF	0.0603112	0.439976	0.0374165	0.947727
BRAF	-0.105962	0.374696	-0.0646993	0.939005
BRAP	-0.233362	0.0604261	-0.245774	0.893964
BRAT1	-0.0208072	0.943389	0.0627214	0.99599
BRCA1	0.392166	0.055414	0.401569	0.893964
BRCA2	0.252192	0.250037	0.3165	0.934339
BRCAT54	-0.35553	0.168884	-0.292883	0.903293
BRCC3	0.0220942	0.911197	-0.00197762	0.994654
BRD1	-0.0929965	0.52916	-0.036964	0.968991
BRD3	0.155196	0.350551	0.106428	0.939005
BRD4	-0.0925476	0.602331	-0.0653275	0.974076
BRD7	0.0623354	0.712979	-0.03451	0.97935
BRD7P3	-0.154705	0.391309	-0.0474109	0.939005
BRD8	-0.161389	0.0967215	-0.192813	0.893964
BRD9	0.256612	0.0217876	0.179421	0.893964
BRE	-0.100377	0.496344	-0.0520165	0.960758
BRF1	-0.0435562	0.800686	-0.0354611	0.98529
BRF2	-0.0474748	0.810751	-0.131172	0.985488
BRI3	-0.212045	0.288316	-0.229531	0.939005
BRI3BP	-0.167067	0.436774	-0.185736	0.947598
BRICD5	0.101419	0.728851	0.0928572	0.98024
BRINP1	-0.028511	0.751036	-0.0151806	0.98208
BRINP2	-0.038067	0.707009	-0.0087381	0.97869
BRINP3	-0.168742	0.228416	-0.181594	0.925797
BRIP1	-0.071714	0.748957	-0.0883741	0.98208
BRIX1	0.176475	0.37676	0.128706	0.939005
BRK1	0.0295883	0.800038	-0.0714518	0.98529
BRMS1	-0.0617582	0.764908	-0.0488483	0.982772
BRMS1L	-0.24311	0.322013	-0.263536	0.939005
BROX	0.0291527	0.785738	-0.0311576	0.984719
BRPF1	0.2485	0.171757	0.313617	0.903293
BRPF3	-0.0529416	0.696606	-0.0614961	0.978203
BRSK1	-0.110952	0.513779	-0.0567252	0.968401
BRSK2	0.046615	0.804012	0.14648	0.985355
BRWD1	0.000298628	0.997437	-0.00148325	0.999801
BRWD3	0.0585275	0.480125	0.0221862	0.959191
BSDC1	-0.0348112	0.718645	-0.0333282	0.97935
BSG	0.0287996	0.915651	0.0382257	0.994654
BSN	-0.127669	0.476982	-0.0747711	0.959191
BSPRY	0.167679	0.388877	0.190999	0.939005
BST2	0.06114	0.822365	0.0657648	0.987172
BTAF1	0.00323432	0.971376	0.0243183	0.997685
BTBD1	-0.0147299	0.907863	-0.0512146	0.994654
BTBD10	0.0893411	0.423598	0.0741225	0.944485
BTBD11	-0.260585	0.198303	-0.26736	0.911126
BTBD18	-0.135053	0.434744	-0.25001	0.947572
BTBD19	-0.261529	0.248359	-0.13231	0.933861
BTBD2	-0.0646273	0.84294	0.0261793	0.987845
BTBD3	-0.0895271	0.503407	-0.0266136	0.964575
BTBD6	-0.199586	0.160959	-0.189208	0.903293
BTBD8	0.155718	0.464075	0.0733301	0.956386
BTBD9	-0.201888	0.00378765	-0.189393	0.83425
BTC	-0.117157	0.578084	-0.197285	0.972826
BTD	0.243802	0.181288	0.119805	0.906212
BTF3	0.0211454	0.87048	-0.000515975	0.990757
BTF3L4	-0.206338	0.225812	-0.13792	0.9245
BTG1	-0.00390849	0.980933	-0.0842808	0.997685
BTG2	0.226644	0.312591	0.0947407	0.939005
BTG3	-0.208564	0.350966	-0.348971	0.939005
BTK	0.0996744	0.616015	0.0344089	0.974351
BTN2A1	0.168055	0.31801	0.223083	0.939005
BTN2A2	0.127557	0.579601	0.0568191	0.973252
BTN2A3P	0.340661	0.251408	0.30189	0.934339
BTN3A1	0.512706	0.00708433	0.482962	0.83425
BTN3A2	0.438343	0.0457967	0.397347	0.893964
BTN3A3	-0.143207	0.512407	-0.0382183	0.968118
BTNL9	0.198107	0.390459	0.0375	0.939005
BTRC	0.0596693	0.512342	0.0412888	0.968118
BUB3	-0.0723899	0.666733	-0.0124103	0.978203
BUD13	0.0353873	0.878824	0.0437701	0.992883
BUD31	0.390034	0.0738957	0.319539	0.893964
BVES	0.134083	0.548973	0.120566	0.968991
BYSL	-0.542864	0.0117001	-0.427263	0.848134
BZW1	0.0295397	0.837479	-0.0183497	0.987845
BZW2	-0.378349	0.128945	-0.39392	0.902775
C10orf10	0.156324	0.586118	0.213127	0.973864
C10orf105	0.60016	0.0739101	0.45396	0.893964
C10orf107	-0.264949	0.320081	-0.178936	0.939005
C10orf11	0.439653	0.064859	0.455633	0.893964
C10orf113	-0.0385175	0.869794	-0.0656514	0.990757
C10orf12	0.040623	0.732988	-0.0198713	0.98024
C10orf128	0.232977	0.289592	0.195735	0.939005
C10orf2	-0.322325	0.111905	-0.301887	0.893964
C10orf25	-0.0854758	0.681665	-0.112739	0.978203
C10orf35	0.192183	0.339031	0.0721478	0.939005
C10orf54	0.282901	0.333914	0.191731	0.939005
C10orf67	0.161184	0.540463	0.147231	0.968991
C10orf76	-0.156548	0.0743827	-0.139014	0.893964
C10orf88	-0.142863	0.513645	-0.0543478	0.968401
C10orf90	0.373089	0.0421551	0.347581	0.893964
C11orf1	0.114822	0.617351	0.123155	0.974474
C11orf24	-0.308311	0.102471	-0.212736	0.893964
C11orf31	-0.226968	0.205683	-0.179775	0.914764
C11orf42	0.151245	0.455884	0.110612	0.953545
C11orf45	0.025191	0.902476	-0.0150678	0.994358
C11orf49	0.0153771	0.905495	0.0185187	0.994654
C11orf54	0.188817	0.266137	0.102909	0.935637
C11orf57	0.0504002	0.763335	0.100216	0.982772
C11orf58	0.0403547	0.72716	0.0387122	0.98024
C11orf63	-0.376575	0.0896363	-0.415102	0.893964
C11orf65	0.182846	0.400855	-0.00348248	0.94283
C11orf68	-0.0138662	0.946774	-0.0271185	0.99599
C11orf71	-0.00583133	0.977714	0.0321317	0.997685
C11orf74	-0.296011	0.129724	-0.217362	0.902775
C11orf80	-0.131135	0.452853	-0.063363	0.952112
C11orf84	-0.0506189	0.821649	-0.0667486	0.986867
C11orf87	-0.233836	0.210455	-0.173687	0.919603
C11orf95	0.0180753	0.897799	-0.0118792	0.993831
C11orf96	0.619212	0.0234225	0.656768	0.893964
C12orf10	-0.0226038	0.900058	0.0502636	0.993831
C12orf29	-0.283401	0.160598	-0.265639	0.903293
C12orf4	-0.339685	0.159155	-0.296547	0.903293
C12orf42	0.474686	0.00769167	0.318786	0.83425
C12orf43	-0.367246	0.0357449	-0.272784	0.893964
C12orf45	0.30098	0.231362	0.200346	0.928119
C12orf49	0.176182	0.0957668	0.166161	0.893964
C12orf54	-0.306848	0.0699804	-0.219779	0.893964
C12orf57	0.144287	0.58196	0.125868	0.973534
C12orf60	-0.0922955	0.595318	-0.186379	0.973864
C12orf65	0.184974	0.174916	0.252357	0.903791
C12orf66	0.120596	0.548127	0.0694265	0.968991
C12orf73	-0.0696767	0.794196	-0.0532099	0.98529
C12orf75	0.183788	0.39497	0.0987467	0.940789
C12orf76	0.125326	0.358909	0.101512	0.939005
C14orf1	0.0897104	0.666314	0.0455268	0.978203
C14orf119	-0.256135	0.260399	-0.263493	0.935637
C14orf132	-0.111563	0.163561	-0.114405	0.903293
C14orf159	0.201014	0.062706	0.1877	0.893964
C14orf166	-0.129529	0.562032	-0.197096	0.969733
C14orf169	0.131946	0.48273	0.130259	0.959191
C14orf2	-0.214417	0.316856	-0.177663	0.939005
C14orf28	-0.024922	0.908865	-0.170363	0.994654
C14orf37	0.120471	0.456449	0.109694	0.954054
C14orf79	-0.284696	0.117293	-0.189382	0.896851
C14orf80	-0.0197205	0.943974	-0.0767436	0.99599
C14orf93	0.236986	0.227523	0.119597	0.925003
C15orf39	0.486713	0.0680968	0.385285	0.893964
C15orf40	0.0831681	0.63835	0.157245	0.978203
C15orf41	-0.337808	0.100322	-0.265147	0.893964
C15orf52	0.267348	0.33324	0.198057	0.939005
C15orf57	0.00772539	0.961541	0.093906	0.996461
C15orf59	-0.0473799	0.794011	-0.0250942	0.98529
C15orf61	-0.0671843	0.806683	-0.122626	0.985355
C15orf62	0.281119	0.185161	0.263691	0.906212
C16orf46	-0.242114	0.239287	-0.253852	0.931729
C16orf52	-0.134455	0.439355	-0.114454	0.947727
C16orf58	-0.085525	0.671138	0.00828555	0.978203
C16orf62	0.0566607	0.487571	0.0553043	0.95962
C16orf70	-0.00235438	0.98562	0.00575045	0.997851
C16orf71	0.105591	0.684493	0.0650554	0.978203
C16orf72	-0.0419413	0.642884	-0.0160132	0.978203
C16orf87	0.204052	0.424242	0.118927	0.944485
C16orf89	0.0694908	0.768949	-0.0136725	0.982772
C16orf91	-0.00284223	0.986568	0.0378527	0.998145
C17orf102	0.16559	0.481944	0.0978098	0.959191
C17orf107	-0.149344	0.548835	-0.135482	0.968991
C17orf51	-0.138756	0.169244	-0.125835	0.903293
C17orf53	0.222831	0.313678	0.309342	0.939005
C17orf58	-0.127835	0.524373	-0.169766	0.968991
C17orf62	0.244068	0.260225	0.257827	0.935637
C17orf67	0.121915	0.561473	0.134873	0.969733
C17orf75	-0.230422	0.150847	-0.177025	0.903293
C17orf80	0.169738	0.132243	0.129223	0.903293
C17orf97	0.129838	0.558195	0.103383	0.969733
C18orf21	-0.247782	0.221255	-0.141301	0.921922
C18orf25	-0.107187	0.340273	-0.100313	0.939005
C18orf54	0.298529	0.148742	0.385306	0.903293
C18orf8	0.12361	0.35689	0.190445	0.939005
C19orf12	-0.149434	0.130845	-0.100361	0.903293
C19orf24	-0.609967	0.0270363	-0.651242	0.893964
C19orf25	0.291469	0.323599	0.23708	0.939005
C19orf43	0.231435	0.197149	0.236768	0.909827
C19orf44	0.086961	0.732432	0.183225	0.98024
C19orf47	0.308793	0.142578	0.169046	0.903293
C19orf48	-0.0236493	0.894163	-0.110268	0.993634
C19orf52	0.158131	0.46565	0.166366	0.956905
C19orf53	0.142407	0.395859	0.132506	0.940963
C19orf54	-0.0994567	0.65613	-0.0176351	0.978203
C19orf57	0.0446063	0.859988	0.164027	0.990506
C19orf60	-0.612153	0.0102791	-0.606226	0.848134
C19orf66	0.105803	0.553079	0.0730375	0.969666
C19orf68	0.113347	0.651212	0.0188557	0.978203
C19orf70	0.0805439	0.738866	0.155804	0.980708
C19orf71	0.277736	0.398502	0.418377	0.941753
C1D	-0.0788187	0.673749	-0.22955	0.978203
C1GALT1	0.0219535	0.874367	-0.0158121	0.991212
C1GALT1C1	0.0554083	0.81554	0.0360689	0.986174
C1orf101	-0.298173	0.109607	-0.311054	0.893964
C1orf109	-0.0853244	0.665665	-0.143014	0.978203
C1orf111	-0.0580178	0.812166	-0.155258	0.985717
C1orf112	-0.170448	0.355579	-0.208715	0.939005
C1orf115	-0.242274	0.157279	-0.193452	0.903293
C1orf122	-0.047554	0.799081	-0.1432	0.98529
C1orf123	0.0923169	0.565106	0.089905	0.970047
C1orf131	0.0156227	0.950828	0.16245	0.99599
C1orf145	0.20926	0.297955	0.0679237	0.939005
C1orf159	0.0283462	0.890601	0.113336	0.993628
C1orf162	0.0946298	0.635635	-0.0404584	0.978086
C1orf174	0.322701	0.0890991	0.205093	0.893964
C1orf198	0.300626	0.0699695	0.284826	0.893964
C1orf204	0.0986762	0.567714	0.0343743	0.970135
C1orf21	-0.103598	0.165081	-0.121881	0.903293
C1orf216	-0.0833634	0.541886	-0.0489411	0.968991
C1orf220	0.260218	0.273516	0.233491	0.93805
C1orf226	0.177283	0.416854	0.206446	0.943289
C1orf228	0.0953098	0.670049	0.0885118	0.978203
C1orf27	-0.104726	0.416771	-0.0813078	0.943289
C1orf35	0.131693	0.573627	0.174764	0.970947
C1orf43	-0.0349982	0.735436	-0.0661982	0.980283
C1orf50	0.036413	0.853243	0.0848437	0.989176
C1orf52	0.223902	0.207552	0.249762	0.916572
C1orf54	0.0751212	0.715974	0.0593117	0.97935
C1orf56	-0.0520094	0.818891	-0.0827975	0.98678
C1orf61	0.27577	0.0781024	0.231278	0.893964
C1orf64	0.65637	0.0114244	0.589284	0.848134
C1orf74	0.15449	0.433282	0.229623	0.947153
C1QA	0.172607	0.506278	0.138651	0.966216
C1QB	0.126878	0.61025	0.235742	0.974076
C1QBP	-0.0718574	0.782309	0.00535117	0.984151
C1QC	-0.151936	0.606806	-0.105997	0.974076
C1QL1	-0.214152	0.383369	-0.113412	0.939005
C1QL2	-0.0280193	0.910127	0.0373192	0.994654
C1QL3	-0.0808064	0.770243	-0.156204	0.982772
C1QTNF1	0.442471	0.101007	0.365455	0.893964
C1QTNF2	-0.514846	0.0105494	-0.550338	0.848134
C1QTNF3	0.289667	0.120894	0.221985	0.899041
C1QTNF6	0.198454	0.331581	0.140614	0.939005
C1QTNF7	0.286589	0.293368	0.26904	0.939005
C1R	0.446291	0.0591447	0.279285	0.893964
C1RL	-0.1647	0.454607	-0.126286	0.953002
C1RL-AS1	-0.438776	0.0367586	-0.311886	0.893964
C1S	0.373661	0.148606	0.407437	0.903293
C20orf194	0.0793648	0.257407	0.0479984	0.935637
C20orf196	0.248484	0.334658	0.285249	0.939005
C20orf203	-0.237899	0.353509	-0.168695	0.939005
C20orf27	0.218026	0.385804	0.226482	0.939005
C20orf96	-0.174173	0.419656	-0.113755	0.943566
C21orf2	-0.119121	0.584667	-0.114385	0.973864
C21orf58	0.0125566	0.959507	-0.00439947	0.996091
C21orf59	-0.295244	0.0634245	-0.300797	0.893964
C21orf91	0.198676	0.312928	0.112762	0.939005
C22orf23	-0.0322605	0.892367	-0.0342788	0.993634
C22orf24	-0.167276	0.535406	-0.0987519	0.968991
C22orf29	-0.134276	0.23887	-0.0742685	0.931729
C22orf34	0.472007	0.167081	0.370444	0.903293
C22orf39	-0.106447	0.407777	-0.118179	0.943289
C22orf46	0.238528	0.304676	0.154313	0.939005
C2CD2	-0.016665	0.881066	-0.0165244	0.992883
C2CD2L	0.0356466	0.82938	0.108776	0.98782
C2CD3	-0.0352167	0.649719	-0.0543735	0.978203
C2CD4C	-0.212535	0.391169	-0.125853	0.939005
C2CD4D	-0.235043	0.29632	-0.159506	0.939005
C2CD5	-0.0684847	0.592007	-0.035311	0.973864
C2orf15	-0.186443	0.452317	-0.0804211	0.952008
C2orf16	0.191388	0.416125	0.174931	0.943289
C2orf42	-0.157084	0.370994	-0.208734	0.939005
C2orf47	0.297412	0.166424	0.313161	0.903293
C2orf49	0.308416	0.0345238	0.24216	0.893964
C2orf50	-0.0254046	0.907114	-0.125276	0.994654
C2orf68	-0.0510754	0.785482	-0.062799	0.984719
C2orf69	-0.186012	0.320638	-0.170942	0.939005
C2orf72	0.00907852	0.941693	0.0158784	0.99599
C2orf74	-0.152066	0.414756	-0.177427	0.943289
C2orf76	0.0281679	0.880966	0.0859212	0.992883
C2orf80	-0.381279	0.129	-0.404377	0.902775
C2orf82	0.225748	0.435545	0.196689	0.947598
C2orf88	-0.0450208	0.783051	-0.0710399	0.98438
C3	-0.0143106	0.941936	-0.0231351	0.99599
C3AR1	0.113838	0.634111	0.144725	0.97775
C3orf14	-0.060901	0.79052	-0.117952	0.98529
C3orf18	-0.0354475	0.818588	-0.0256812	0.986729
C3orf20	-0.489612	0.0378283	-0.418576	0.893964
C3orf33	0.183759	0.306771	0.20057	0.939005
C3orf35	-0.0314219	0.863218	0.048761	0.990672
C3orf38	0.226352	0.16002	0.178307	0.903293
C3orf49	0.374756	0.162502	0.401349	0.903293
C3orf58	0.0520514	0.752899	0.00209597	0.982772
C3orf62	0.17049	0.326545	0.224447	0.939005
C3orf67	-0.0838695	0.759745	-0.188369	0.982772
C3orf70	-0.0733017	0.625069	-0.0832229	0.976828
C3orf80	0.00967139	0.967656	-0.0780829	0.997265
C4orf19	0.320215	0.158626	0.134139	0.903293
C4orf3	0.0182106	0.875954	-0.0239202	0.99157
C4orf32	0.044658	0.845641	-0.115672	0.987992
C4orf33	-0.199908	0.348133	-0.289727	0.939005
C4orf46	-0.0962408	0.64137	-0.181419	0.978203
C4orf47	-0.167094	0.455921	-0.141864	0.953545
C4orf48	-0.208716	0.307162	-0.18625	0.939005
C4orf50	-0.2096	0.0941784	-0.14137	0.893964
C5	0.205633	0.321864	0.178951	0.939005
C5AR1	0.273765	0.151081	0.220101	0.903293
C5orf15	-0.189471	0.332661	-0.105005	0.939005
C5orf22	-0.0251687	0.91609	-0.0385299	0.994654
C5orf24	0.0580633	0.555404	0.013404	0.969733
C5orf30	0.127832	0.29769	0.097953	0.939005
C5orf34	0.192684	0.44493	0.120577	0.947727
C5orf42	-0.0432794	0.661974	-0.0498676	0.978203
C5orf45	-0.0807717	0.671846	-0.0393739	0.978203
C5orf49	-0.0638119	0.766707	0.0051379	0.982772
C5orf51	-0.0161244	0.893804	-0.0117061	0.993634
C5orf56	0.242935	0.342123	0.153121	0.939005
C5orf63	0.07648	0.712691	0.0100067	0.97935
C5orf64	-0.14563	0.523301	-0.059481	0.968991
C5orf66	0.238417	0.328976	0.161824	0.939005
C6orf1	0.098221	0.59962	0.169767	0.974076
C6orf106	-0.0399766	0.607193	-0.0104921	0.974076
C6orf118	0.110375	0.651134	-0.0069168	0.978203
C6orf120	-0.206666	0.278197	-0.169653	0.939005
C6orf163	-0.281758	0.172757	-0.274204	0.903293
C6orf201	-0.19731	0.435344	-0.22229	0.947598
C6orf203	0.192426	0.32094	0.0674017	0.939005
C6orf62	-0.00875596	0.924284	0.0060638	0.995264
C6orf89	-0.0559447	0.373797	-0.0656953	0.939005
C7	0.306169	0.247118	0.256582	0.933861
C7orf13	-0.182939	0.347704	-0.147768	0.939005
C7orf25	-0.12296	0.490332	-0.140037	0.960393
C7orf26	0.089109	0.620396	0.125367	0.975389
C7orf31	0.143326	0.560944	0.288981	0.969733
C7orf43	0.105158	0.622873	0.0673017	0.975965
C7orf49	0.314849	0.0943616	0.237032	0.893964
C7orf50	0.0615163	0.78327	0.145716	0.98438
C7orf61	0.0395778	0.887086	0.0759078	0.993194
C7orf71	-0.0603834	0.777045	0.00747432	0.982772
C7orf73	-0.0428442	0.794874	-0.0624582	0.98529
C8orf33	0.047055	0.688136	0.0921169	0.978203
C8orf34	0.0818755	0.740398	0.0910425	0.981274
C8orf37	-0.353572	0.122957	-0.433626	0.899041
C8orf4	-0.0636522	0.754447	-0.133113	0.982772
C8orf44	-0.290697	0.222793	-0.246448	0.921922
C8orf46	-0.160445	0.0808666	-0.159278	0.893964
C8orf48	0.0080601	0.971768	-0.153757	0.997685
C8orf58	0.035022	0.885195	-0.0615414	0.993194
C8orf59	0.0972343	0.67886	0.0781304	0.978203
C8orf82	0.25261	0.26028	0.146253	0.935637
C8orf88	0.368229	0.0952149	0.275828	0.893964
C9orf131	0.0181278	0.901666	0.0481233	0.994318
C9orf139	-0.0171977	0.940995	-0.0904794	0.99599
C9orf142	0.0204573	0.938226	0.163567	0.99599
C9orf16	0.157872	0.649473	0.112668	0.978203
C9orf170	0.0942029	0.508728	0.0627177	0.966312
C9orf172	0.207377	0.518706	0.22659	0.968401
C9orf24	0.377021	0.0815733	0.30371	0.893964
C9orf3	0.0181451	0.832207	0.0820976	0.987845
C9orf40	0.0959923	0.674958	0.0622971	0.978203
C9orf41-AS1	-0.172363	0.417486	-0.198751	0.943358
C9orf47	-0.128204	0.470816	-0.1376	0.958241
C9orf64	-0.046195	0.855483	0.0556372	0.989458
C9orf69	0.00272139	0.988732	0.124835	0.998579
C9orf72	-0.083122	0.672974	-0.0238581	0.978203
C9orf78	-0.215757	0.121155	-0.205581	0.899041
C9orf84	-0.157631	0.496241	-0.0986045	0.960758
C9orf85	-0.0267968	0.903721	-0.11709	0.994585
CA1	-0.331736	0.157407	-0.395287	0.903293
CA10	0.00643847	0.975099	-0.0397822	0.997685
CA11	-0.0175457	0.880251	-0.0288982	0.992883
CA12	-0.173058	0.536462	-0.204015	0.968991
CA13	-0.0491009	0.813308	-0.0707727	0.985717
CA14	0.320051	0.142394	0.280581	0.903293
CA2	0.0208844	0.899094	-0.0415413	0.993831
CA3	-0.237233	0.201694	-0.271373	0.914764
CA4	-0.355925	0.110012	-0.114713	0.893964
CA5B	0.0404009	0.827077	-0.00636998	0.987215
CA5BP1	-0.0238212	0.910476	-0.0437807	0.994654
CA7	-0.227996	0.247607	-0.229155	0.933861
CA8	0.148646	0.459189	0.0867738	0.955181
CAAP1	-0.150678	0.482302	-0.18615	0.959191
CAB39	-0.0234755	0.83832	-0.00336029	0.987845
CAB39L	-0.0207116	0.86068	-0.0961811	0.990672
CABIN1	-0.0755483	0.555467	-0.0160924	0.969733
CABLES1	0.0710836	0.697769	-0.0221743	0.978203
CABLES2	-0.429256	0.0240253	-0.295772	0.893964
CABP1	-0.206846	0.170621	-0.0689083	0.903293
CABP4	0.543105	0.00785589	0.569335	0.83425
CABP7	-0.0791142	0.791367	-0.058775	0.98529
CABYR	-0.448969	0.0245267	-0.254587	0.893964
CACFD1	0.0851376	0.755655	0.124603	0.982772
CACHD1	0.118718	0.31988	0.107163	0.939005
CACNA1A	-0.192857	0.106037	-0.107616	0.893964
CACNA1B	-0.232256	0.0330245	-0.151688	0.893964
CACNA1C	-0.0976469	0.312369	-0.0575531	0.939005
CACNA1C-AS1	0.404073	0.0757697	0.393338	0.893964
CACNA1C-AS2	-0.352231	0.162156	-0.360555	0.903293
CACNA1C-AS4	0.0486952	0.83638	-0.0437299	0.987845
CACNA1C-IT3	0.173442	0.455521	0.0175096	0.953545
CACNA1D	-0.326564	0.00944249	-0.240568	0.840223
CACNA1E	-0.282647	0.0155435	-0.207994	0.876736
CACNA1G	0.0866989	0.700152	0.15517	0.978203
CACNA1H	0.166083	0.565379	0.0543052	0.970047
CACNA1I	-0.195843	0.263231	-0.11692	0.935637
CACNA2D1	-0.192863	0.26176	-0.175317	0.935637
CACNA2D2	-0.270044	0.154026	-0.220146	0.903293
CACNA2D3	-0.305128	0.0347922	-0.221353	0.893964
CACNA2D3-AS1	-0.0418777	0.840408	-0.0492876	0.987845
CACNA2D4	0.438225	0.0404984	0.45632	0.893964
CACNB1	-0.209312	0.0916688	-0.203948	0.893964
CACNB2	-0.228913	0.0810073	-0.203616	0.893964
CACNB3	-0.150107	0.337088	-0.106344	0.939005
CACNB4	-0.252967	0.205889	-0.177419	0.914764
CACNG2	-0.066828	0.571657	-0.0149653	0.970318
CACNG3	-0.0962659	0.564885	-0.024405	0.970047
CACNG4	0.0428048	0.84499	0.0272192	0.987849
CACNG5	0.429252	0.0516916	0.395764	0.893964
CACNG7	0.0348526	0.862332	0.00320243	0.990672
CACNG8	-0.217632	0.0932326	-0.118608	0.893964
CACTIN	0.422408	0.0543384	0.419377	0.893964
CACUL1	-0.0605385	0.571893	-0.0628143	0.970504
CACYBP	-0.150284	0.421714	-0.109299	0.944485
CAD	0.130868	0.344867	0.161521	0.939005
CADM1	0.0407703	0.647665	0.0121094	0.978203
CADM2	-0.043574	0.764174	-0.0403659	0.982772
CADM2-AS1	-0.541414	0.0178543	-0.42455	0.893964
CADM2-AS2	0.191638	0.426899	0.232277	0.945475
CADM3	-0.150455	0.0966614	-0.133081	0.893964
CADM3-AS1	-0.0545654	0.762213	-0.0724259	0.982772
CADM4	0.135354	0.389472	0.103446	0.939005
CADPS	-0.386649	0.0393685	-0.292887	0.893964
CADPS2	-0.0452231	0.77926	-0.0392011	0.983168
CALB1	-0.506109	0.0643431	-0.401597	0.893964
CALB2	-0.50434	0.0134775	-0.568019	0.867321
CALCOCO1	-0.150591	0.0781015	-0.101668	0.893964
CALCOCO2	0.165806	0.104532	0.134216	0.893964
CALCRL	0.00679795	0.970982	-0.0231177	0.997685
CALD1	0.256151	0.0366776	0.209441	0.893964
CALHM1	0.175884	0.408218	0.166196	0.943289
CALHM2	0.259104	0.214793	0.181386	0.920538
CALM1	-0.179798	0.282	-0.145589	0.939005
CALM2	-0.081948	0.598077	-0.0688687	0.974076
CALM3	-0.2189	0.0258358	-0.16271	0.893964
CALML4	-0.258579	0.170657	-0.157588	0.903293
CALN1	0.0625834	0.555425	0.0261487	0.969733
CALR	0.150133	0.181324	0.101644	0.906212
CALU	0.0169357	0.879584	-0.0780018	0.992883
CALY	-0.338291	0.107076	-0.378352	0.893964
CAMK1	-0.165354	0.318086	-0.136487	0.939005
CAMK1D	-0.102457	0.178636	-0.0678667	0.906212
CAMK1G	-0.241651	0.17924	-0.260749	0.906212
CAMK2A	-0.250217	0.00531598	-0.188928	0.83425
CAMK2B	-0.120026	0.356519	-0.0596947	0.939005
CAMK2D	-0.247539	0.14727	-0.172034	0.903293
CAMK2G	-0.0438269	0.508984	-0.0675082	0.966312
CAMK2N1	-0.17879	0.0245563	-0.190401	0.893964
CAMK2N2	-0.364089	0.0267555	-0.269115	0.893964
CAMK4	-0.144548	0.523339	-0.168259	0.968991
CAMKK1	-0.270372	0.0470596	-0.193681	0.893964
CAMKK2	-0.210687	0.0224882	-0.156956	0.893964
CAMKMT	0.0205718	0.920507	0.132659	0.994654
CAMKV	-0.426878	0.000576145	-0.326582	0.83425
CAMLG	-0.217943	0.146598	-0.197529	0.903293
CAMSAP1	-0.0477866	0.517094	-0.0256541	0.968401
CAMSAP2	-0.0558804	0.571356	-0.0628694	0.970243
CAMSAP3	-0.383183	0.174594	-0.251829	0.903791
CAMTA1	-0.0687067	0.530851	-0.00408015	0.968991
CAMTA2	-0.0859178	0.61519	-0.0356279	0.974351
CAND1	-0.0618003	0.664033	-0.0615566	0.978203
CAND2	-0.138065	0.388884	-0.0513231	0.939005
CANT1	-0.227799	0.301633	-0.204402	0.939005
CANX	0.0202066	0.826125	-0.00921649	0.987215
CAP1	0.119216	0.220234	0.0612185	0.921922
CAP2	-0.342922	0.10678	-0.277887	0.893964
CAPG	0.290389	0.249974	0.281433	0.934339
CAPN1	0.130977	0.444811	0.148144	0.947727
CAPN10	-0.087857	0.762296	-0.0517938	0.982772
CAPN10-AS1	0.186588	0.389736	0.243568	0.939005
CAPN14	-0.0341608	0.863422	-0.0249264	0.990672
CAPN15	-0.0407749	0.890162	0.0144898	0.993628
CAPN2	0.0756341	0.547949	0.0210582	0.968991
CAPN3	0.285928	0.039232	0.239392	0.893964
CAPN5	-0.191252	0.252269	-0.0695914	0.934425
CAPN7	-0.0198663	0.887805	-0.0259091	0.993601
CAPN9	-0.0830643	0.785099	0.0237789	0.984719
CAPNS1	-0.0395069	0.719292	-0.0664891	0.97959
CAPRIN1	-0.0633658	0.525478	-0.0586422	0.968991
CAPRIN2	-0.0882773	0.478384	-0.0348461	0.959191
CAPS	0.424351	0.100082	0.304214	0.893964
CAPS2	-0.411686	0.0129483	-0.349727	0.860193
CAPZA1	0.08275	0.564631	0.0725397	0.970047
CAPZA2	-0.0188206	0.904317	-0.0400917	0.994654
CAPZB	0.0163368	0.865364	-0.0147806	0.990757
CARD10	0.535606	0.0575833	0.476453	0.893964
CARD11	0.0439358	0.86586	0.0574099	0.990757
CARD14	0.038856	0.867052	0.0406165	0.990757
CARD19	0.0789286	0.717351	0.0449965	0.97935
CARD6	0.436559	0.0665244	0.377748	0.893964
CARD8	0.0741249	0.575647	0.0870717	0.972038
CARD9	0.32895	0.170043	0.404475	0.903293
CARF	0.00212973	0.987864	0.0108513	0.998429
CARHSP1	-0.0182516	0.924662	-0.088919	0.995264
CARM1	-0.194893	0.239459	-0.127486	0.931729
CARMIL1	-0.102354	0.214608	-0.107154	0.920538
CARMIL2	-0.0521455	0.831432	-0.00239358	0.987845
CARMIL3	-0.12795	0.59577	-0.105619	0.973864
CARMN	0.354341	0.256302	0.274512	0.935637
CARNMT1	-0.0780384	0.644098	-0.0712602	0.978203
CARNS1	0.481331	0.0857033	0.54476	0.893964
CARS2	-0.0117705	0.924179	-0.0461896	0.995264
CARTPT	-0.199837	0.515593	-0.153532	0.968401
CASC1	-0.0932465	0.668665	-0.0799172	0.978203
CASC10	-0.223485	0.39166	-0.319409	0.939037
CASC15	0.212204	0.317426	0.164313	0.939005
CASC2	0.0959849	0.70131	0.0505461	0.978203
CASC3	0.144685	0.241938	0.0744377	0.932035
CASC4	0.0542794	0.568651	-0.00890999	0.970192
CASD1	-0.0961462	0.610773	-0.101796	0.974076
CASK	-0.0397077	0.713378	-0.0482883	0.97935
CASKIN1	0.0909663	0.768795	0.141503	0.982772
CASKIN2	0.251492	0.414172	0.220214	0.943289
CASP1	-0.0440843	0.881412	-0.0844383	0.992883
CASP10	0.421167	0.0806522	0.311071	0.893964
CASP2	-0.0196264	0.901254	-0.0031004	0.994152
CASP3	0.12315	0.54378	0.115077	0.968991
CASP4	0.0716715	0.783442	0.166462	0.98438
CASP6	0.139865	0.551494	0.191066	0.969038
CASP7	0.141306	0.485499	0.181593	0.959191
CASP8	0.475063	0.0207443	0.358938	0.893964
CASP8AP2	0.00824038	0.943018	-0.00747261	0.99599
CASP9	-0.0756078	0.686266	0.00594834	0.978203
CASQ1	0.0583292	0.804671	0.0607636	0.985355
CASS4	0.284192	0.19358	0.238994	0.907434
CAST	-0.018423	0.781795	0.0110803	0.984061
CASZ1	-0.337864	0.274149	-0.231753	0.93805
CAT	0.082242	0.578148	0.0200448	0.972826
CATSPER2	-0.0123242	0.957251	0.0142785	0.99599
CATSPERG	0.1334	0.483478	0.113379	0.959191
CAV1	0.384742	0.116619	0.274926	0.895406
CAV2	-0.235365	0.297428	-0.340672	0.939005
CBARP	-0.610815	0.056133	-0.48309	0.893964
CBFA2T2	0.0483086	0.578546	0.0713024	0.972847
CBFA2T3	-0.00892054	0.968688	0.0485818	0.997669
CBFB	0.38026	0.0167237	0.25774	0.887229
CBL	0.0395453	0.65268	0.000270353	0.978203
CBLB	0.115365	0.530902	0.0501322	0.968991
CBLL1	-0.0482598	0.774513	0.0133169	0.982772
CBLN1	-0.043455	0.808792	-0.128051	0.985355
CBLN2	-0.301589	0.138836	-0.247277	0.903293
CBLN4	0.119322	0.644282	0.1368	0.978203
CBR1	0.179847	0.235883	0.151264	0.929476
CBR3	-0.220019	0.369008	-0.0415367	0.939005
CBR3-AS1	-0.0385628	0.88631	-0.0976486	0.993194
CBR4	0.0543214	0.713647	-0.0140173	0.97935
CBS	0.529612	0.0224266	0.379509	0.893964
CBSL	-0.153499	0.417694	-0.22472	0.943358
CBWD1	-0.0449595	0.844683	-0.0125182	0.987845
CBWD2	0.0783133	0.695451	-0.0282436	0.978203
CBWD5	0.125922	0.644021	0.175636	0.978203
CBX1	0.244866	0.0643684	0.128054	0.893964
CBX3	-0.061259	0.619677	-0.0406163	0.97504
CBX4	0.138282	0.445226	0.126217	0.947727
CBX5	0.0361386	0.559323	-0.0130765	0.969733
CBX6	-0.0506382	0.753451	-9.77e-05	0.982772
CBX7	-0.119079	0.410179	-0.110125	0.943289
CBY1	0.0108986	0.954265	-0.0839563	0.99599
CC2D1A	0.0250595	0.90762	0.0825378	0.994654
CC2D1B	-0.113321	0.4736	-0.0850467	0.958916
CC2D2A	0.122142	0.315552	0.122346	0.939005
CC2D2B	0.551087	0.00554118	0.436654	0.83425
CCAR1	0.0927433	0.400632	0.0687393	0.94283
CCAR2	0.0103929	0.913935	0.0424632	0.994654
CCBE1	-0.147405	0.526408	-0.0668886	0.968991
CCDC102B	0.0309609	0.867511	0.0441554	0.990757
CCDC103	-0.242718	0.335387	-0.195952	0.939005
CCDC106	0.279395	0.318412	0.200865	0.939005
CCDC110	-0.31838	0.172343	-0.168605	0.903293
CCDC112	-0.139687	0.540915	-0.226516	0.968991
CCDC113	-0.221774	0.225755	-0.173186	0.9245
CCDC115	0.25497	0.117653	0.304663	0.896851
CCDC117	-0.0295081	0.846267	-0.0908878	0.988191
CCDC12	0.0994272	0.618198	0.0656821	0.97467
CCDC120	-0.0291101	0.89967	-0.00722305	0.993831
CCDC121	0.514499	0.00868097	0.411986	0.83425
CCDC122	-0.20217	0.381515	-0.225497	0.939005
CCDC124	-0.0995318	0.773411	-0.0999945	0.982772
CCDC126	0.0450377	0.819935	0.0138687	0.986791
CCDC127	-0.0989759	0.613852	-0.222467	0.974351
CCDC129	-0.384897	0.0881838	-0.365541	0.893964
CCDC13	0.0636792	0.760918	0.127409	0.982772
CCDC130	0.219036	0.300374	0.208906	0.939005
CCDC134	0.238298	0.215541	0.170032	0.920553
CCDC136	-0.220641	0.0194464	-0.152726	0.893964
CCDC137	-0.13145	0.516902	-0.244718	0.968401
CCDC138	-0.217991	0.293772	-0.110667	0.939005
CCDC14	0.183985	0.20403	0.187046	0.914764
CCDC141	0.340934	0.13938	0.357152	0.903293
CCDC142	-0.296627	0.128425	-0.167232	0.902775
CCDC144A	0.0965812	0.572713	0.171683	0.970947
CCDC144B	0.0696736	0.69604	0.0767369	0.978203
CCDC144CP	0.111995	0.504995	0.120639	0.965448
CCDC144NL	0.0232879	0.929316	0.115185	0.995621
CCDC146	-0.0729658	0.680609	-0.0787823	0.978203
CCDC148	-0.200051	0.387674	-0.109806	0.939005
CCDC149	0.039274	0.607416	0.0393276	0.974076
CCDC15	0.113304	0.545763	0.104703	0.968991
CCDC151	0.203855	0.375138	0.197925	0.939005
CCDC152	-0.456831	0.0398222	-0.46734	0.893964
CCDC154	0.204997	0.439796	0.241093	0.947727
CCDC158	0.202593	0.317479	0.117345	0.939005
CCDC159	0.117156	0.593456	0.0468093	0.973864
CCDC160	0.304932	0.160096	0.183034	0.903293
CCDC163	-0.388767	0.100546	-0.473626	0.893964
CCDC167	-0.0669497	0.769285	0.0131201	0.982772
CCDC168	-0.243895	0.30067	-0.12264	0.939005
CCDC17	0.452352	0.0675318	0.326664	0.893964
CCDC170	0.487824	0.0628835	0.415772	0.893964
CCDC171	-0.132107	0.375494	-0.10796	0.939005
CCDC173	0.146343	0.544087	0.0994615	0.968991
CCDC174	-0.224423	0.125545	-0.153179	0.900985
CCDC175	-0.0547573	0.774198	-0.0522769	0.982772
CCDC177	-0.141568	0.494332	-0.0102283	0.960607
CCDC18	-0.151813	0.358686	-0.150748	0.939005
CCDC18-AS1	0.126711	0.409262	0.153596	0.943289
CCDC181	0.0887912	0.675913	-0.00625395	0.978203
CCDC183	-0.248426	0.281815	-0.075709	0.939005
CCDC183-AS1	-0.177339	0.472354	-0.0315977	0.958753
CCDC184	-0.227043	0.351741	-0.14177	0.939005
CCDC186	-0.122847	0.383606	-0.105493	0.939005
CCDC190	0.145821	0.598141	0.148292	0.974076
CCDC191	0.0923715	0.599946	0.064406	0.974076
CCDC22	-0.0526772	0.840494	0.0278288	0.987845
CCDC24	0.110245	0.622665	0.00264378	0.975939
CCDC25	0.149669	0.295582	0.0769263	0.939005
CCDC28A	-0.037869	0.849677	-0.0678655	0.988649
CCDC28B	-0.0760705	0.708115	0.0695644	0.97869
CCDC3	-0.0111605	0.910416	0.0500064	0.994654
CCDC30	-0.366847	0.00440665	-0.296764	0.83425
CCDC34	0.136992	0.596056	0.0600253	0.973864
CCDC36	0.00682032	0.976493	-0.161819	0.997685
CCDC38	0.361636	0.0767505	0.344018	0.893964
CCDC39	-0.08465	0.704881	-0.021147	0.978203
CCDC40	-0.169892	0.474774	-0.0640972	0.958916
CCDC43	0.140476	0.441511	0.0540135	0.947727
CCDC47	0.149671	0.159571	0.0765737	0.903293
CCDC50	0.0735339	0.444753	0.05509	0.947727
CCDC51	-0.00523465	0.98353	0.191212	0.997685
CCDC53	0.1317	0.470083	0.123611	0.958166
CCDC57	-0.167363	0.26592	-0.0746859	0.935637
CCDC58	0.627884	0.00138538	0.495492	0.83425
CCDC59	0.149053	0.446154	0.146044	0.947929
CCDC6	-0.182195	0.140244	-0.146807	0.903293
CCDC60	0.0599348	0.743533	-0.0777371	0.981601
CCDC61	-0.18609	0.378354	-0.0524893	0.939005
CCDC62	0.0638531	0.73521	0.023598	0.98024
CCDC65	-0.0695825	0.722272	-0.0711601	0.98024
CCDC66	-0.142799	0.283554	-0.187762	0.939005
CCDC68	-0.105723	0.680714	-0.0899619	0.978203
CCDC69	-0.117176	0.561098	-0.18025	0.969733
CCDC7	0.0672774	0.493584	0.0633578	0.960607
CCDC71	0.190369	0.262315	0.16494	0.935637
CCDC71L	0.160995	0.453506	0.155357	0.952376
CCDC74A	0.00227216	0.990673	0.0483466	0.998745
CCDC74B	-0.200776	0.285009	-0.151559	0.939005
CCDC77	-0.105848	0.562507	-0.144919	0.969733
CCDC78	0.0482224	0.87495	0.0813951	0.991507
CCDC8	0.326645	0.154894	0.217027	0.903293
CCDC80	0.328237	0.211115	0.307236	0.919732
CCDC81	0.0142068	0.956068	0.268741	0.99599
CCDC82	0.0734911	0.560748	0.0463052	0.969733
CCDC84	-0.250468	0.198454	-0.141723	0.911489
CCDC85A	-0.285263	0.136201	-0.174501	0.903293
CCDC85B	0.162087	0.589338	0.0579975	0.973864
CCDC85C	0.0712724	0.720225	0.00757087	0.979915
CCDC86	0.00822907	0.97317	-0.0672266	0.997685
CCDC88A	0.138029	0.101137	0.134841	0.893964
CCDC88B	0.0555015	0.848982	0.140592	0.988649
CCDC88C	-0.203818	0.36253	-0.196396	0.939005
CCDC9	-0.0257336	0.90065	0.0892883	0.993986
CCDC90B	0.251604	0.110223	0.158909	0.893964
CCDC91	-0.141691	0.237733	-0.198019	0.931441
CCDC92	0.40516	0.0169499	0.433618	0.887229
CCDC93	0.0628085	0.49555	0.0439351	0.960607
CCDC94	-0.18857	0.342802	-0.173329	0.939005
CCDC97	-0.233781	0.329033	-0.252121	0.939005
CCK	-0.309252	0.0594007	-0.235105	0.893964
CCKBR	-0.0220475	0.90201	-0.0604241	0.994358
CCM2	-0.194813	0.422014	-0.144697	0.944485
CCM2L	-0.0733405	0.748834	-0.0692282	0.98208
CCNA1	0.0134166	0.950145	0.0607957	0.99599
[truncated: 13,347 more rows]
