# Supplementary material for: Psychosis in Alzheimer’s Disease is Associated with Excitatory Neuron Vulnerability and Post-Transcriptional Mechanisms Altering Synaptic Protein Levels
Source: medRxiv preprint, doi:10.1101/2021.09.07.21262904, version 2 (2021-11-11)
Supplement: Supplemental File 2 [file 262904_file05.xlsx]

## Sheet: Read_Me
Legend	Description
Gene Symbol	Human Entrez Gene Symbol
Module	WGCNA Module Assignment
log2FC	Log2(AD-P:AD+P)
p.value	Nominal Significance value
mean_diff_raw	Difference between Log2(AD+P) and Log2(AD-P) without adjustment to any covariate
q.value	False Discovery Rate value

## Sheet: Data_S_02
Gene Symbol	log2FC	p.value	mean_diff_raw	q.value
A1BG-AS1	0.272119	0.298647	0.21034	0.808373
A2M	-0.0335804	0.773169	0.0863461	0.956393
A2M-AS1	0.0816156	0.747875	0.27171	0.948817
A2ML1	0.061973	0.732823	0.0438995	0.943666
A4GALT	-0.442839	0.095532	-0.0924957	0.726657
AA06	0.220472	0.367558	0.199083	0.832935
AAAS	-0.0682952	0.728342	-0.0711733	0.942689
AACS	-0.173551	0.235348	-0.237865	0.792332
AADAT	0.234516	0.217006	0.209342	0.784494
AAED1	0.0111764	0.967572	-0.0642215	0.995139
AAGAB	0.195015	0.25234	0.0265329	0.795142
AAK1	-0.00684625	0.917647	-0.159835	0.987246
AAMDC	0.250779	0.131717	0.22359	0.7461
AAMP	0.0153703	0.896398	-0.0608763	0.984832
AANAT	0.14169	0.597791	0.134621	0.908119
AAR2	-0.0838615	0.699691	-0.0496639	0.935791
AARS	0.0765042	0.273764	-0.0275294	0.797117
AARS2	-0.00639178	0.973013	-0.0605269	0.995662
AASDH	0.265231	0.130065	0.152411	0.7461
AASDHPPT	0.0775715	0.587527	-0.278318	0.905391
AASS	-0.145476	0.24721	0.0751957	0.792979
AATBC	0.0355638	0.882601	0.176686	0.981775
AATK	-0.282378	0.392856	0.228848	0.843577
ABAT	-0.0532042	0.26863	-0.00906267	0.797117
ABCA1	-0.139738	0.222199	-0.0782684	0.788611
ABCA10	0.195514	0.266964	-0.0584206	0.797117
ABCA11P	0.0589734	0.77603	0.0862636	0.956932
ABCA17P	0.234271	0.282237	0.139237	0.800122
ABCA2	-0.330662	0.193994	0.174911	0.776436
ABCA3	-0.226341	0.171377	-0.0267434	0.757427
ABCA4	-0.0543944	0.833763	-0.0405372	0.97148
ABCA5	0.124612	0.369011	-0.0724019	0.833752
ABCA6	-0.0043986	0.977909	0.063426	0.995679
ABCA7	-0.408866	0.105006	-0.0236328	0.734133
ABCA8	0.203704	0.232569	0.434619	0.792269
ABCA9	0.060006	0.664605	0.0953053	0.928509
ABCB1	0.207896	0.193643	0.25753	0.776436
ABCB10	-0.310804	0.0566137	-0.252057	0.713648
ABCB6	-0.219592	0.136358	-0.261718	0.7461
ABCB7	0.0491862	0.76666	-0.0670782	0.955034
ABCB8	-0.313908	0.0722823	-0.0975976	0.724336
ABCB9	-0.238014	0.259193	-0.093316	0.795934
ABCC10	-0.302646	0.14458	-0.178556	0.751924
ABCC12	-0.345988	0.146254	-0.501307	0.751924
ABCC2	-0.55419	0.00622526	-0.255893	0.616144
ABCC3	-0.21271	0.407317	-0.211364	0.847161
ABCC4	-0.0410158	0.796883	-0.0665937	0.962095
ABCC5	-0.0106882	0.88661	-0.0861712	0.983234
ABCC8	-0.23881	0.127177	-0.236803	0.74498
ABCC9	0.0290733	0.835373	0.157999	0.972123
ABCD2	0.427404	0.027106	0.210737	0.691683
ABCD3	-0.0251832	0.852188	0.0136611	0.975008
ABCD4	-0.260534	0.0662333	-0.139904	0.724336
ABCE1	0.250618	0.185923	-0.00216183	0.772982
ABCF2	-0.0350523	0.702652	-0.0735103	0.936211
ABCF3	-0.0861146	0.429178	-0.114205	0.854388
ABCG1	-0.0835073	0.381887	-0.0386156	0.83817
ABCG2	0.184873	0.309638	0.238223	0.815045
ABCG4	-0.286777	0.157837	-0.170501	0.753022
ABCG5	0.11086	0.630585	-0.0347736	0.920301
ABCG8	-0.325457	0.122251	-0.473384	0.743707
ABHD1	-0.555549	0.0292249	-0.331079	0.693548
ABHD10	0.198144	0.269356	0.0593446	0.797117
ABHD11	-0.272093	0.317761	-0.229103	0.816031
ABHD12	-0.237611	0.0356774	-0.137879	0.693548
ABHD12B	-0.538411	0.065052	-0.772072	0.724336
ABHD13	0.364704	0.0480824	0.106536	0.70819
ABHD14A	0.254297	0.202322	0.142318	0.776436
ABHD14B	-0.0089071	0.963828	0.385195	0.994418
ABHD15	-0.543747	0.0231116	-0.195978	0.682183
ABHD17A	-0.356136	0.0923811	0.0554523	0.724997
ABHD17B	0.0910615	0.427406	0.140287	0.853697
ABHD17C	-0.185241	0.313575	-0.227873	0.815583
ABHD18	0.0189999	0.921073	-0.145495	0.987494
ABHD2	-0.0797759	0.27109	-0.0652405	0.797117
ABHD3	-0.0971682	0.614984	-0.127083	0.914657
ABHD4	-0.237122	0.271345	-0.098128	0.797117
ABHD5	0.271722	0.0781226	0.188489	0.724336
ABHD6	0.0861734	0.594188	-0.0812026	0.906673
ABHD8	-0.379823	0.131221	-0.0308943	0.7461
ABI1	0.234429	0.0544465	0.062498	0.71049
ABI2	0.109185	0.13296	-0.00885064	0.7461
ABI3	-0.134365	0.578375	0.142572	0.903383
ABI3BP	0.265009	0.29724	0.102084	0.80767
ABL1	-0.0449284	0.76397	0.223637	0.954247
ABL2	0.250126	0.00149657	0.080557	0.616144
ABLIM1	0.0479846	0.44856	0.0589697	0.8651
ABLIM2	-0.202215	0.114205	-0.216494	0.739781
ABLIM3	-0.0015694	0.989848	0.0969915	0.997602
ABR	-0.178133	0.542065	-0.139551	0.894256
ABRACL	0.30939	0.208481	0.0684215	0.778911
ABT1	0.470976	0.0333845	0.434565	0.693548
ABTB1	-0.104522	0.664912	-0.000906371	0.928509
ABTB2	-0.243907	0.32782	0.172792	0.820504
ACAA1	-0.253132	0.131504	-0.117657	0.7461
ACAA2	-0.23229	0.110886	-0.055322	0.73497
ACACA	0.208942	0.326842	0.0622943	0.820136
ACACB	-0.117693	0.478562	0.0586268	0.872311
ACAD10	-0.0304157	0.822386	0.0957891	0.968411
ACAD11	0.213634	0.422274	0.282401	0.853573
ACAD8	-0.0306992	0.81024	-0.0282913	0.965583
ACAD9	-0.0124182	0.92936	0.0195709	0.988286
ACADL	0.273158	0.31634	0.221374	0.815966
ACADM	0.144356	0.239622	0.00793114	0.792332
ACADS	-0.403709	0.202027	-0.00724766	0.776436
ACADSB	0.0477547	0.752307	-0.136047	0.949601
ACADVL	-0.112338	0.355362	-0.0577708	0.825243
ACAN	0.384169	0.0879836	0.437441	0.724997
ACAP1	-0.0626571	0.840619	0.0133929	0.973556
ACAP2	0.149078	0.138801	0.0763622	0.747036
ACAP3	-0.386257	0.131434	-0.0264116	0.7461
ACAT1	0.309168	0.0762697	0.0874997	0.724336
ACAT2	0.154192	0.464536	-0.0198851	0.869439
ACBD3	0.193728	0.206926	0.0872288	0.778876
ACBD4	-0.241257	0.321312	-0.0242499	0.81804
ACBD5	-0.152293	0.118045	0.0098734	0.741036
ACBD6	-0.091754	0.620605	-0.13716	0.917338
ACBD7	-0.124226	0.427816	0.0547579	0.853697
ACCS	0.121257	0.610942	0.0744013	0.912541
ACD	0.167155	0.415775	0.185744	0.850731
ACE	0.121128	0.617002	0.133053	0.915298
ACER2	0.104454	0.577373	0.0864248	0.902845
ACER3	0.0301255	0.827931	0.0393671	0.969954
ACHE	-0.144541	0.59072	-0.383931	0.905974
ACIN1	-0.0665268	0.436357	0.0752673	0.857612
ACKR1	-0.421363	0.155866	-0.480283	0.753022
ACKR3	0.11307	0.557266	0.0913851	0.898137
ACKR4	0.0813716	0.723903	-0.0437573	0.941594
ACLY	0.154021	0.15657	0.0240364	0.753022
ACMSD	-0.0420528	0.843273	0.105838	0.974082
ACO1	0.193726	0.150055	0.0984857	0.752775
ACO2	-0.129716	0.345823	-0.0322385	0.824346
ACOT1	0.129188	0.581046	0.0421135	0.9036
ACOT11	0.115195	0.589136	0.385322	0.905433
ACOT13	0.0314827	0.799071	0.0229809	0.962192
ACOT2	-0.199957	0.362622	-0.103508	0.829183
ACOT4	0.318284	0.224548	0.154054	0.791433
ACOT6	0.26362	0.231497	0.0628135	0.792269
ACOT7	-0.0236792	0.888522	0.0107028	0.983643
ACOT8	-0.000487535	0.998331	0.138053	0.999439
ACOT9	0.305535	0.125573	0.032975	0.74498
ACOX1	0.051041	0.570695	0.0917048	0.900924
ACOX2	0.210622	0.308126	0.111791	0.81391
ACOX3	-0.178023	0.243343	0.00989083	0.792332
ACP1	0.311885	0.0429667	0.17979	0.696269
ACP2	-0.160326	0.327414	-0.146551	0.82045
ACP6	-0.130313	0.486577	-0.141937	0.874357
ACRC	0.100859	0.660783	0.0585658	0.928023
ACSBG1	-0.124286	0.503213	0.154248	0.882347
ACSF2	-0.186873	0.36778	-0.211104	0.832935
ACSF3	-0.182815	0.426712	-0.123372	0.853697
ACSL1	-0.111994	0.404603	0.0149273	0.846087
ACSL3	0.297633	0.0136597	0.0704418	0.65523
ACSL4	0.321761	0.106985	-0.00903095	0.73497
ACSL5	0.0396943	0.847254	0.270116	0.974761
ACSL6	0.252043	0.0159151	0.0465718	0.65523
ACSM5	0.212677	0.46018	0.164383	0.869026
ACSM6	0.0826784	0.695327	0.0543575	0.933941
ACSS1	-0.0363409	0.825904	0.151302	0.969887
ACSS2	0.0209391	0.868279	0.159535	0.97771
ACSS3	-0.120607	0.41573	-0.0201139	0.850731
ACTA2	0.000337708	0.998929	-0.00920715	0.999444
ACTA2-AS1	-0.00577764	0.977613	-0.0923812	0.995662
ACTB	0.0403163	0.722814	0.0377604	0.941594
ACTC1	0.437226	0.0570043	0.265891	0.713648
ACTG1	0.0432364	0.698685	0.094971	0.935523
ACTG1P20	-0.277988	0.210334	-0.267411	0.780341
ACTG1P4	0.0517711	0.816922	-0.142708	0.967181
ACTL10	-0.393484	0.0532333	-0.297304	0.70819
ACTL6A	-0.159126	0.459648	-0.168304	0.868877
ACTL6B	0.185484	0.311952	-0.0547118	0.815583
ACTN1	-0.165511	0.199189	-0.158696	0.776436
ACTN2	-0.12049	0.329314	-0.0460599	0.822043
ACTN4	-0.0106358	0.946521	0.142261	0.99088
ACTR10	0.406817	0.0816041	0.0408838	0.724336
ACTR1A	0.0528306	0.550029	0.00981154	0.895882
ACTR1B	-0.107296	0.546472	0.100862	0.894256
ACTR2	0.14101	0.181378	-0.113739	0.770155
ACTR3	0.197818	0.229927	0.067054	0.791992
ACTR3B	0.384621	0.0231217	0.118816	0.682183
ACTR3C	-0.298326	0.186135	-0.330329	0.772982
ACTR5	0.111883	0.488251	-0.00798127	0.875013
ACTR6	0.57974	0.00592417	0.254542	0.616144
ACTR8	0.0546252	0.709854	-0.0860407	0.939817
ACVR1	-0.094075	0.518189	-0.0382813	0.888282
ACVR1B	-0.0063104	0.95524	-0.0618205	0.992552
ACVR1C	0.393301	0.0695666	0.0869478	0.724336
ACVR2A	0.0703146	0.610528	-0.0369065	0.912541
ACVR2B	-0.085925	0.300549	-0.0514437	0.810131
ACVRL1	-0.16375	0.509999	0.218458	0.885885
ACYP1	0.514391	0.0229608	0.179112	0.682183
ACYP2	-0.317271	0.125391	-0.329347	0.74498
ADA	-0.380571	0.102853	-0.219492	0.730209
ADAL	0.251805	0.186078	0.0615824	0.772982
ADAM10	0.283438	0.000741575	0.298832	0.616144
ADAM11	0.00387308	0.984441	0.0167635	0.997016
ADAM12	-0.0909677	0.683041	0.125207	0.930735
ADAM15	-0.0553789	0.8141	0.182108	0.966392
ADAM17	-0.126306	0.295159	-0.0971353	0.80767
ADAM19	0.193484	0.20517	0.13671	0.778351
ADAM1A	0.00650905	0.974112	-0.240415	0.995662
ADAM20	0.00979815	0.943652	-0.111676	0.990241
ADAM20P1	0.384423	0.147336	0.157457	0.751924
ADAM21	-0.196972	0.424687	-0.253762	0.853697
ADAM22	0.0418174	0.673856	-0.237738	0.929031
ADAM23	0.070511	0.547953	-0.24456	0.895047
ADAM28	0.551009	0.0121897	0.297291	0.65523
ADAM33	0.00334472	0.98915	0.299508	0.997418
ADAM7	-0.0674804	0.773293	-0.11707	0.956393
ADAM8	-0.331317	0.318114	-0.0110122	0.816031
ADAM9	0.108401	0.466032	0.0661246	0.869782
ADAMTS1	-0.094875	0.628261	0.177486	0.920006
ADAMTS10	-0.242103	0.258523	-0.049393	0.795688
ADAMTS13	-0.248239	0.250647	-0.0714726	0.794879
ADAMTS14	-0.12506	0.644541	0.317542	0.924246
ADAMTS16	0.247693	0.349419	0.0748996	0.82514
ADAMTS17	0.0271188	0.882257	0.0529303	0.981775
ADAMTS18	-0.497649	0.132047	-0.191128	0.7461
ADAMTS19	0.355436	0.0826931	0.0954138	0.724336
ADAMTS2	-0.338025	0.254333	-0.198392	0.795142
ADAMTS3	0.251704	0.31721	-0.20108	0.816031
ADAMTS4	-0.0182217	0.950128	0.375929	0.991454
ADAMTS5	-0.223007	0.413706	-0.249701	0.849669
ADAMTS6	0.122165	0.642986	-0.0143429	0.923751
ADAMTS8	0.0970487	0.602895	0.0947237	0.910363
ADAMTS9	-0.274453	0.308545	0.189401	0.814402
ADAMTS9-AS1	-0.37522	0.219697	-0.159849	0.786565
ADAMTS9-AS2	0.165547	0.378557	0.144405	0.838047
ADAMTSL1	-0.0287361	0.907978	-0.230096	0.985796
ADAMTSL2	-0.249931	0.450877	0.0503377	0.866373
ADAMTSL3	0.204747	0.15475	0.292935	0.753022
ADAMTSL4	-0.205053	0.430818	0.0549134	0.855054
ADAMTSL5	0.2455	0.440222	0.308136	0.859963
ADAP1	-0.178166	0.473907	0.105253	0.871439
ADAP2	-0.226982	0.264407	0.124718	0.797117
ADAR	-0.00293008	0.945603	0.0104111	0.990777
ADARB1	-0.0629834	0.56026	-0.107345	0.899628
ADARB2	-0.192696	0.222604	0.0321785	0.789117
ADARB2-AS1	-0.0399111	0.865327	-0.0786822	0.977306
ADAT1	-0.0845403	0.548942	-0.116197	0.895248
ADAT2	0.263733	0.206182	0.0565559	0.778876
ADCK1	-0.259123	0.187384	-0.0243702	0.772982
ADCK2	0.277798	0.176679	0.195495	0.763534
ADCK5	-0.309108	0.197235	-0.056264	0.776436
ADCY1	-0.0952029	0.276361	-0.106714	0.797117
ADCY10	0.0850941	0.726349	-0.112636	0.942127
ADCY10P1	0.187507	0.384794	0.23297	0.839145
ADCY2	-0.0264862	0.766326	-0.0410296	0.955023
ADCY3	-0.0331189	0.810294	0.105952	0.965583
ADCY4	-0.35733	0.181544	-0.106861	0.770155
ADCY5	-0.231736	0.111428	-0.0403557	0.736598
ADCY6	-0.132193	0.287504	-0.0314009	0.802128
ADCY7	-0.0350718	0.77654	0.0900004	0.957037
ADCY8	-0.161212	0.286056	-0.0796496	0.801954
ADCY9	-0.160273	0.229602	-0.118793	0.791435
ADCYAP1	0.0975384	0.755903	-0.280533	0.950884
ADCYAP1R1	-0.150189	0.0703905	0.0184807	0.724336
ADD1	-0.00265314	0.964143	0.0404546	0.994471
ADD2	0.0773564	0.283303	-0.132056	0.801263
ADD3	-0.0472579	0.642607	0.0302573	0.923751
ADD3-AS1	0.229162	0.378503	0.155084	0.838047
ADGRA1	-0.285251	0.0891124	-0.218707	0.724997
ADGRA2	0.245559	0.190199	0.226112	0.776436
ADGRA3	0.0808013	0.505628	0.177743	0.883947
ADGRB1	-0.374844	0.154346	0.0636271	0.753022
ADGRB2	-0.530152	0.0264369	-0.276115	0.691683
ADGRB3	0.117098	0.131651	-0.0737472	0.7461
ADGRD1	-0.376169	0.0795881	0.0782645	0.724336
ADGRE2	-0.355082	0.203729	-0.197139	0.777116
ADGRE5	-0.399011	0.086248	-0.0911784	0.724336
ADGRF3	-0.412694	0.0890999	-0.108648	0.724997
ADGRF5	0.022617	0.857698	-0.0169659	0.975345
ADGRG1	-0.282819	0.143153	0.153842	0.751924
ADGRG2	-0.0621527	0.814452	0.0230329	0.966485
ADGRG6	0.483679	0.137906	0.264472	0.7461
ADGRL1	-0.22783	0.243856	-0.048063	0.792332
ADGRL2	0.27571	0.00448286	0.0166372	0.616144
ADGRL3	0.0987273	0.178408	-0.000700679	0.764977
ADGRL4	0.22584	0.383202	0.138698	0.838172
ADGRV1	0.0672995	0.601048	0.0346063	0.909544
ADH1B	0.229166	0.416183	0.447812	0.850773
ADH5	0.00202318	0.989612	-0.057499	0.997602
ADHFE1	0.388731	0.117616	0.46945	0.741036
ADI1	0.045434	0.803871	-0.110731	0.963486
ADIPOR1	0.220186	0.00990321	0.189389	0.65523
ADIPOR2	-0.0794174	0.338928	0.127382	0.823159
ADIRF	-0.642317	0.0168515	-0.298884	0.65523
ADK	-0.069117	0.712573	-0.180276	0.940496
ADM	-0.285887	0.434679	-0.139142	0.856548
ADNP	0.0778913	0.401774	-0.0200527	0.844954
ADNP-AS1	-0.0228501	0.920349	-0.190252	0.987409
ADNP2	0.015077	0.924845	-0.0229272	0.987934
ADO	-0.0559403	0.755574	-0.168965	0.950884
ADORA1	-0.185682	0.32885	-0.00706354	0.821911
ADORA2A-AS1	-0.310037	0.226662	-0.188377	0.791435
ADORA2B	0.314482	0.257247	0.308345	0.795428
ADORA3	0.212414	0.315495	0.00468642	0.815583
ADPGK	0.118482	0.36333	-0.0441372	0.829183
ADPGK-AS1	-0.0622819	0.786321	-0.102239	0.959175
ADPRH	-0.192417	0.505192	-0.127014	0.883947
ADPRHL1	-0.0914932	0.648604	-0.0146208	0.925314
ADPRHL2	-0.128918	0.587075	-0.116148	0.905277
ADPRM	-0.566527	0.062749	-0.51738	0.724336
ADRA1A	0.0932002	0.327859	0.0284967	0.820504
ADRA1B	-0.070777	0.752981	0.0693687	0.949876
ADRA2A	-0.170923	0.358651	0.0128136	0.826882
ADRA2C	-0.146485	0.575244	0.00447337	0.902442
ADRB1	-0.0576941	0.769839	-0.17063	0.955237
ADRB2	0.0257934	0.893237	0.0851604	0.984389
ADRM1	0.113962	0.614366	0.20368	0.914657
ADSL	-0.279969	0.187805	-0.173373	0.773083
ADSS	0.199034	0.212401	0.040571	0.782121
ADSSL1	0.0835218	0.73601	0.136269	0.944535
ADTRP	-0.398353	0.142162	-0.541712	0.750586
AEBP1	-0.17987	0.47554	0.145352	0.872309
AEBP2	0.142161	0.159193	-0.034199	0.753301
AEN	-0.361939	0.121906	-0.210237	0.743707
AES	-0.208258	0.0909305	-0.071188	0.724997
AFAP1	-0.215494	0.0738416	-0.0957928	0.724336
AFAP1-AS1	-0.114495	0.656636	-0.212331	0.928023
AFAP1L1	0.163678	0.397487	0.330879	0.844137
AFAP1L2	-0.230226	0.0657582	0.0167723	0.724336
AFDN	0.0184141	0.774765	0.0719156	0.956736
AFF1	0.0242629	0.777236	0.0824601	0.957148
AFF2	0.287996	0.0688374	-0.0894698	0.724336
AFF3	-0.0897374	0.374156	-0.113346	0.836832
AFF4	0.0363352	0.59266	0.0158332	0.905974
AFG3L1P	0.00462346	0.977494	0.296259	0.995662
AFG3L2	0.273221	0.0289617	0.00433077	0.692591
AFMID	-0.0526739	0.786791	0.12125	0.959175
AFTPH	0.136205	0.253597	-0.0827857	0.795142
AGA	0.383458	0.155504	-0.0391888	0.753022
AGAP1	-0.200103	0.0248897	-0.0573627	0.691683
AGAP11	0.0911689	0.754703	0.220831	0.950884
AGAP2	-0.24587	0.126801	-0.0886721	0.74498
AGAP3	-0.10759	0.502518	0.0821042	0.881712
AGAP4	0.040189	0.855841	-0.022486	0.975289
AGAP5	0.238898	0.280798	0.25056	0.799318
AGAP6	0.0353259	0.870575	-0.0814534	0.978242
AGAP9	0.0172614	0.942851	-0.00366101	0.990057
AGBL1	0.0864288	0.706971	0.0340644	0.938275
AGBL3	-0.0689838	0.788224	-0.0410033	0.959779
AGBL4	0.275765	0.198346	-0.0049285	0.776436
AGBL5	-0.210281	0.200023	-0.0976561	0.776436
AGFG1	0.146018	0.14143	-0.00528154	0.749703
AGFG2	-0.531048	0.00206775	-0.174622	0.616144
AGGF1	0.123413	0.304608	-0.017844	0.81201
AGK	0.118287	0.642646	-0.161722	0.923751
AGL	0.168513	0.173047	-0.00166727	0.75982
AGMAT	-0.153315	0.432366	-0.204527	0.855147
AGO1	-0.0657537	0.425345	0.0811407	0.853697
AGO2	-0.0832603	0.223214	0.0850143	0.790722
AGO3	0.10654	0.199519	0.0807375	0.776436
AGO4	0.0515615	0.687845	-0.0451919	0.931574
AGPAT2	0.0820033	0.748463	-0.0447558	0.948839
AGPAT3	0.0330845	0.749656	0.124116	0.949358
AGPAT4	0.0391221	0.738069	0.062155	0.944969
AGPAT4-IT1	0.457845	0.0564936	0.612607	0.713648
AGPAT5	-0.0595856	0.691008	0.0307291	0.932813
AGPS	0.302651	0.0130082	0.1113	0.65523
AGRN	-0.292467	0.390617	0.150345	0.842083
AGT	0.150098	0.440499	0.29122	0.859963
AGTPBP1	-0.109386	0.190752	0.0799751	0.776436
AGTRAP	-0.0836799	0.743754	-0.0141478	0.947269
AHCTF1	-0.0648421	0.560098	-0.167797	0.899506
AHCTF1P1	0.0436805	0.752532	-0.130802	0.949601
AHCY	-0.00985684	0.950546	0.0277835	0.991454
AHCYL1	0.0791126	0.488403	0.104331	0.875031
AHCYL2	-0.0096377	0.884747	0.0109688	0.982299
AHDC1	-0.109879	0.64174	0.126378	0.923751
AHI1	-0.0112979	0.929151	-0.0739669	0.988132
AHNAK	-0.127849	0.286839	-0.0217287	0.802015
AHNAK2	-0.0580665	0.686077	-0.0435067	0.931574
AHR	0.122417	0.474772	0.0105809	0.872058
AHRR	0.493656	0.0404813	0.320029	0.693548
AHSA1	0.110955	0.521626	-0.111715	0.888838
AHSA2	0.0240276	0.854127	0.101915	0.975008
AIDA	-0.206701	0.351184	-0.365994	0.82514
AIF1L	-0.177075	0.156986	0.409207	0.753022
AIFM1	0.274873	0.193298	0.185814	0.776436
AIFM2	-0.22176	0.269369	-0.0869175	0.797117
AIFM3	-0.0977565	0.718242	0.233733	0.941594
AIG1	0.175436	0.153053	0.0930876	0.753022
AIM1	0.186967	0.448204	-0.0969401	0.86506
AIMP1	0.00512554	0.980348	-0.101998	0.996438
AIMP2	0.0178015	0.942243	0.112322	0.990057
AIP	0.0402975	0.851152	0.172056	0.974882
AJAP1	-0.085267	0.264456	-0.181811	0.797117
AJUBA	-0.198095	0.394352	0.0316907	0.843577
AK1	-0.226668	0.30643	-0.0448545	0.813479
AK2	0.158414	0.288527	0.153797	0.802997
AK3	0.0943076	0.453796	0.0683559	0.866373
AK4	-0.179173	0.183506	-0.100287	0.772982
AK5	0.071364	0.501039	-0.201523	0.881495
AK8	0.243054	0.373498	-0.121974	0.836378
AK9	0.308153	0.0269777	0.206472	0.691683
AKAP1	-0.0075216	0.94434	0.0122677	0.990636
AKAP10	0.172121	0.0974626	0.0969499	0.726657
AKAP11	0.152562	0.0891654	-0.0427742	0.724997
AKAP12	0.0131932	0.839399	-0.112042	0.973548
AKAP13	-0.0679236	0.389723	0.0381681	0.84164
AKAP3	-0.277398	0.173307	-0.120402	0.75991
AKAP5	0.22809	0.19047	-0.137747	0.776436
AKAP6	0.162194	0.0415726	-0.0106412	0.693548
AKAP7	0.10638	0.440631	0.0991614	0.859966
AKAP8	-0.108177	0.457649	-0.110563	0.867797
AKAP8L	-0.0693488	0.563864	0.0329107	0.90088
AKAP9	-0.0785463	0.270716	-0.0785879	0.797117
AKIP1	0.330465	0.156126	0.23683	0.753022
AKIRIN1	-0.111507	0.297148	-0.0210694	0.80767
AKIRIN2	-0.113937	0.574322	-0.180175	0.902086
AKNA	-0.450261	0.00917848	0.0120224	0.65523
AKR1A1	0.159458	0.353726	0.116875	0.82514
AKR1B1	-0.00287719	0.984335	-0.1104	0.997016
AKR1C1	0.544822	0.0257357	0.441003	0.691683
AKR1C2	0.347006	0.216941	0.215731	0.784494
AKR1C3	0.30586	0.234844	0.277869	0.792332
AKR1E2	0.063714	0.77195	-0.0720538	0.956122
AKR7A2	-0.0763201	0.618912	0.0264986	0.91616
AKR7A2P1	-0.201011	0.334507	-0.0405205	0.823159
AKR7A3	0.0379049	0.88319	-0.0345682	0.981775
AKR7L	0.129131	0.559225	0.107705	0.899096
AKT1	-0.11797	0.541476	0.192056	0.894256
AKT1S1	-0.0722217	0.759933	-0.0340302	0.952194
AKT2	-0.237612	0.184121	0.0188904	0.772982
AKT3	-0.15298	0.47901	-0.185723	0.872311
AKTIP	-0.129115	0.359444	-0.112747	0.827122
ALAD	-0.185365	0.117837	0.00337555	0.741036
ALAS1	0.218892	0.0785788	0.133141	0.724336
ALCAM	0.0828322	0.470203	0.0807161	0.870978
ALDH16A1	-0.261961	0.331376	-0.128404	0.823159
ALDH18A1	-0.144129	0.284497	-0.131392	0.801403
ALDH1A1	-0.0613984	0.747234	0.140206	0.948475
ALDH1A3	-0.140384	0.453467	-0.237953	0.866373
ALDH1B1	0.409635	0.0494035	0.0909723	0.70819
ALDH1L1	-0.136435	0.468974	0.0704277	0.8705
ALDH1L1-AS2	0.172155	0.393207	0.231559	0.843577
ALDH1L2	0.290522	0.141794	0.0901471	0.750586
ALDH2	0.0367872	0.702355	0.138564	0.936211
ALDH3A2	0.0652595	0.534906	-0.0992892	0.893344
ALDH3B1	-0.461839	0.0724096	-0.29693	0.724336
ALDH4A1	-0.259153	0.307253	0.226132	0.81391
ALDH5A1	-0.167695	0.0878387	-0.224718	0.724997
ALDH6A1	-0.0943097	0.332171	-0.0172414	0.823159
ALDH7A1	0.142732	0.232624	0.152772	0.792269
ALDH8A1	-0.438978	0.0595584	-0.525489	0.723797
ALDH9A1	0.219744	0.164002	0.10972	0.755046
ALDOA	-0.0544823	0.711724	-0.0449794	0.940303
ALDOB	0.288073	0.315517	0.0152948	0.815583
ALDOC	0.110117	0.296626	0.059786	0.80767
ALG1	-0.395749	0.0987555	-0.204744	0.727282
ALG10	0.252092	0.243755	0.00129094	0.792332
ALG10B	0.104529	0.547066	0.0575266	0.894256
ALG11	0.342899	0.246557	0.115521	0.792979
ALG12	-0.193929	0.35334	-0.0392506	0.82514
ALG13	0.156308	0.320942	0.0204231	0.818
ALG14	0.219913	0.28131	0.223805	0.799596
ALG1L9P	0.0224037	0.933529	-0.0992433	0.988746
ALG2	0.345645	0.0854894	0.162135	0.724336
ALG3	-0.0766972	0.792102	-0.109938	0.96031
ALG5	0.714715	0.000519504	0.604387	0.616144
ALG6	-0.0307519	0.883502	-0.148685	0.981775
ALG8	0.267067	0.14953	0.22191	0.752105
ALG9	0.32215	0.0255365	0.120761	0.691683
ALK	0.107639	0.604858	0.295392	0.910689
ALKBH1	0.199387	0.336868	0.0486747	0.823159
ALKBH2	-0.17599	0.354159	-0.190596	0.825212
ALKBH3	0.495305	0.028803	0.123777	0.692457
ALKBH3-AS1	0.377678	0.129062	0.220848	0.7461
ALKBH4	-0.323231	0.243502	-0.103079	0.792332
ALKBH5	0.0393002	0.715903	0.0226787	0.940917
ALKBH6	0.0971183	0.661283	-0.0333744	0.928023
ALKBH7	0.155389	0.610279	0.213087	0.912541
ALKBH8	-0.0514676	0.814748	-0.105259	0.966612
ALMS1	-0.147253	0.0689221	-0.0401736	0.724336
ALMS1P1	0.341183	0.225285	0.188116	0.791435
ALOX12	-0.153013	0.461146	-0.0357425	0.869026
ALOX12-AS1	0.24765	0.318876	0.233117	0.816323
ALOX12P2	-0.0036291	0.984728	0.0794733	0.997016
ALOX15B	-0.577972	0.0396145	-0.425817	0.693548
ALOX5AP	-0.212554	0.333881	-0.193522	0.823159
ALPK1	0.256262	0.211394	0.379708	0.781513
ALPK3	-0.00641281	0.976395	0.154201	0.995662
ALPL	-0.261856	0.234501	0.0468374	0.792269
ALS2	0.0294331	0.748103	-0.0994893	0.948817
ALS2CL	-0.103585	0.633497	-0.13185	0.921941
ALS2CR11	0.0110471	0.965267	0.0589943	0.994764
ALS2CR12	0.304086	0.226735	0.132128	0.791435
ALX3	-0.302675	0.131819	0.0558298	0.7461
ALX4	0.0851616	0.722921	0.121786	0.941594
ALYREF	-0.210413	0.259009	-0.0526456	0.795934
AMBRA1	0.106105	0.362111	0.080144	0.829183
AMD1	0.187452	0.0661684	-0.051149	0.724336
AMDHD2	0.127527	0.640277	0.160156	0.923751
AMER1	0.194764	0.227189	0.0631881	0.791435
AMER2	-0.0695298	0.365932	0.132494	0.830862
AMER3	-0.0689654	0.64439	-0.248283	0.924188
AMFR	-0.124802	0.163705	-0.0356017	0.755046
AMIGO1	-0.0134047	0.903379	-0.16658	0.98536
AMIGO2	-0.120148	0.616236	-0.241469	0.91519
AMIGO3	0.108435	0.620029	0.2466	0.917016
AMMECR1	0.492757	0.0502408	0.295583	0.70819
AMMECR1L	-0.111683	0.377643	-0.0741428	0.838047
AMN1	0.150256	0.351997	-0.0204512	0.82514
AMOT	-0.0630715	0.461117	0.126366	0.869026
AMOTL1	-0.152624	0.0838384	0.0303343	0.724336
AMOTL2	-0.0560977	0.678122	0.224472	0.929835
AMPD2	-0.090294	0.565759	-0.0566388	0.90088
AMPD3	-0.181894	0.273689	0.0445506	0.797117
AMPH	0.122234	0.233238	-0.241232	0.792269
AMT	-0.0223298	0.92153	-0.0586584	0.987623
AMY2B	-0.237887	0.108727	-0.161043	0.73497
AMZ1	0.252108	0.189871	0.639521	0.776436
AMZ2	0.103138	0.448092	0.0525565	0.86506
AMZ2P1	0.367681	0.0688628	0.0639025	0.724336
ANAPC1	0.38612	0.00359714	0.087383	0.616144
ANAPC10	0.27077	0.185067	0.0770439	0.772982
ANAPC11	-0.247312	0.404623	0.00967123	0.846087
ANAPC13	0.171387	0.378039	-0.190562	0.838047
ANAPC15	-0.0298083	0.902223	0.225446	0.98536
ANAPC16	-0.283597	0.0510899	-0.296197	0.70819
ANAPC2	-0.125933	0.574444	0.0931734	0.902086
ANAPC4	0.161141	0.314053	0.0278328	0.815583
ANAPC5	0.00766891	0.926843	-0.00404136	0.988132
ANAPC7	0.128441	0.335595	-0.0140062	0.823159
ANGEL1	-0.151452	0.159744	-0.107935	0.753301
ANGEL2	0.0307377	0.809559	-0.0133126	0.965345
ANGPT1	0.445005	0.0764369	0.306766	0.724336
ANGPT2	0.0408166	0.869959	0.0511596	0.978122
ANGPTL1	0.105562	0.656999	-0.160787	0.928023
ANGPTL2	0.0502436	0.788762	0.111449	0.959841
ANGPTL3	-0.0686439	0.767323	-0.115058	0.955034
ANGPTL4	-0.115813	0.687527	0.177889	0.931574
ANGPTL7	-0.534162	0.014418	-0.275489	0.65523
ANK1	-0.0716567	0.661236	-0.00923038	0.928023
ANK2	0.174607	0.0151555	-0.095521	0.65523
ANK3	0.0547502	0.455677	-0.0325436	0.866735
ANKAR	-0.117368	0.469606	0.0158987	0.870594
ANKDD1A	0.157616	0.385358	0.135807	0.839234
ANKDD1B	-0.228904	0.266234	-0.323028	0.797117
ANKEF1	0.474485	0.066422	0.181283	0.724336
ANKFN1	0.150118	0.553938	0.15413	0.897443
ANKFY1	-0.0573354	0.397695	0.0364862	0.844137
ANKH	-0.0901592	0.189946	-0.0698553	0.776436
ANKHD1	0.273597	0.296773	-0.0428619	0.80767
ANKIB1	-0.0582903	0.375679	0.0852129	0.83766
ANKK1	0.262463	0.247815	0.324341	0.79311
ANKLE1	0.385475	0.0827975	0.319153	0.724336
ANKLE2	0.12449	0.214065	0.116671	0.784494
ANKMY1	0.109671	0.6149	0.180847	0.914657
ANKMY2	0.505463	0.00751735	0.197533	0.637325
ANKRA2	0.323674	0.165948	0.12211	0.755264
ANKRD10	-0.019246	0.847154	-0.091819	0.974761
ANKRD11	-0.196989	0.143642	-0.027232	0.751924
ANKRD12	-0.0249647	0.745614	-0.035075	0.947986
ANKRD13A	-0.00929592	0.949984	0.0856839	0.991454
ANKRD13B	-0.190218	0.313368	-0.0302328	0.815583
ANKRD13C	-0.0751491	0.499309	-0.165941	0.88117
ANKRD13D	-0.367713	0.199472	-0.0793869	0.776436
ANKRD16	-0.281954	0.145797	-0.186299	0.751924
ANKRD17	0.0371063	0.538046	-0.00461952	0.893449
ANKRD18A	-0.128369	0.587315	0.0946439	0.905277
ANKRD18B	0.0920197	0.634767	-0.0828394	0.922222
ANKRD19P	-0.0976361	0.524659	-0.142403	0.890009
ANKRD20A1	0.221103	0.324101	0.236831	0.818713
ANKRD20A4	-0.00391659	0.986119	0.0370272	0.99716
ANKRD20A5P	-0.105418	0.689336	-0.127069	0.932442
ANKRD23	-0.34386	0.109589	-0.0234031	0.73497
ANKRD24	-0.377064	0.0993568	-0.195937	0.727282
ANKRD26	0.0220489	0.825267	0.00754622	0.969497
ANKRD26P3	0.598532	0.029607	0.346588	0.693548
ANKRD27	0.0185587	0.817119	0.0462763	0.967181
ANKRD28	0.0853635	0.352512	0.0410472	0.82514
ANKRD29	-0.0126451	0.941589	-0.13351	0.990057
ANKRD30B	0.0122776	0.957593	-0.0545402	0.993111
ANKRD30BL	-0.303938	0.221174	-0.346224	0.788052
ANKRD31	-0.519629	0.0453216	-0.419638	0.705718
ANKRD33B	-0.140261	0.13283	-0.116304	0.7461
ANKRD34A	0.179571	0.402928	0.168031	0.845719
ANKRD34C	0.379817	0.0669438	-0.0947521	0.724336
ANKRD35	-0.165584	0.474342	-0.0088491	0.87187
ANKRD36	0.116932	0.253749	0.0611567	0.795142
ANKRD36B	-0.0457945	0.758561	-0.0670352	0.951786
ANKRD36BP1	-0.0663016	0.751962	-0.00484268	0.949601
ANKRD36BP2	0.082132	0.648909	-0.0385764	0.925314
ANKRD36C	-0.165628	0.0665521	-0.0555021	0.724336
ANKRD37	0.0578693	0.838598	0.104152	0.972933
ANKRD39	0.0965356	0.677273	0.0931097	0.929479
ANKRD40	-0.35742	0.000495153	0.107186	0.616144
ANKRD42	0.0272588	0.832144	-0.126194	0.971033
ANKRD44	0.0434405	0.714124	0.134045	0.940523
ANKRD44-IT1	-0.1257	0.60467	-0.115408	0.910689
ANKRD45	-0.111659	0.619193	-0.101045	0.916255
ANKRD46	0.228059	0.0999509	-0.0737297	0.727297
ANKRD49	0.457768	0.0422881	0.21184	0.693548
ANKRD50	0.262643	0.0385441	0.117876	0.693548
ANKRD52	-0.0995912	0.381304	-0.0153647	0.83817
ANKRD53	0.259337	0.276004	0.336408	0.797117
ANKRD54	-0.162614	0.342685	-0.0454368	0.823739
ANKRD55	-0.0401453	0.847122	-0.0609739	0.974761
ANKRD6	0.149764	0.303821	0.0740446	0.811584
ANKRD61	0.228748	0.349911	0.0929908	0.82514
ANKRD62	-0.170714	0.514719	-0.354107	0.887367
ANKRD62P1-PARP4P3	0.0820582	0.699515	0.111411	0.935791
ANKRD65	-0.0638102	0.831019	0.2602	0.971033
ANKRD7	0.307018	0.20416	0.216252	0.777127
ANKRD9	-0.265094	0.308199	0.173752	0.81391
ANKS1A	-0.203171	0.128278	-0.0335892	0.7461
ANKS1B	-0.0469401	0.478839	-0.131781	0.872311
ANKS3	-0.142934	0.473342	0.087173	0.871439
ANKS6	-0.168227	0.15453	-0.0778107	0.753022
ANKZF1	-0.0975086	0.465314	0.0337872	0.869439
ANLN	0.0218313	0.879062	0.362778	0.980591
ANO1	-0.275806	0.26309	-0.335518	0.797117
ANO10	-0.0299878	0.844287	0.0168806	0.974168
ANO2	-0.0654473	0.725154	0.252345	0.941594
ANO3	0.137041	0.429447	-0.359335	0.854433
ANO4	0.178256	0.150329	0.331914	0.752775
ANO5	0.185972	0.119636	-0.0521781	0.741036
ANO6	0.0426061	0.720224	0.150211	0.941594
ANO7	-0.241512	0.315473	-0.13423	0.815583
ANO8	-0.340212	0.0513412	0.0338167	0.70819
ANOS1	0.321014	0.0901061	0.0112324	0.724997
ANP32A	0.0789092	0.493945	0.228224	0.878849
ANP32A-IT1	-0.204114	0.349215	-0.0658354	0.82514
ANP32AP1	0.100278	0.682373	0.185949	0.930706
ANP32B	0.0327364	0.86593	0.573124	0.977408
ANP32C	-0.280593	0.148982	-0.22668	0.751935
ANP32E	0.0140891	0.936476	0.09961	0.989075
ANPEP	-0.411163	0.204812	-0.0503296	0.778351
ANTXR1	0.0185507	0.862538	0.123676	0.977186
ANTXR2	0.109401	0.639446	-0.088377	0.923484
ANXA1	0.157552	0.501732	0.0705065	0.881495
ANXA11	0.0207127	0.847617	-0.0207822	0.974761
ANXA2	0.0584559	0.804391	0.183374	0.963486
ANXA2P1	0.0995537	0.685121	0.131062	0.931362
ANXA2P2	0.525155	0.0379167	0.499541	0.693548
ANXA3	0.140611	0.540096	0.197086	0.894186
ANXA4	0.19442	0.287684	0.366634	0.802128
ANXA5	-0.0192714	0.865635	0.0356817	0.977408
ANXA6	0.112669	0.200366	-0.179421	0.776436
ANXA7	0.137664	0.284306	-0.0282831	0.801263
ANXA9	-0.39781	0.123423	-0.090848	0.743707
AOAH	0.13109	0.577617	0.108104	0.902845
AOC2	0.350351	0.169838	0.278951	0.756665
AOC3	-0.379118	0.0577885	-0.30041	0.716726
AOX1	0.110518	0.703216	0.218255	0.936211
AP1AR	0.019508	0.924575	-0.146644	0.987934
AP1B1	-0.179246	0.241985	-0.000626686	0.792332
AP1G1	0.209295	0.0155693	0.0534349	0.65523
AP1G2	-0.0790374	0.685412	-0.170188	0.931495
AP1M1	-0.124461	0.430102	-0.0281419	0.854745
AP1S1	-0.0897631	0.458133	-0.219816	0.868383
AP1S2	0.229428	0.202954	0.0148056	0.776436
AP1S3	-0.0525532	0.829195	0.0106961	0.97062
AP2A1	-0.164358	0.407964	-0.105959	0.847751
AP2A2	-0.27461	0.28736	-0.249654	0.802128
AP2B1	0.163473	0.00618895	0.0355914	0.616144
AP2M1	0.0701482	0.325765	-0.0890001	0.819539
AP2S1	0.362224	0.0341652	0.0798601	0.693548
AP3B1	-0.246672	0.0600473	-0.0168162	0.724336
AP3B2	0.0132073	0.906749	-0.0886241	0.985796
AP3D1	-0.106221	0.426713	0.0512751	0.853697
AP3M1	0.215534	0.111889	-0.00402303	0.736908
AP3M2	0.0394649	0.760436	-0.225273	0.952357
AP3S1	0.275326	0.138306	0.00196613	0.7461
AP4B1	0.314932	0.162013	0.0539725	0.754722
AP4E1	0.25882	0.126975	0.099024	0.74498
AP4M1	0.366147	0.154061	0.379473	0.753022
AP4S1	-0.0806378	0.530302	-0.086984	0.891836
AP5B1	-0.0645932	0.69654	0.0734115	0.934558
AP5M1	0.134599	0.255906	-0.0840533	0.795142
AP5S1	-0.157915	0.467949	-0.206053	0.870055
AP5Z1	-0.064403	0.813225	0.171357	0.966392
APAF1	0.176255	0.110725	0.120281	0.73497
APBA1	0.324234	0.176474	0.359421	0.763472
APBA2	0.309156	0.252245	0.134275	0.795142
APBA3	-0.213268	0.454455	-0.0775088	0.866373
APBB1	-0.128402	0.352416	-0.0404456	0.82514
APBB1IP	0.0911785	0.692252	0.00199009	0.933132
APBB2	0.0362661	0.590071	0.148849	0.905433
APBB3	-0.0142323	0.936096	-0.0389842	0.989075
APC	0.102413	0.142184	-0.00284666	0.750586
APC2	-0.302057	0.319615	0.148172	0.816844
APCDD1	-0.109796	0.448426	0.104236	0.86506
APEH	-0.0700026	0.629299	0.0485686	0.920006
APEX1	0.298966	0.0520015	0.177603	0.70819
APEX2	0.317696	0.220278	0.344714	0.786869
APH1A	0.259219	0.135922	0.339516	0.7461
APH1B	-0.112794	0.425348	-0.0913624	0.853697
API5	0.141099	0.209516	-0.134336	0.778911
APIP	-0.0118107	0.960496	-0.015227	0.99358
APLF	0.065074	0.730892	0.098183	0.942844
APLN	0.0195923	0.936482	0.314061	0.989075
APLNR	-0.152425	0.600271	0.337732	0.909432
APLP1	-0.164287	0.244122	0.0262934	0.792332
APLP2	0.112867	0.0361193	-0.0474063	0.693548
APMAP	0.184452	0.0771996	-0.0547986	0.724336
APOA1-AS	-0.0844883	0.674601	-0.0379399	0.929031
APOBEC4	0.31801	0.283221	-0.0572323	0.801263
APOC1	0.0196247	0.94255	0.128147	0.990057
APOD	-0.148109	0.245161	0.141001	0.792884
APOE	-0.113457	0.652242	0.15071	0.926606
APOL1	0.00533924	0.984593	0.0935387	0.997016
APOL2	0.0448527	0.6475	-0.0706166	0.924894
APOL3	0.415329	0.0488068	0.305951	0.70819
APOL6	0.201044	0.303288	0.302456	0.811318
APOLD1	-0.136193	0.420807	0.113515	0.852953
APOO	0.146567	0.525743	-0.143522	0.890137
APOOL	0.187841	0.162806	0.0571771	0.755046
APOPT1	0.156285	0.455317	0.0154135	0.866373
APP	0.0924543	0.24117	-0.106449	0.792332
APPBP2	0.0252372	0.838217	-0.106909	0.972855
APPL1	0.0564391	0.583945	0.088295	0.904261
APPL2	0.00655217	0.941857	0.0274834	0.990057
APRT	0.297831	0.250171	0.122941	0.794237
APTR	0.325182	0.140117	0.188398	0.747841
APTX	0.161685	0.361901	0.0263713	0.829118
AQP1	-0.0840775	0.706505	0.284743	0.937972
AQP11	-0.263923	0.229489	-0.265792	0.791435
AQP4	0.247178	0.106494	0.0726761	0.73497
AQP4-AS1	-0.111529	0.610037	-0.085225	0.912541
AQP9	-0.0549929	0.851834	-0.201565	0.975008
AQR	0.141834	0.275557	0.0426429	0.797117
AR	0.256472	0.239042	0.24879	0.792332
ARAF	-0.181254	0.28669	-0.130208	0.802015
ARAP1	-0.314726	0.133769	-0.00386041	0.7461
ARAP2	0.0367616	0.637759	0.16706	0.922775
ARAP3	-0.0931856	0.669069	0.000247118	0.929031
ARC	-0.21026	0.483957	0.0630818	0.87335
ARCN1	0.0692222	0.511148	0.0326052	0.886397
AREL1	9.88e-05	0.999328	-0.0365839	0.999589
ARF1	-0.119225	0.291621	-0.0714942	0.806518
ARF3	0.0405002	0.462808	-0.0328463	0.869439
ARF4	0.0810571	0.582702	-0.122043	0.903977
ARF5	0.23226	0.128984	0.111764	0.7461
ARF6	0.132177	0.394249	0.159613	0.843577
ARFGAP1	-0.277042	0.225003	0.0742281	0.791435
ARFGAP2	-0.0994719	0.31735	-0.0199073	0.816031
ARFGAP3	0.0844164	0.548315	0.137906	0.895047
ARFGEF1	-0.0383286	0.643139	-0.0935152	0.923751
ARFGEF2	0.110923	0.169977	-0.0140441	0.756665
ARFGEF3	-0.0342803	0.593352	-0.0734177	0.906256
ARFIP1	0.0659654	0.736865	0.00551679	0.944689
ARFIP2	0.0716626	0.642319	0.0545534	0.923751
ARFRP1	-0.600233	0.00354565	-0.139082	0.616144
ARG2	-0.0172922	0.908245	-0.0352981	0.985796
ARGFXP2	-0.00161349	0.993097	-0.0466336	0.998229
ARGLU1	-0.0340369	0.671149	0.00514516	0.929031
ARHGAP1	-0.384459	0.0102782	-0.0759416	0.65523
ARHGAP10	-0.353676	0.029424	-0.282048	0.693548
ARHGAP12	0.0120094	0.906277	-0.0793308	0.985796
ARHGAP15	-0.417943	0.0947597	-0.400114	0.72564
ARHGAP17	-0.0736714	0.561724	-0.00672725	0.900284
ARHGAP18	-0.146193	0.458194	-0.151237	0.868383
ARHGAP19	-0.270336	0.214095	-0.108062	0.784494
ARHGAP20	0.174309	0.282643	-0.0896965	0.800561
ARHGAP21	-0.108672	0.0905802	0.0280249	0.724997
ARHGAP22	-0.195882	0.368648	0.0661714	0.833424
ARHGAP23	-0.0460225	0.865126	0.343577	0.977306
ARHGAP24	0.0409737	0.75885	-0.198077	0.951803
ARHGAP25	0.0182367	0.942807	-0.0393399	0.990057
ARHGAP26	-0.00625357	0.898398	-0.133489	0.98536
ARHGAP26-AS1	-0.0409767	0.864581	0.115664	0.977306
ARHGAP26-IT1	-0.149371	0.538794	0.0611636	0.893858
ARHGAP28	-0.140652	0.489501	-0.327128	0.87554
ARHGAP29	0.141744	0.246372	0.281717	0.792979
ARHGAP30	0.100932	0.62116	0.238502	0.917451
ARHGAP31	-0.0584953	0.635241	0.234761	0.922222
ARHGAP32	0.114333	0.133423	-0.0210294	0.7461
ARHGAP33	-0.250843	0.27407	0.0384824	0.797117
ARHGAP35	-0.110236	0.12455	-0.0132228	0.743707
ARHGAP39	-0.420079	0.0837943	-0.253131	0.724336
ARHGAP4	0.0165169	0.943436	0.363997	0.990238
ARHGAP42	0.0336858	0.850771	0.0949093	0.974882
ARHGAP44	-0.0871774	0.406272	-0.22742	0.846688
ARHGAP45	-0.381947	0.198861	-0.301275	0.776436
ARHGAP5	-0.0255189	0.778352	0.00603616	0.957277
ARHGAP5-AS1	0.255251	0.306274	0.0726991	0.813479
ARHGAP6	0.19396	0.35216	0.176184	0.82514
ARHGAP9	-0.188957	0.421724	-0.0243259	0.853311
ARHGDIA	-0.317031	0.220081	0.0150603	0.786565
ARHGDIB	-0.0583904	0.833918	-0.144458	0.97148
ARHGDIG	-0.0228796	0.91965	0.118335	0.987409
ARHGEF1	-0.436921	0.0985762	-0.0454422	0.727282
ARHGEF10L	-0.272484	0.242046	0.0298642	0.792332
ARHGEF11	-0.166236	0.113553	-0.101808	0.739326
ARHGEF12	0.0188768	0.740526	-0.0504205	0.946007
ARHGEF15	-0.111976	0.610078	0.203448	0.912541
ARHGEF17	-0.23838	0.179058	-0.0488785	0.765827
ARHGEF18	-0.291593	0.0935451	-0.0221064	0.724997
ARHGEF2	-0.199132	0.0785953	-0.0183142	0.724336
ARHGEF25	-0.395708	0.00113565	-0.392405	0.616144
ARHGEF26	0.289205	0.215497	0.231745	0.784494
ARHGEF26-AS1	-0.253252	0.20619	-0.138742	0.778876
ARHGEF28	-0.11417	0.475995	-0.303417	0.872311
ARHGEF3	0.094438	0.509394	-0.251359	0.885559
ARHGEF33	-0.062912	0.769557	-0.0546594	0.955237
ARHGEF37	-0.255519	0.101822	0.181954	0.730209
ARHGEF4	-0.148256	0.372409	0.0646127	0.836065
ARHGEF40	-0.124071	0.52137	0.198718	0.888599
ARHGEF6	-0.118117	0.237394	-0.125934	0.792332
ARHGEF7	0.00628717	0.91656	-0.0814956	0.987246
ARHGEF9	0.136905	0.0737834	-0.107462	0.724336
ARID1A	0.07051	0.442773	0.149257	0.861644
ARID1B	-0.0408604	0.58696	0.0492977	0.905277
ARID2	0.0809436	0.472379	0.106546	0.871439
ARID3A	-0.684272	0.0190122	-0.370231	0.65523
ARID3B	-0.309451	0.186515	-0.00666145	0.772982
ARID4A	0.221629	0.0323474	0.114295	0.693548
ARID4B	0.085102	0.338775	0.086728	0.823159
ARID5A	-0.315752	0.195049	-0.0390383	0.776436
ARID5B	0.0247905	0.784257	-0.0220556	0.958653
ARIH1	0.0817279	0.39218	0.0216428	0.843357
ARIH2	-0.000456198	0.996157	-0.0221454	0.999348
ARL10	0.115365	0.396463	0.0517102	0.844137
ARL13A	0.0509258	0.783101	-0.0372641	0.958636
ARL13B	0.223522	0.290935	0.333885	0.805899
ARL14EP	0.217506	0.155789	-0.0240569	0.753022
ARL15	0.0692853	0.75124	-0.154207	0.949553
ARL16	-0.0656461	0.753676	0.0183357	0.950356
ARL2	-0.182735	0.453271	0.0131352	0.866373
ARL2BP	0.148764	0.263484	-0.0488313	0.797117
ARL3	-0.158342	0.237616	-0.192172	0.792332
ARL4A	0.362274	0.0936033	0.0322604	0.724997
ARL4C	0.124615	0.398263	-0.0609951	0.844137
ARL4D	-0.021767	0.918273	-0.00834013	0.987246
ARL5A	0.251321	0.048997	0.0378034	0.70819
ARL5B	0.334217	0.0420789	0.0511431	0.693548
ARL6	0.251639	0.145682	-0.108264	0.751924
ARL6IP1	0.211856	0.0439505	-0.087495	0.700896
ARL6IP4	-0.181668	0.375052	-0.0400157	0.837292
ARL6IP5	0.223659	0.101099	-0.0767491	0.729574
ARL6IP6	0.103908	0.648364	0.0864343	0.925314
ARL8A	0.0139835	0.922254	0.0845708	0.987623
ARL8B	0.198798	0.0586598	-0.0107264	0.720146
ARMC1	0.174954	0.208765	-0.0276815	0.778911
ARMC10	0.000285046	0.999014	-0.0176487	0.999444
ARMC2	0.143294	0.271488	0.0356073	0.797117
ARMC2-AS1	-0.321765	0.142986	-0.336651	0.751924
ARMC3	0.166891	0.542812	-0.067146	0.894256
ARMC5	-0.28483	0.241912	-0.0724706	0.792332
ARMC6	0.00473802	0.985342	0.177312	0.99716
ARMC7	-0.230531	0.253122	-0.139015	0.795142
ARMC8	0.0607433	0.519722	0.0252488	0.888282
ARMC9	-0.0344897	0.75067	-0.141513	0.949358
ARMCX1	0.298911	0.110942	0.116632	0.73497
ARMCX2	0.230311	0.0569751	0.0186512	0.713648
ARMCX3	0.131959	0.161764	0.0415896	0.754722
ARMCX4	0.109182	0.283548	-0.0237413	0.801263
ARMCX5	-0.069721	0.7715	-0.301006	0.956109
ARMCX5-GPRASP2	0.00791155	0.96677	-0.163522	0.995137
ARMCX6	-0.0544209	0.816617	-0.283867	0.967181
ARMT1	0.238467	0.289313	-0.075299	0.803528
ARNT	0.0650492	0.558544	0.0141028	0.898744
ARNT2	-0.154915	0.00831621	-0.110211	0.648781
ARNTL	-0.151626	0.244754	-0.198718	0.792525
ARNTL2	0.060012	0.671154	-0.104513	0.929031
ARP1	0.305072	0.0506014	0.0240184	0.70819
ARPC1A	0.0402151	0.675428	-0.0354077	0.929031
ARPC1B	-0.171765	0.542538	-0.0160094	0.894256
ARPC2	0.157248	0.129931	0.00906382	0.7461
ARPC3	0.185306	0.263339	-0.0280954	0.797117
ARPC4	-0.15578	0.335863	-0.116903	0.823159
ARPC5	0.198604	0.0835198	0.206256	0.724336
ARPC5L	0.316493	0.0897126	0.10749	0.724997
ARPIN	-0.271595	0.09352	-0.0928711	0.724997
ARPP19	-0.00333632	0.966789	0.0224439	0.995137
ARPP21	0.0892685	0.374701	-0.0853612	0.837117
ARR3	-0.0672362	0.730777	0.11296	0.942844
ARRB1	-0.15307	0.103049	-0.0247373	0.730209
ARRB2	-0.169468	0.167211	-0.00657593	0.755264
ARRDC1	-0.212046	0.381398	0.217172	0.83817
ARRDC1-AS1	-0.369525	0.0862037	-0.0534912	0.724336
ARRDC2	-0.0968659	0.622808	0.237068	0.918559
ARRDC3	0.0954119	0.559978	0.0200545	0.899506
ARRDC4	-0.1341	0.393673	0.20461	0.843577
ARSA	-0.100211	0.624136	0.208722	0.919105
ARSB	0.0303388	0.842946	0.114669	0.97402
ARSD	0.0390848	0.868974	0.0906875	0.977874
ARSE	-0.106124	0.659771	-0.178526	0.928023
ARSG	-0.104102	0.581035	-0.080326	0.9036
ARSI	-0.381609	0.0290648	-0.00604679	0.692591
ARSJ	-0.15261	0.498028	-0.0590081	0.88079
ARSK	0.342013	0.115894	-0.0489787	0.740238
ART3	-0.0147125	0.94121	-0.162984	0.990057
ARTN	0.0704122	0.725553	0.0835218	0.941721
ARV1	0.153962	0.495719	0.0127057	0.879891
ARVCF	-0.268426	0.281577	-0.0388198	0.799768
ARX	0.195601	0.347211	0.156073	0.825034
ASAH1	0.0615629	0.586449	-0.108402	0.905277
ASAH2B	0.243046	0.385146	0.17381	0.839152
ASAP1	-0.0293866	0.721204	-0.0324824	0.941594
ASAP1-IT1	0.265756	0.133992	0.0905004	0.7461
ASAP1-IT2	-0.249329	0.321338	-0.212404	0.81804
ASAP2	-0.00939097	0.915055	0.0598195	0.987212
ASAP3	-0.211812	0.175615	0.0769012	0.762804
ASB1	-0.208435	0.0418169	0.0242217	0.693548
ASB13	0.069072	0.75676	0.00258374	0.950884
ASB14	-0.047938	0.833034	0.0584897	0.971169
ASB16	-0.210098	0.46067	-0.121718	0.869026
ASB16-AS1	-0.417105	0.0752756	-0.154636	0.724336
ASB3	-0.238619	0.355314	-0.342916	0.825243
ASB4	-0.328286	0.269114	-0.21967	0.797117
ASB6	0.12861	0.449488	0.209945	0.865496
ASB7	0.0744634	0.731235	0.0175746	0.942844
ASB8	-0.0711776	0.597116	-0.20938	0.908014
ASB9P1	0.0516958	0.761745	-0.0614312	0.953408
ASCC1	0.0714681	0.659507	-0.00463782	0.928023
ASCC2	-0.177348	0.300462	0.114019	0.810064
ASCC3	0.0384025	0.709739	0.0452549	0.939817
ASCL1	0.437517	0.0674429	0.707681	0.724336
ASF1A	0.139318	0.50169	0.0121677	0.881495
ASGR1	0.230348	0.339847	0.190454	0.823159
ASH1L	0.011609	0.83746	-0.0422699	0.97254
ASH1L-AS1	0.244846	0.305673	0.245525	0.812974
ASH2L	-0.085919	0.585962	-0.195308	0.905277
ASIC1	-0.0887432	0.551468	0.116503	0.89642
ASIC2	0.100314	0.560422	-0.0230883	0.899794
ASIC3	-0.355222	0.147803	-0.210152	0.751924
ASIC4	-0.147696	0.506199	0.00602325	0.883947
ASL	0.0313409	0.896637	0.296924	0.984836
ASNA1	-0.258055	0.155924	-0.172078	0.753022
ASNS	0.226193	0.13439	-0.105294	0.7461
ASNSD1	0.256529	0.0776109	0.0190538	0.724336
ASPA	-0.0230021	0.903179	0.376546	0.98536
ASPDH	-0.00524436	0.985497	0.215346	0.99716
ASPH	0.121606	0.199786	0.0504335	0.776436
ASPHD1	-0.257528	0.372906	0.210402	0.83608
ASPHD2	-0.0828169	0.727354	-0.00774211	0.942337
ASPM	0.0121442	0.956093	-0.185452	0.992583
ASPN	-0.250464	0.207197	-0.24353	0.778911
ASPRV1	0.134287	0.531955	0.399043	0.892538
ASPSCR1	-0.150485	0.550284	0.0481858	0.89608
ASRGL1	-0.0105598	0.933279	0.153961	0.988746
ASS1	-0.284571	0.134236	-0.345447	0.7461
ASTE1	0.142413	0.496691	0.0101805	0.8801
ASTN1	0.0999453	0.100294	-0.019916	0.727969
ASTN2	-0.0985415	0.410713	-0.026708	0.848106
ASTN2-AS1	-0.0404952	0.839573	-0.0220157	0.973556
ASUN	0.217323	0.275098	0.0836523	0.797117
ASXL1	-0.0328263	0.639285	0.0403495	0.923484
ASXL2	-0.139097	0.107839	-0.0108985	0.73497
ASXL3	0.262147	0.0139576	0.0871356	0.65523
ATAD1	0.196374	0.192206	0.0131695	0.776436
ATAD2	0.374464	0.0190517	0.0105737	0.65523
ATAD2B	-0.167079	0.0814513	-0.0688996	0.724336
ATAD3A	0.0306915	0.908453	0.209856	0.985796
ATAD3B	0.114165	0.630214	0.199601	0.92012
ATAD3C	-0.64669	0.00430593	-0.256962	0.616144
ATAD5	0.0182281	0.924715	-0.0887004	0.987934
ATCAY	-0.118074	0.234496	-0.181195	0.792269
ATE1	0.0432609	0.616493	-0.0985452	0.91519
ATE1-AS1	0.0742015	0.767796	0.130232	0.955197
ATF1	-0.171413	0.409768	-0.148155	0.848106
ATF2	0.183461	0.0767753	-0.0351189	0.724336
ATF3	0.102627	0.736105	0.221434	0.944535
ATF4	-0.112867	0.418441	-0.0495616	0.851644
ATF5	-0.366776	0.137407	-0.258662	0.7461
ATF6	0.0742941	0.442335	-0.039795	0.861501
ATF7	-0.07023	0.528649	0.0428769	0.890913
ATF7IP	0.0318814	0.707816	0.103704	0.938365
ATF7IP2	-0.0856513	0.635206	-0.245592	0.922222
ATG10	0.163859	0.434462	0.09474	0.856548
ATG101	0.211911	0.271216	0.141199	0.797117
ATG12	-0.102905	0.400256	-0.156536	0.844723
ATG13	-0.137157	0.123473	-0.051672	0.743707
ATG14	-0.000287094	0.998318	-0.106328	0.999439
ATG16L1	0.107845	0.363414	0.0533466	0.829183
ATG16L2	-0.225703	0.234368	0.0210275	0.792269
ATG2A	-0.0905578	0.741326	0.242639	0.946319
ATG2B	0.139987	0.108099	6.03e-05	0.73497
ATG3	0.193369	0.422139	0.196462	0.853511
ATG4A	0.382121	0.126215	0.286515	0.74498
ATG4B	-0.035146	0.84917	0.133517	0.974882
ATG4C	0.112522	0.384216	0.201042	0.838717
ATG4D	-0.188095	0.481516	-0.0898884	0.872311
ATG5	0.0534763	0.750894	-0.184837	0.949358
ATG7	0.066065	0.50198	0.0829365	0.881495
ATG9A	-0.103532	0.388574	-0.00363885	0.840963
ATG9B	-0.0536308	0.815061	-0.19601	0.96673
ATIC	-0.00378413	0.978759	-0.0805438	0.9959
ATL1	0.375796	0.0362383	-0.10964	0.693548
ATL2	0.190161	0.203343	-0.0937702	0.776436
ATL3	0.102106	0.339618	0.126265	0.823159
ATM	0.0347164	0.719811	0.0431351	0.941594
ATMIN	0.0869933	0.283509	-0.0154383	0.801263
ATN1	-0.369313	0.0849316	0.035489	0.724336
ATOH8	-0.224559	0.228874	0.121789	0.791435
ATOX1	0.157596	0.378838	0.0893882	0.83817
ATP10A	-0.326489	0.128725	0.0452885	0.7461
ATP10B	-0.141194	0.365893	0.225246	0.830862
ATP10D	0.0467438	0.715061	0.122862	0.940523
ATP11A	-0.140257	0.12397	0.129187	0.743707
ATP11A-AS1	-0.0356936	0.881563	-0.0923425	0.981691
ATP11B	0.0907213	0.43789	-0.0826026	0.858644
ATP11C	-0.066598	0.728115	0.0599081	0.942607
ATP13A1	-0.313602	0.201865	-0.152165	0.776436
ATP13A2	0.0266496	0.908413	0.182909	0.985796
ATP13A3	0.179355	0.187765	0.0288928	0.773083
ATP13A4	0.0774541	0.571999	0.118424	0.901524
ATP13A5	-0.357643	0.152449	-0.353262	0.753022
ATP1A1	0.109291	0.264555	-0.228949	0.797117
ATP1A1-AS1	0.0719523	0.772418	0.184688	0.956191
ATP1A2	-0.0520383	0.636272	0.0472018	0.922408
ATP1A3	-0.00134314	0.992982	-0.161333	0.998229
ATP1A4	-0.0284103	0.928964	0.00581295	0.988132
ATP1B1	0.32178	0.0182027	-0.159307	0.65523
ATP1B2	0.0678658	0.602481	0.290174	0.910363
ATP1B3	0.18206	0.30635	0.00220304	0.813479
ATP2A1	-0.350553	0.242116	-0.0103443	0.792332
ATP2A2	0.068171	0.283821	-0.0445484	0.801263
ATP2B1	0.163126	0.163466	-0.201319	0.755046
ATP2B2	0.0158668	0.854479	-0.0990151	0.975008
ATP2B3	-0.071267	0.6195	-0.192093	0.916499
ATP2B4	0.126664	0.039052	0.0685944	0.693548
ATP2C1	0.206897	0.053873	0.025024	0.70958
ATP2C2	0.364208	0.144633	0.365473	0.751924
ATP5A1	0.132867	0.201068	-0.126247	0.776436
ATP5B	0.200384	0.0695774	-0.126994	0.724336
ATP5C1	0.189231	0.16418	-0.0147487	0.755046
ATP5D	-0.488388	0.143532	-0.202315	0.751924
ATP5EP2	0.075517	0.768839	-0.138282	0.955237
ATP5F1	0.282904	0.0396336	0.111363	0.693548
ATP5G1	-0.123964	0.508707	-0.334241	0.885204
ATP5G2	-0.0180787	0.874678	0.00123278	0.979707
ATP5G3	0.0847933	0.533351	-0.22948	0.893344
ATP5H	0.23183	0.133519	-0.104966	0.7461
ATP5I	0.0709647	0.572227	0.0964819	0.901552
ATP5J	0.144266	0.438007	-0.246048	0.858644
ATP5J2	0.158042	0.433651	-0.0122372	0.856282
ATP5L	0.133573	0.355349	-0.137865	0.825243
ATP5O	0.062639	0.642903	-0.187383	0.923751
ATP5S	0.0260657	0.869125	-0.0332368	0.977901
ATP5SL	0.234591	0.201079	0.133137	0.776436
ATP6	-0.383308	0.0318801	-0.0326918	0.693548
ATP6AP1	0.120208	0.329673	-0.0939661	0.822043
ATP6AP1L	0.131453	0.559102	0.26329	0.899096
ATP6AP2	0.147703	0.38061	-0.273746	0.83817
ATP6V0A1	0.0437556	0.358663	-0.097093	0.826882
ATP6V0A2	0.137189	0.295631	0.0606412	0.80767
ATP6V0B	0.135479	0.385504	0.00825365	0.839234
ATP6V0C	-0.122549	0.505819	-0.215418	0.883947
ATP6V0D1	0.0372381	0.762943	-0.0532227	0.953974
ATP6V0E1	0.0408082	0.83759	-0.042501	0.97254
ATP6V0E2	-0.191737	0.218946	0.102586	0.785951
ATP6V0E2-AS1	0.146646	0.532015	0.110248	0.892538
ATP6V1A	0.234769	0.0572608	-0.207483	0.714718
ATP6V1B2	0.248921	0.0459302	-0.134622	0.705939
ATP6V1C1	0.15241	0.154193	-0.207948	0.753022
ATP6V1C2	0.183961	0.348256	0.232191	0.82514
ATP6V1D	-0.0280016	0.867774	-0.283406	0.977634
ATP6V1E1	0.299868	0.0372054	-0.128146	0.693548
ATP6V1E2	0.106131	0.669225	0.195443	0.929031
ATP6V1F	0.0627352	0.628566	-0.146177	0.920006
ATP6V1G1	0.430595	0.00503284	0.158883	0.616144
ATP6V1H	0.0855429	0.55094	-0.260406	0.896365
ATP7A	0.0334128	0.850989	-0.0408607	0.974882
ATP7B	-0.0492193	0.725955	0.00794986	0.941792
ATP8	-0.286989	0.322769	0.143111	0.818689
ATP8A1	0.142438	0.177571	0.000815495	0.76432
ATP8A2	0.136176	0.155082	-0.152568	0.753022
ATP8B1	-0.0513272	0.807452	0.027245	0.964351
ATP8B2	0.0415058	0.685781	0.104825	0.931495
ATP8B4	0.121708	0.559967	-0.157225	0.899506
ATP9A	0.0828921	0.0832123	-0.0504182	0.724336
ATP9B	-0.145566	0.0737248	-0.109994	0.724336
ATPAF1	0.0455691	0.673734	-0.0419961	0.929031
ATPAF2	0.169439	0.222064	0.13581	0.788611
ATPIF1	0.260219	0.140378	0.0428749	0.748489
ATR	0.431288	0.000699803	0.189306	0.616144
ATRAID	-0.463954	0.0315605	-0.354509	0.693548
ATRIP	0.600025	0.0147326	0.254491	0.65523
ATRN	0.10685	0.172127	-0.058879	0.759536
ATRNL1	0.193789	0.0985843	-0.172896	0.727282
ATRX	0.036901	0.631501	0.00780618	0.920674
ATXN1	-0.139678	0.0146128	-0.129544	0.65523
ATXN10	0.146627	0.0974408	0.0053737	0.726657
ATXN1L	-0.230704	0.0222394	-0.0695176	0.679461
ATXN2	0.0396376	0.689274	0.0364586	0.93244
ATXN2L	-0.236766	0.0684129	-0.0707316	0.724336
ATXN3	-0.0387789	0.737148	-0.0625414	0.94478
ATXN7	-0.196332	0.0592507	-0.148928	0.722718
ATXN7L1	-0.0453624	0.723373	-0.0679481	0.941594
ATXN7L2	0.0484569	0.819337	-0.0418354	0.96783
ATXN7L3	-0.273542	0.0332015	-0.167812	0.693548
ATXN7L3B	0.069687	0.419023	-0.0979813	0.852106
AUH	0.158308	0.277403	-0.072068	0.797117
AUNIP	0.288984	0.22734	0.163532	0.791435
AUP1	-0.375377	0.0246034	-0.206599	0.691683
AURKA	0.00601864	0.976489	0.0274706	0.995662
AURKAIP1	-0.250921	0.278365	-0.199381	0.797117
AURKAPS1	-0.219725	0.423251	-0.309821	0.853573
AURKC	-0.0860256	0.678858	0.0229928	0.929835
AUTS2	-0.160582	0.178168	-0.0402289	0.76432
AVEN	-0.160766	0.338406	-0.28232	0.823159
AVIL	0.112047	0.550425	0.115915	0.896215
AVL9	0.0133709	0.90175	-0.15972	0.98536
AVPI1	-0.188569	0.403729	-0.162273	0.845975
AVPR1A	0.185806	0.414933	0.0485691	0.850666
AXIN1	0.00290516	0.989225	0.19866	0.997418
AXIN2	-0.191485	0.216794	-0.0606131	0.784494
AXL	-0.0369243	0.81274	0.265813	0.966324
AZGP1	-0.24432	0.320788	-0.240884	0.817742
AZI2	0.127959	0.354317	-0.0180894	0.825212
AZIN1	-0.00168122	0.98748	-0.110986	0.997293
AZIN1-AS1	-0.0123154	0.965733	0.0201646	0.994877
AZIN2	0.171691	0.240194	0.22038	0.792332
B2M	0.191795	0.459557	0.149682	0.868877
B3GALNT1	0.12001	0.529155	-0.213204	0.891165
B3GALNT2	0.0120094	0.953815	0.0444238	0.992424
B3GALT1	0.243855	0.177628	-0.0444063	0.76432
B3GALT2	0.265818	0.19776	0.0446259	0.776436
B3GALT5	0.00807804	0.97599	0.0371314	0.995662
B3GALT5-AS1	0.177527	0.413403	0.168313	0.849615
B3GALT6	-0.314366	0.177444	-0.202114	0.76432
B3GAT1	-0.212636	0.165591	0.0184095	0.755264
B3GAT3	-0.448729	0.0486221	-0.191226	0.70819
B3GLCT	0.165598	0.342475	0.0185003	0.823739
B3GNT2	-0.0319523	0.839891	-0.200707	0.973556
B3GNT4	0.105943	0.682648	-0.112821	0.930718
B3GNT5	0.00803868	0.967229	-0.183437	0.995137
B3GNT7	0.0704246	0.771628	0.216349	0.956109
B3GNT9	0.126607	0.617445	0.295125	0.915313
B4GALNT1	0.0187209	0.881951	-0.209185	0.981775
B4GALNT3	-0.108145	0.641451	-0.0288246	0.923751
B4GALNT4	-0.462357	0.0681752	-0.0951484	0.724336
B4GALT1	0.225854	0.159511	0.343394	0.753301
B4GALT2	0.0302459	0.873287	0.13917	0.979454
B4GALT3	-0.0721249	0.685616	-0.0839201	0.931495
B4GALT4	-0.0278676	0.906386	-0.156403	0.985796
B4GALT5	-0.0723895	0.416018	-0.100671	0.850773
B4GALT6	0.0311614	0.863149	-0.309485	0.977186
B4GALT7	0.00998111	0.967437	0.194426	0.995139
B4GAT1	0.209113	0.111809	-0.113031	0.736908
B9D1	-0.188859	0.353391	0.0199571	0.82514
B9D2	-0.230329	0.338703	-0.26306	0.823159
BAALC	-0.0149724	0.84566	0.0418882	0.974701
BAALC-AS1	0.254105	0.393843	0.353362	0.843577
BABAM1	0.149549	0.241479	0.148409	0.792332
BACE1	0.0467423	0.484398	0.108282	0.87335
BACE1-AS	-0.021759	0.907509	0.0750044	0.985796
BACE2	-0.0956401	0.684802	0.0372516	0.931362
BACH1	-0.0701575	0.435331	0.0169384	0.856929
BACH2	-0.0240192	0.875535	0.215106	0.979816
BAG1	-0.193714	0.146523	-0.0312116	0.751924
BAG2	0.189741	0.464662	0.0489868	0.869439
BAG3	-0.149495	0.583072	0.170209	0.904094
BAG4	0.0150562	0.904343	-0.240406	0.98536
BAG5	-0.0282614	0.822961	-0.175161	0.968526
BAHCC1	-0.45625	0.057984	-0.145915	0.716726
BAHD1	-0.164934	0.367515	-0.0187911	0.832935
BAIAP2	-0.0190069	0.911577	0.0161148	0.986465
BAIAP2-AS1	-0.0882159	0.602716	-0.0882724	0.910363
BAIAP2L1	-0.00705258	0.981297	0.177908	0.99656
BAIAP2L2	-0.236146	0.340107	-0.0169754	0.823159
BAIAP3	-0.312638	0.1856	-0.0787286	0.772982
BAK1	-0.359561	0.0946106	-0.167948	0.725535
BAMBI	0.0498776	0.836516	0.00047697	0.97254
BANF1	0.183331	0.433846	0.212423	0.856291
BANP	-4.26e-05	0.999854	0.138937	0.999945
BAP1	-0.215338	0.150179	-0.0328293	0.752775
BARD1	0.165357	0.41021	0.371201	0.848106
BASP1	0.0494999	0.608133	-0.219353	0.912538
BAX	-0.131845	0.576765	0.0910016	0.902845
BAZ1A	-0.0140665	0.931321	0.234968	0.988746
BAZ1B	0.0779604	0.226547	0.114324	0.791435
BAZ2A	-0.0886809	0.329217	0.0141299	0.822043
BAZ2B	-0.0888677	0.319214	0.100951	0.816578
BBIP1	0.245449	0.331034	0.130273	0.822916
BBOF1	0.21721	0.296921	0.0595011	0.80767
BBOX1	-0.231783	0.337939	-0.256609	0.823159
BBS1	-0.191697	0.228159	-0.0720877	0.791435
BBS10	0.044574	0.824443	-0.133408	0.969247
BBS12	0.0170128	0.940613	-0.196656	0.990057
BBS2	0.0749728	0.454978	-0.00460008	0.866373
BBS4	0.0365952	0.869914	-0.126602	0.978122
BBS5	-0.224508	0.256697	-0.230926	0.795288
BBS7	0.0693419	0.65555	-0.208338	0.928023
BBS9	0.000786112	0.994723	0.0871484	0.998593
BBX	-0.111701	0.186669	0.0227606	0.772982
BCAM	-0.167839	0.527654	0.326203	0.890853
BCAN	-0.288056	0.104726	0.010909	0.733514
BCAP29	0.151598	0.330441	-0.0754097	0.822052
BCAP31	-0.120447	0.264353	-0.15904	0.797117
BCAR1	-0.365233	0.13827	0.034074	0.7461
BCAR3	-0.190614	0.362221	-0.0594184	0.829183
BCAS1	-0.242101	0.127651	0.424989	0.74498
BCAS2	0.484245	0.0381566	-0.0114375	0.693548
BCAS3	-0.0167781	0.869661	-0.0678418	0.978122
BCAS4	-0.16066	0.452477	-0.127919	0.866373
BCAT1	-0.0285914	0.871637	-0.257635	0.97879
BCAT2	-0.117181	0.625996	0.283845	0.919356
BCCIP	0.192234	0.338212	0.153233	0.823159
BCDIN3D	0.486502	0.0503086	0.36908	0.70819
BCDIN3D-AS1	-0.141955	0.58263	-0.125398	0.903957
BCHE	0.455169	0.0629166	0.182816	0.724336
BCKDHA	0.319899	0.231075	0.252628	0.792269
BCKDHB	0.0394934	0.781048	-0.091135	0.957805
BCKDK	-0.0239987	0.892617	0.0230004	0.984272
BCL10	0.0653421	0.730264	0.0229056	0.942844
BCL11A	-0.0148313	0.906204	-0.147802	0.985796
BCL11B	-0.0906092	0.605287	-0.167764	0.910689
BCL2	-0.153792	0.191585	0.032894	0.776436
BCL2L1	-0.29196	0.0380257	-0.0694466	0.693548
BCL2L11	-0.0589807	0.792554	-0.0278669	0.960343
BCL2L13	0.012417	0.865039	-0.0171997	0.977306
BCL2L15	-0.0391622	0.87285	-0.309052	0.979435
BCL2L2	-0.11274	0.168323	0.0269687	0.755473
BCL3	0.121967	0.601954	0.177474	0.910247
BCL6	-0.0289206	0.851991	0.178062	0.975008
BCL6B	-0.325433	0.129842	-0.1415	0.7461
BCL7A	-0.0910893	0.547055	-0.0828647	0.894256
BCL7B	-0.0803413	0.630896	-0.0252867	0.920404
BCL7C	-0.270797	0.214799	-0.0224209	0.784494
BCL9	0.0247472	0.85317	0.218289	0.975008
BCL9L	-0.432507	0.050944	-0.0274097	0.70819
BCLAF1	0.160278	0.143704	0.0113225	0.751924
BCO1	0.311671	0.253566	0.435985	0.795142
BCO2	0.282062	0.148939	-0.00436138	0.751935
BCOR	0.0711065	0.572998	0.164362	0.901895
BCORL1	-0.204696	0.284308	0.0444754	0.801263
BCR	-0.30168	0.063747	-0.0609561	0.724336
BCS1L	0.0344425	0.8653	0.00784228	0.977306
BCYRN1	-0.644857	0.0866829	-0.179241	0.724336
BDH2	0.118093	0.580794	0.19478	0.9036
BDNF	-0.201991	0.476203	-0.211166	0.872311
BDNF-AS	-0.0219482	0.92986	0.02654	0.988314
BEAN1	-0.426664	0.0462085	-0.143568	0.705939
BECN1	-0.135817	0.416574	-0.237019	0.850931
BEGAIN	-0.26941	0.218656	-0.149678	0.785759
BEND3	0.52823	0.00377276	0.582975	0.616144
BEND3P3	-0.0854919	0.586723	0.0111413	0.905277
BEND4	0.205493	0.469399	0.0465173	0.8705
BEND5	0.133415	0.546705	-0.114668	0.894256
BEND6	0.0369738	0.810516	-0.147309	0.965697
BEND7	-0.0190324	0.924169	0.0171345	0.987934
BEST1	0.204829	0.245666	0.447204	0.792956
BEST3	-0.555556	0.0391005	-0.0834801	0.693548
BET1	0.02682	0.912666	-0.0935689	0.986662
BET1L	-0.31356	0.0805243	-0.0341617	0.724336
BEX1	0.37139	0.0202079	-0.159092	0.666478
BEX2	0.165177	0.316672	-0.165612	0.815966
BEX3	-0.00326917	0.974646	-0.172115	0.995662
BEX4	0.242588	0.0440511	-0.0164256	0.700896
BEX5	0.468337	0.0344086	0.066803	0.693548
BGN	-0.0517379	0.840502	0.372369	0.973556
BHLHB9	0.124523	0.345506	-0.178373	0.824346
BHLHE22	0.116312	0.569195	-0.0766336	0.90088
BHLHE40	0.271442	0.0440441	0.250676	0.700896
BHLHE41	0.0324701	0.805412	-0.0262087	0.963927
BHMT2	-0.0259856	0.894899	0.0544753	0.984453
BICC1	0.397175	0.0801196	0.291579	0.724336
BICD1	0.065523	0.418069	-0.0262041	0.851121
BICD2	-0.260398	0.017894	-0.109575	0.65523
BICDL1	-0.066676	0.669093	-0.057145	0.929031
BID	0.00495022	0.966905	-0.103347	0.995137
BIN1	-0.334869	0.0658041	0.0478055	0.724336
BIN2	0.0614723	0.810969	0.148432	0.965834
BIN3	-0.312111	0.0885487	-0.190887	0.724997
BIN3-IT1	0.178811	0.470398	0.0486934	0.870978
BIRC2	0.0193867	0.890361	-0.010441	0.984253
BIRC3	-0.161469	0.51426	-0.00789451	0.887022
BIRC6	0.0817029	0.278272	0.0541125	0.797117
BIRC6-AS2	0.123172	0.63549	0.0267126	0.922372
BISPR	0.0523361	0.829721	-0.00375385	0.970862
BIVM	0.0221347	0.920363	-0.145715	0.987409
BLACAT1	-0.0708441	0.71634	-0.29785	0.941258
BLCAP	-0.0611684	0.481382	-0.174659	0.872311
BLID	0.333177	0.0936004	0.306008	0.724997
BLM	-0.0688817	0.716666	-0.0296011	0.941398
BLMH	0.0899112	0.659474	-0.0521707	0.928023
BLNK	0.12573	0.658661	0.0265252	0.928023
BLOC1S1	-0.34967	0.0646237	-0.299474	0.724336
BLOC1S2	0.176211	0.343796	0.0220511	0.824154
BLOC1S3	-0.174353	0.43541	-0.0547789	0.856929
BLOC1S4	0.000652076	0.997759	0.0420988	0.999439
BLOC1S6	0.0947588	0.441336	0.00778295	0.860796
BLVRA	0.0754658	0.674306	-0.0285524	0.929031
BLVRB	0.0385422	0.88832	0.0244718	0.98349
BLZF1	-0.0375693	0.80316	-0.108802	0.963065
BMF	0.10245	0.659337	0.181062	0.928023
BMP1	-0.478097	0.0813203	-0.17878	0.724336
BMP2	0.13845	0.513773	0.148552	0.886995
BMP2K	0.0876165	0.458241	0.0817948	0.868383
BMP3	0.264608	0.255208	-0.0633528	0.795142
BMP4	-0.3266	0.253561	-0.315004	0.795142
BMP6	0.401338	0.198486	0.402422	0.776436
BMP7	-0.14137	0.414779	0.048594	0.850666
BMP8A	-0.153124	0.337353	0.0177434	0.823159
BMP8B	0.438246	0.0264216	0.406047	0.691683
BMPER	-0.0114915	0.945944	-0.241088	0.990831
BMPR1A	-0.212219	0.287538	-0.137465	0.802128
BMPR1B	0.00741061	0.960007	0.0327605	0.99358
BMPR2	0.175054	0.0268418	-0.0310026	0.691683
BMS1	0.0590602	0.62094	-0.0166974	0.917391
BMS1P20	-0.0780681	0.699471	-0.0199365	0.935791
BMS1P21	-0.164199	0.47703	-0.28694	0.872311
BMS1P4	-0.516859	0.0145434	-0.275809	0.65523
BMS1P5	0.285113	0.222127	0.148054	0.788611
BMS1P6	-0.0642098	0.808237	-0.310895	0.964939
BMT2	0.250689	0.116113	-0.0300785	0.740238
BNC2	0.201315	0.473806	0.226411	0.871439
BNIP1	-0.130206	0.479904	-0.103871	0.872311
BNIP2	0.0788657	0.52854	0.168883	0.890853
BNIP3	0.148372	0.34117	-0.0747215	0.823336
BNIP3L	0.0585298	0.520894	-0.0669295	0.888282
BNIPL	-0.11408	0.65351	-0.0370398	0.927367
BOC	-0.248851	0.275013	0.0597854	0.797117
BOD1	0.00443767	0.977794	0.0799905	0.995679
BOD1L1	-0.0643666	0.399468	0.035012	0.844723
BOK	-0.314336	0.181453	0.290658	0.770155
BOLA1	-0.110035	0.620687	-0.0881493	0.91737
BOLA3	0.383313	0.0920058	0.125339	0.724997
BOLA3-AS1	0.108927	0.523968	0.0583467	0.889372
BOP1	-0.105902	0.723491	0.0867031	0.941594
BORA	0.47332	0.0373634	0.400264	0.693548
BORCS5	0.0871256	0.522087	0.108059	0.889017
BORCS6	0.246389	0.446281	0.320504	0.863907
BORCS7	0.0307903	0.886679	-0.0779266	0.983234
BORCS8	0.0130494	0.949611	0.00238575	0.991454
BPGM	0.0588687	0.788682	-0.0620889	0.959841
BPHL	0.00796983	0.971412	-0.109386	0.995662
BPNT1	-0.0101077	0.960246	-0.223882	0.99358
BPTF	-0.0990321	0.135457	0.0374165	0.7461
BRAF	0.122247	0.161711	-0.0646993	0.754722
BRAP	-0.219491	0.0945618	-0.245774	0.725535
BRAT1	-0.231883	0.433434	0.0627214	0.856156
BRCA1	0.151955	0.451551	0.401569	0.866373
BRCA2	0.2594	0.275316	0.3165	0.797117
BRCAT54	0.0607044	0.793977	-0.292883	0.960837
BRCC3	0.238004	0.231912	-0.00197762	0.792269
BRD1	-0.15684	0.326236	-0.036964	0.819649
BRD3	-0.0585869	0.712022	0.106428	0.940335
BRD4	-0.305937	0.064567	-0.0653275	0.724336
BRD7	-0.0860779	0.631242	-0.03451	0.920646
BRD7P3	-0.158339	0.418953	-0.0474109	0.852106
BRD8	-0.0813391	0.350726	-0.192813	0.82514
BRD9	0.102318	0.338909	0.179421	0.823159
BRE	0.0593387	0.692957	-0.0520165	0.933226
BRF1	-0.261658	0.0998263	-0.0354611	0.727297
BRF2	0.0644152	0.765174	-0.131172	0.954741
BRI3	-0.439284	0.0333592	-0.229531	0.693548
BRI3BP	-0.0959387	0.68021	-0.185736	0.930182
BRICD5	-0.218733	0.448191	0.0928572	0.86506
BRINP1	-0.0461289	0.629183	-0.0151806	0.920006
BRINP2	0.00534359	0.96033	-0.0087381	0.99358
BRINP3	-0.143589	0.340838	-0.181594	0.823294
BRIP1	0.000545477	0.998227	-0.0883741	0.999439
BRIX1	0.359279	0.0765575	0.128706	0.724336
BRK1	0.0343552	0.787614	-0.0714518	0.959264
BRMS1	-0.155396	0.48839	-0.0488483	0.875031
BRMS1L	0.0434752	0.857156	-0.263536	0.975345
BROX	0.0280875	0.808564	-0.0311576	0.965075
BRPF1	0.0899993	0.637493	0.313617	0.922718
BRPF3	-0.174241	0.212551	-0.0614961	0.782186
BRSK1	-0.254488	0.141397	-0.0567252	0.749703
BRSK2	-0.0691364	0.721039	0.14648	0.941594
BRWD1	0.0870888	0.303645	-0.00148325	0.811517
BRWD3	0.0602502	0.49958	0.0221862	0.88117
BSDC1	-0.132772	0.16694	-0.0333282	0.755264
BSG	-0.258535	0.297696	0.0382257	0.807858
BSN	-0.196663	0.284169	-0.0747711	0.801263
BSPRY	0.178671	0.403125	0.190999	0.845782
BST2	-0.0308428	0.907406	0.0657648	0.985796
BTAF1	0.0468121	0.610397	0.0243183	0.912541
BTBD1	-0.0163142	0.906688	-0.0512146	0.985796
BTBD10	0.252832	0.0166837	0.0741225	0.65523
BTBD11	-0.0641168	0.757802	-0.26736	0.9515
BTBD18	-0.0623083	0.73844	-0.25001	0.945074
BTBD19	-0.473857	0.0451411	-0.13231	0.705718
BTBD2	-0.443572	0.143717	0.0261793	0.751924
BTBD3	0.114778	0.270017	-0.0266136	0.797117
BTBD6	-0.307903	0.0427117	-0.189208	0.694854
BTBD8	0.129409	0.576591	0.0733301	0.902845
BTBD9	-0.123529	0.0673742	-0.189393	0.724336
BTC	0.132135	0.536839	-0.197285	0.893344
BTD	0.409116	0.0362205	0.119805	0.693548
BTF3	0.0643092	0.641365	-0.000515975	0.923751
BTF3L4	0.0029682	0.985459	-0.13792	0.99716
BTG1	0.00549646	0.975017	-0.0842808	0.995662
BTG2	-0.133722	0.470735	0.0947407	0.870978
BTG3	-0.172873	0.482551	-0.348971	0.872913
BTK	0.100339	0.627759	0.0344089	0.920006
BTN2A1	0.275351	0.125623	0.223083	0.74498
BTN2A2	0.112818	0.642833	0.0568191	0.923751
BTN2A3P	0.392509	0.201297	0.30189	0.776436
BTN3A1	0.442969	0.0295225	0.482962	0.693548
BTN3A2	0.235655	0.280238	0.397347	0.798911
BTN3A3	0.0239902	0.916544	-0.0382183	0.987246
BTNL9	-0.0328764	0.886319	0.0375	0.983199
BTRC	0.232519	0.00426085	0.0412888	0.616144
BUB3	0.0196283	0.896696	-0.0124103	0.984836
BUD13	0.0842054	0.729307	0.0437701	0.942844
BUD31	0.496047	0.0344799	0.319539	0.693548
BVES	-0.0532017	0.816115	0.120566	0.967181
BYSL	-0.518546	0.0227889	-0.427263	0.682183
BZW1	0.0843112	0.582988	-0.0183497	0.904094
BZW2	-0.158432	0.507183	-0.39392	0.884335
C10orf10	-0.155932	0.496157	0.213127	0.879891
C10orf105	0.0391664	0.895294	0.45396	0.984493
C10orf107	-0.293522	0.30585	-0.178936	0.813022
C10orf11	0.328871	0.16789	0.455633	0.755473
C10orf113	-0.0769349	0.751831	-0.0656514	0.949601
C10orf12	0.019964	0.877497	-0.0198713	0.979929
C10orf128	0.150754	0.493887	0.195735	0.878849
C10orf2	-0.551088	0.00830637	-0.301887	0.648781
C10orf25	-0.071883	0.748215	-0.112739	0.948839
C10orf35	0.371025	0.0823567	0.0721478	0.724336
C10orf54	-0.0993484	0.65527	0.191731	0.928023
C10orf67	0.248908	0.387158	0.147231	0.840375
C10orf76	-0.196386	0.0397403	-0.139014	0.693548
C10orf88	0.124345	0.545874	-0.0543478	0.894256
C10orf90	-0.0591999	0.60756	0.347581	0.912381
C11orf1	0.135774	0.576574	0.123155	0.902845
C11orf24	-0.385914	0.0557693	-0.212736	0.713648
C11orf31	-0.176076	0.354833	-0.179775	0.825243
C11orf42	0.107223	0.628037	0.110612	0.920006
C11orf45	-0.0236186	0.915353	-0.0150678	0.987212
C11orf49	-0.0826814	0.493129	0.0185187	0.878417
C11orf54	0.113279	0.528517	0.102909	0.890853
C11orf57	0.189119	0.266714	0.100216	0.797117
C11orf58	0.13027	0.250074	0.0387122	0.794237
C11orf63	-0.149753	0.505441	-0.415102	0.883947
C11orf65	0.0808669	0.727116	-0.00348248	0.942337
C11orf68	-0.0983292	0.65898	-0.0271185	0.928023
C11orf71	-0.0271932	0.899416	0.0321317	0.98536
C11orf74	-0.0768256	0.694318	-0.217362	0.933941
C11orf80	0.0477099	0.778512	-0.063363	0.957277
C11orf84	-0.0976297	0.67536	-0.0667486	0.929031
C11orf87	0.161817	0.195983	-0.173687	0.776436
C11orf95	0.0586833	0.683717	-0.0118792	0.930995
C11orf96	0.469137	0.0797068	0.656768	0.724336
C12orf10	0.103756	0.592426	0.0502636	0.905974
C12orf29	0.0190454	0.919025	-0.265639	0.987246
C12orf4	0.0189364	0.927807	-0.296547	0.988132
C12orf42	0.390041	0.0387063	0.318786	0.693548
C12orf43	-0.225934	0.217626	-0.272784	0.785069
C12orf45	0.369553	0.177688	0.200346	0.76432
C12orf49	0.104364	0.350134	0.166161	0.82514
C12orf54	-0.256246	0.155928	-0.219779	0.753022
C12orf57	0.0421594	0.876911	0.125868	0.979836
C12orf60	-0.161436	0.385964	-0.186379	0.839666
C12orf65	0.101435	0.487613	0.252357	0.874657
C12orf66	0.273578	0.202214	0.0694265	0.776436
C12orf73	-0.000768818	0.997911	-0.0532099	0.999439
C12orf75	0.195726	0.409876	0.0987467	0.848106
C12orf76	0.0952505	0.48568	0.101512	0.873622
C14orf1	0.243228	0.274289	0.0455268	0.797117
C14orf119	-0.0889752	0.705108	-0.263493	0.936985
C14orf132	-0.119462	0.164368	-0.114405	0.755046
C14orf159	0.160403	0.14184	0.1877	0.750586
C14orf166	-0.00808436	0.972047	-0.197096	0.995662
C14orf169	0.292439	0.137914	0.130259	0.7461
C14orf2	0.0566752	0.773383	-0.177663	0.956393
C14orf28	0.0950705	0.685139	-0.170363	0.931362
C14orf37	0.18679	0.292289	0.109694	0.806518
C14orf79	-0.290119	0.119045	-0.189382	0.741036
C14orf80	-0.163747	0.589371	-0.0767436	0.905433
C14orf93	0.139036	0.506114	0.119597	0.883947
C15orf39	0.239595	0.323915	0.385285	0.818713
C15orf40	0.0753964	0.684966	0.157245	0.931362
C15orf41	-0.318864	0.158608	-0.265147	0.753093
C15orf52	-0.232759	0.325191	0.198057	0.819036
C15orf57	0.0532574	0.756393	0.093906	0.950884
C15orf59	-0.20469	0.250184	-0.0250942	0.794237
C15orf61	0.0408475	0.890877	-0.122626	0.984253
C15orf62	0.0781998	0.706126	0.263691	0.937794
C16orf46	-0.254314	0.253719	-0.253852	0.795142
C16orf52	0.0956019	0.532864	-0.114454	0.893029
C16orf58	-0.202307	0.351767	0.00828555	0.82514
C16orf62	-0.010791	0.894586	0.0553043	0.984408
C16orf70	0.110272	0.403557	0.00575045	0.845975
C16orf71	0.00677628	0.980398	0.0650554	0.996438
C16orf72	0.0836019	0.283814	-0.0160132	0.801263
C16orf87	0.320992	0.242482	0.118927	0.792332
C16orf89	-0.0817256	0.722814	-0.0136725	0.941594
C16orf91	0.0497185	0.787499	0.0378527	0.959264
C17orf102	0.224201	0.381033	0.0978098	0.83817
C17orf107	-0.0834484	0.75523	-0.135482	0.950884
C17orf51	-0.0645899	0.545489	-0.125835	0.894256
C17orf53	0.176375	0.460306	0.309342	0.869026
C17orf58	0.0814048	0.69311	-0.169766	0.933268
C17orf62	-0.115168	0.535584	0.257827	0.893344
C17orf67	0.106922	0.643679	0.134873	0.923751
C17orf75	-0.0466095	0.762691	-0.177025	0.953815
C17orf80	0.254092	0.0326961	0.129223	0.693548
C17orf97	0.145356	0.546232	0.103383	0.894256
C18orf21	-0.0923252	0.663562	-0.141301	0.928509
C18orf25	0.0568212	0.59624	-0.100313	0.907818
C18orf54	0.328385	0.149556	0.385306	0.752105
C18orf8	0.158263	0.229259	0.190445	0.791435
C19orf12	-0.13796	0.193847	-0.100361	0.776436
C19orf24	-0.767572	0.00911032	-0.651242	0.65523
C19orf25	-0.0248843	0.927843	0.23708	0.988132
C19orf43	0.181834	0.327729	0.236768	0.82045
C19orf44	-0.0275668	0.92068	0.183225	0.987493
C19orf47	0.0754048	0.720755	0.169046	0.941594
C19orf48	-0.127788	0.487827	-0.110268	0.874657
C19orf52	0.281566	0.228491	0.166366	0.791435
C19orf53	0.0728066	0.690723	0.132506	0.932808
C19orf54	-0.0894478	0.700086	-0.0176351	0.93601
C19orf57	0.0279603	0.920059	0.164027	0.987409
C19orf60	-0.771019	0.00301908	-0.606226	0.616144
C19orf66	0.0508828	0.793449	0.0730375	0.960721
C19orf68	-0.179275	0.484895	0.0188557	0.87335
C19orf70	0.0563525	0.831211	0.155804	0.971033
C19orf71	-0.013929	0.967253	0.418377	0.995137
C1D	0.0134686	0.941531	-0.22955	0.990057
C1GALT1	0.116812	0.432649	-0.0158121	0.855377
C1GALT1C1	0.312435	0.184885	0.0360689	0.772982
C1orf101	-0.268835	0.173234	-0.311054	0.75991
C1orf109	0.0844387	0.673858	-0.143014	0.929031
C1orf111	0.0128722	0.961676	-0.155258	0.993968
C1orf112	-0.139909	0.471495	-0.208715	0.871135
C1orf115	0.157795	0.15552	-0.193452	0.753022
C1orf122	-0.274924	0.126819	-0.1432	0.74498
C1orf123	0.161189	0.34894	0.089905	0.82514
C1orf131	-0.0212929	0.938799	0.16245	0.990057
C1orf145	0.301612	0.17144	0.0679237	0.757427
C1orf159	-0.0344859	0.873782	0.113336	0.979622
C1orf162	0.0550223	0.795031	-0.0404584	0.961462
C1orf174	0.221929	0.277804	0.205093	0.797117
C1orf198	-0.108379	0.296044	0.284826	0.80767
C1orf204	0.121662	0.520228	0.0343743	0.888282
C1orf21	-0.0404328	0.5956	-0.121881	0.907259
C1orf216	0.105102	0.406607	-0.0489411	0.846688
C1orf220	0.231691	0.367879	0.233491	0.833034
C1orf226	0.150254	0.532167	0.206446	0.892538
C1orf228	0.10476	0.670786	0.0885118	0.929031
C1orf27	-0.107182	0.431217	-0.0813078	0.855054
C1orf35	0.0827646	0.74695	0.174764	0.94838
C1orf43	-0.0219955	0.845766	-0.0661982	0.974701
C1orf50	-0.0485104	0.819555	0.0848437	0.96783
C1orf52	0.430955	0.0167159	0.249762	0.65523
C1orf54	0.120416	0.586914	0.0593117	0.905277
C1orf56	0.0042262	0.986439	-0.0827975	0.99716
C1orf61	0.0396749	0.756683	0.231278	0.950884
C1orf64	0.43499	0.0924747	0.589284	0.724997
C1orf74	0.237031	0.272375	0.229623	0.797117
C1QA	-0.00960002	0.969018	0.138651	0.995646
C1QB	0.0259222	0.917454	0.235742	0.987246
C1QBP	0.232666	0.377964	0.00535117	0.838047
C1QC	-0.411219	0.133347	-0.105997	0.7461
C1QL1	-0.369041	0.164745	-0.113412	0.755046
C1QL2	-0.15169	0.546136	0.0373192	0.894256
C1QL3	0.474236	0.0331555	-0.156204	0.693548
C1QTNF1	0.11404	0.643577	0.365455	0.923751
C1QTNF2	-0.414818	0.0565106	-0.550338	0.713648
C1QTNF3	0.16825	0.396037	0.221985	0.844137
C1QTNF6	0.0261945	0.903306	0.140614	0.98536
C1QTNF7	0.327356	0.274591	0.26904	0.797117
C1R	0.329252	0.125538	0.279285	0.74498
C1RL	-0.248761	0.296383	-0.126286	0.80767
C1RL-AS1	-0.392996	0.0850961	-0.311886	0.724336
C1S	0.559188	0.0376637	0.407437	0.693548
C20orf194	0.0174567	0.810132	0.0479984	0.965583
C20orf196	0.220182	0.423829	0.285249	0.853697
C20orf203	-0.0371061	0.890617	-0.168695	0.984253
C20orf27	-0.121107	0.617025	0.226482	0.915298
C20orf96	-0.444572	0.0451727	-0.113755	0.705718
C21orf2	-0.410673	0.0523578	-0.114385	0.70819
C21orf58	-0.199089	0.444911	-0.00439947	0.862834
C21orf59	-0.239013	0.166121	-0.300797	0.755264
C21orf91	-0.0167042	0.923637	0.112762	0.987882
C22orf23	-0.463411	0.0376956	-0.0342788	0.693548
C22orf24	-0.061882	0.832551	-0.0987519	0.97112
C22orf29	-0.121452	0.325645	-0.0742685	0.819539
C22orf34	0.188998	0.575238	0.370444	0.902442
C22orf39	-0.122509	0.384138	-0.118179	0.838703
C22orf46	-0.193729	0.339389	0.154313	0.823159
C2CD2	-0.108205	0.260745	-0.0165244	0.79693
C2CD2L	-0.00923492	0.958047	0.108776	0.993111
C2CD3	-0.047328	0.579534	-0.0543735	0.9036
C2CD4C	-0.223798	0.375895	-0.125853	0.83766
C2CD4D	-0.292445	0.237911	-0.159506	0.792332
C2CD5	0.140082	0.197995	-0.035311	0.776436
C2orf15	-0.173141	0.526855	-0.0804211	0.890853
C2orf16	0.249256	0.321205	0.174931	0.81804
C2orf42	-0.210623	0.274759	-0.208734	0.797117
C2orf47	0.425863	0.0638059	0.313161	0.724336
C2orf49	0.327315	0.0413946	0.24216	0.693548
C2orf50	0.207609	0.344553	-0.125276	0.824309
C2orf68	-0.267235	0.16673	-0.062799	0.755264
C2orf69	-0.0588964	0.757546	-0.170942	0.951411
C2orf72	-0.172599	0.129594	0.0158784	0.7461
C2orf74	-0.109922	0.552542	-0.177427	0.896807
C2orf76	0.00243207	0.990623	0.0859212	0.997691
C2orf80	0.0176628	0.935075	-0.404377	0.988813
C2orf82	-0.108358	0.705435	0.196689	0.93712
C2orf88	0.0740257	0.660976	-0.0710399	0.928023
C3	-0.288627	0.0759204	-0.0231351	0.724336
C3AR1	0.176704	0.480506	0.144725	0.872311
C3orf14	0.364801	0.0424711	-0.117952	0.693548
C3orf18	-0.180917	0.263928	-0.0256812	0.797117
C3orf20	-0.429241	0.0741807	-0.418576	0.724336
C3orf33	0.276565	0.156585	0.20057	0.753022
C3orf35	0.117164	0.549255	0.048761	0.895279
C3orf38	0.327847	0.0502404	0.178307	0.70819
C3orf49	0.778944	0.00343596	0.401349	0.616144
C3orf58	0.162568	0.277148	0.00209597	0.797117
C3orf62	0.14763	0.431682	0.224447	0.855147
C3orf67	0.0960333	0.741466	-0.188369	0.946319
C3orf70	-0.344824	0.00138013	-0.0832229	0.616144
C3orf80	0.392704	0.0763213	-0.0780829	0.724336
C4orf19	0.110801	0.626277	0.134139	0.919435
C4orf3	-0.17636	0.116216	-0.0239202	0.740238
C4orf32	-0.0106687	0.96592	-0.115672	0.9949
C4orf33	0.0494708	0.814136	-0.289727	0.966392
C4orf46	-0.175738	0.436897	-0.181419	0.857899
C4orf47	-0.0150321	0.949772	-0.141864	0.991454
C4orf48	-0.0803974	0.703136	-0.18625	0.936211
C4orf50	-0.0955567	0.447607	-0.14137	0.864989
C5	0.00585164	0.978441	0.178951	0.995807
C5AR1	0.281274	0.179151	0.220101	0.765827
C5orf15	0.0336503	0.860533	-0.105005	0.97629
C5orf22	0.317297	0.114149	-0.0385299	0.739781
C5orf24	0.0322194	0.765854	0.013404	0.954905
C5orf30	0.209436	0.0982161	0.097953	0.727282
C5orf34	0.255712	0.355522	0.120577	0.825327
C5orf42	0.016937	0.868914	-0.0498676	0.977874
C5orf45	-0.0231102	0.912077	-0.0393739	0.986662
C5orf49	0.108414	0.63453	0.0051379	0.922222
C5orf51	0.0727861	0.573525	-0.0117061	0.901895
C5orf56	0.261125	0.307357	0.153121	0.81391
C5orf63	0.108061	0.636778	0.0100067	0.922408
C5orf64	-0.508908	0.0177732	-0.059481	0.65523
C5orf66	0.256452	0.341256	0.161824	0.823414
C6orf1	-0.100192	0.588569	0.169767	0.905391
C6orf106	-0.0623632	0.460976	-0.0104921	0.869026
C6orf118	-0.167814	0.499499	-0.0069168	0.88117
C6orf120	0.02964	0.877493	-0.169653	0.979929
C6orf163	-0.138573	0.501028	-0.274204	0.881495
C6orf201	-0.191308	0.492281	-0.22229	0.877299
C6orf203	0.0742214	0.718158	0.0674017	0.941594
C6orf62	-0.0880148	0.35167	0.0060638	0.82514
C6orf89	-0.0629472	0.352648	-0.0656953	0.82514
C7	0.135224	0.623561	0.256582	0.918921
C7orf13	-0.128034	0.541299	-0.147768	0.894256
C7orf25	0.0012739	0.993948	-0.140037	0.998357
C7orf26	0.0903575	0.646523	0.125367	0.9245
C7orf31	0.235645	0.384133	0.288981	0.838703
C7orf43	0.0379529	0.868534	0.0673017	0.977768
C7orf49	0.109173	0.564829	0.237032	0.90088
C7orf50	-0.04225	0.855863	0.145716	0.975289
C7orf61	-0.183251	0.530374	0.0759078	0.891836
C7orf71	-0.0176052	0.93972	0.00747432	0.990057
C7orf73	-0.198754	0.238393	-0.0624582	0.792332
C8orf33	-0.0980309	0.408811	0.0921169	0.848106
C8orf34	0.280332	0.216194	0.0910425	0.784494
C8orf37	-0.245441	0.318273	-0.433626	0.816076
C8orf4	-0.0381762	0.860983	-0.133113	0.976563
C8orf44	0.00743302	0.973897	-0.246448	0.995662
C8orf46	-0.0656098	0.420869	-0.159278	0.852965
C8orf48	-0.101425	0.666326	-0.153757	0.92892
C8orf58	-0.230574	0.341922	-0.0615414	0.823739
C8orf59	0.348368	0.137784	0.0781304	0.7461
C8orf82	0.178668	0.4032	0.146253	0.845782
C8orf88	0.238224	0.30097	0.275828	0.810217
C9orf131	0.0547276	0.730285	0.0481233	0.942844
C9orf139	-0.393383	0.0718476	-0.0904794	0.724336
C9orf142	-0.0706581	0.79278	0.163567	0.960373
C9orf16	-0.189242	0.565553	0.112668	0.90088
C9orf170	0.0691385	0.654287	0.0627177	0.927975
C9orf172	-0.0841688	0.773947	0.22659	0.956664
C9orf24	0.302732	0.177638	0.30371	0.76432
C9orf3	-0.0147231	0.867338	0.0820976	0.9776
C9orf40	0.228036	0.349982	0.0622971	0.82514
C9orf41-AS1	0.00739127	0.972619	-0.198751	0.995662
C9orf47	-0.328213	0.0728138	-0.1376	0.724336
C9orf64	0.0834804	0.762621	0.0556372	0.953805
C9orf69	-0.116464	0.545658	0.124835	0.894256
C9orf72	0.266857	0.099555	-0.0238581	0.727297
C9orf78	-0.18321	0.214125	-0.205581	0.784494
C9orf84	-0.0696223	0.781988	-0.0986045	0.958089
C9orf85	-0.0698358	0.772535	-0.11709	0.956228
CA1	-0.25239	0.325034	-0.395287	0.819036
CA10	0.435678	0.00596578	-0.0397822	0.616144
CA11	-0.149682	0.195429	-0.0288982	0.776436
CA12	-0.340523	0.246198	-0.204015	0.792979
CA13	0.131272	0.547785	-0.0707727	0.894955
CA14	0.261781	0.271146	0.280581	0.797117
CA2	-0.209086	0.199349	-0.0415413	0.776436
CA3	-0.0599167	0.752415	-0.271373	0.949601
CA4	-0.34683	0.156503	-0.114713	0.753022
CA5B	-0.0800621	0.688131	-0.00636998	0.93179
CA5BP1	-0.147098	0.518605	-0.0437807	0.888282
CA7	-0.219973	0.302447	-0.229155	0.811318
CA8	0.220979	0.308755	0.0867738	0.814491
CAAP1	-0.0719657	0.753857	-0.18615	0.950434
CAB39	0.156755	0.115374	-0.00336029	0.740238
CAB39L	0.00758399	0.953111	-0.0961811	0.992297
CABIN1	-0.191193	0.128303	-0.0160924	0.7461
CABLES1	-0.171667	0.223127	-0.0221743	0.790605
CABLES2	-0.445055	0.0332314	-0.295772	0.693548
CABP1	0.0339216	0.802903	-0.0689083	0.963065
CABP4	0.513656	0.0176903	0.569335	0.65523
CABP7	-0.338514	0.276909	-0.058775	0.797117
CABYR	-0.281635	0.146969	-0.254587	0.751924
CACFD1	-0.296003	0.217252	0.124603	0.784887
CACHD1	0.040406	0.713444	0.107163	0.940497
CACNA1A	-0.0904357	0.468479	-0.107616	0.870252
CACNA1B	-0.105344	0.328109	-0.151688	0.820699
CACNA1C	-0.0424671	0.684906	-0.0575531	0.931362
CACNA1C-AS1	0.43804	0.0760757	0.393338	0.724336
CACNA1C-AS2	-0.415686	0.130858	-0.360555	0.7461
CACNA1C-AS4	0.302501	0.220091	-0.0437299	0.786565
CACNA1C-IT3	0.298959	0.230836	0.0175096	0.792269
CACNA1D	-0.141797	0.201527	-0.240568	0.776436
CACNA1E	0.00572404	0.939244	-0.207994	0.990057
CACNA1G	0.0791472	0.748608	0.15517	0.948884
CACNA1H	-0.104591	0.696704	0.0543052	0.934582
CACNA1I	-0.250267	0.180445	-0.11692	0.767703
CACNA2D1	0.123079	0.327634	-0.175317	0.82045
CACNA2D2	-0.158784	0.42866	-0.220146	0.854019
CACNA2D3	0.0327732	0.736413	-0.221353	0.944663
CACNA2D3-AS1	0.270556	0.189657	-0.0492876	0.776436
CACNA2D4	0.330771	0.151516	0.45632	0.752966
CACNB1	-0.164945	0.205267	-0.203948	0.778351
CACNB2	0.00670499	0.955275	-0.203616	0.992552
CACNB3	-0.166153	0.304628	-0.106344	0.81201
CACNB4	0.162751	0.203694	-0.177419	0.777116
CACNG2	0.033608	0.789689	-0.0149653	0.959841
CACNG3	0.187032	0.238931	-0.024405	0.792332
CACNG4	-0.296376	0.129106	0.0272192	0.7461
CACNG5	0.193441	0.390764	0.395764	0.842083
CACNG7	-0.00257919	0.990274	0.00320243	0.997691
CACNG8	-0.0120899	0.917885	-0.118608	0.987246
CACTIN	0.280032	0.212239	0.419377	0.782121
CACUL1	0.0413048	0.706378	-0.0628143	0.937885
CACYBP	0.0947808	0.563658	-0.109299	0.90088
CAD	0.067934	0.647088	0.161521	0.924686
CADM1	0.0747645	0.422963	0.0121094	0.853573
CADM2	0.213407	0.0482854	-0.0403659	0.70819
CADM2-AS1	-0.208717	0.325971	-0.42455	0.819645
CADM2-AS2	0.290645	0.267984	0.232277	0.797117
CADM3	-0.0541041	0.548461	-0.133081	0.895047
CADM3-AS1	-0.0227428	0.904169	-0.0724259	0.98536
CADM4	-0.0807547	0.584949	0.103446	0.905084
CADPS	0.0672899	0.464073	-0.292887	0.869439
CADPS2	0.29489	0.00629317	-0.0392011	0.616144
CALB1	0.0946817	0.614013	-0.401597	0.914642
CALB2	-0.362343	0.092863	-0.568019	0.724997
CALCOCO1	-0.125515	0.171393	-0.101668	0.757427
CALCOCO2	0.00625703	0.942527	0.134216	0.990057
CALCRL	0.0127022	0.950005	-0.0231177	0.991454
CALD1	0.0901085	0.386069	0.209441	0.83972
CALHM1	0.307846	0.165308	0.166196	0.755046
CALHM2	0.107156	0.629193	0.181386	0.920006
CALM1	0.181281	0.107535	-0.145589	0.73497
CALM2	0.190406	0.0957471	-0.0688687	0.726657
CALM3	-0.0229813	0.764655	-0.16271	0.954504
CALML4	-0.398007	0.0492722	-0.157588	0.70819
CALN1	0.237094	0.019382	0.0261487	0.658347
CALR	0.20065	0.084331	0.101644	0.724336
CALU	0.0267581	0.819962	-0.0780018	0.96783
CALY	-0.16348	0.46058	-0.378352	0.869026
CAMK1	-0.211254	0.230531	-0.136487	0.792269
CAMK1D	-0.0123133	0.866986	-0.0678667	0.9776
CAMK1G	0.116221	0.45139	-0.260749	0.866373
CAMK2A	-0.12534	0.147544	-0.188928	0.751924
CAMK2B	-0.0776582	0.580335	-0.0596947	0.9036
CAMK2D	0.107808	0.39711	-0.172034	0.844137
CAMK2G	0.0190188	0.784479	-0.0675082	0.958653
CAMK2N1	-0.0923063	0.250578	-0.190401	0.794826
CAMK2N2	-0.554242	0.000498643	-0.269115	0.616144
CAMK4	0.198951	0.318955	-0.168259	0.816323
CAMKK1	-0.207007	0.159762	-0.193681	0.753301
CAMKK2	-0.015021	0.827415	-0.156956	0.969887
CAMKMT	0.0558095	0.805686	0.132659	0.963927
CAMKV	-0.166524	0.0859929	-0.326582	0.724336
CAMLG	-0.0142587	0.912689	-0.197529	0.986662
CAMSAP1	-0.0380108	0.623868	-0.0256541	0.919066
CAMSAP2	0.0710975	0.397149	-0.0628694	0.844137
CAMSAP3	-0.482294	0.094027	-0.251829	0.724997
CAMTA1	0.176548	0.0148133	-0.00408015	0.65523
CAMTA2	-0.197528	0.251071	-0.0356279	0.795142
CAND1	0.200394	0.0851936	-0.0615566	0.724336
CAND2	-0.105134	0.550838	-0.0513231	0.896365
CANT1	-0.359277	0.129117	-0.204402	0.7461
CANX	0.160783	0.0658391	-0.00921649	0.724336
CAP1	0.203053	0.0441911	0.0612185	0.700896
CAP2	0.108006	0.397782	-0.277887	0.844137
CAPG	0.0991584	0.701037	0.281433	0.936139
CAPN1	0.0662077	0.700368	0.148144	0.93601
CAPN10	-0.358123	0.236547	-0.0517938	0.792332
CAPN10-AS1	0.0358589	0.875679	0.243568	0.979816
CAPN14	0.0951811	0.657188	-0.0249264	0.928023
CAPN15	-0.421123	0.119841	0.0144898	0.741036
CAPN2	-0.0684386	0.51935	0.0210582	0.888282
CAPN3	0.0515121	0.631304	0.239392	0.92065
CAPN5	-0.294191	0.0905827	-0.0695914	0.724997
CAPN7	0.147265	0.272077	-0.0259091	0.797117
CAPN9	-0.390229	0.217894	0.0237789	0.785569
CAPNS1	-0.0374926	0.723922	-0.0664891	0.941594
CAPRIN1	0.0437941	0.65138	-0.0586422	0.926223
CAPRIN2	0.103193	0.384053	-0.0348461	0.838703
CAPS	0.0519077	0.827604	0.304214	0.969887
CAPS2	-0.233495	0.138616	-0.349727	0.74691
CAPZA1	0.227118	0.109719	0.0725397	0.73497
CAPZA2	0.139555	0.352265	-0.0400917	0.82514
CAPZB	0.128503	0.183936	-0.0147806	0.772982
CARD10	0.108843	0.671404	0.476453	0.929031
CARD11	-0.0447265	0.872225	0.0574099	0.978949
CARD14	0.082275	0.735509	0.0406165	0.94417
CARD19	-0.140934	0.524818	0.0449965	0.890121
CARD6	0.112926	0.629068	0.377748	0.920006
CARD8	-0.0842503	0.488253	0.0870717	0.875013
CARD9	0.205125	0.411542	0.404475	0.84829
CARF	-0.0705249	0.63881	0.0108513	0.923484
CARHSP1	-0.390216	0.0193909	-0.088919	0.658347
CARM1	-0.266427	0.109876	-0.127486	0.73497
CARMIL1	-0.036608	0.655926	-0.107154	0.928023
CARMIL2	-0.176476	0.481069	-0.00239358	0.872311
CARMIL3	-0.166204	0.520174	-0.105619	0.888282
CARMN	-0.0280163	0.92869	0.274512	0.988132
CARNMT1	-0.0370034	0.840142	-0.0712602	0.973556
CARNS1	0.0419088	0.866918	0.54476	0.9776
CARS2	-0.130721	0.306685	-0.0461896	0.813811
CARTPT	0.112625	0.721497	-0.153532	0.941594
CASC1	0.118837	0.575146	-0.0799172	0.902442
CASC10	-0.46984	0.0721141	-0.319409	0.724336
CASC15	0.209194	0.35495	0.164313	0.825243
CASC2	0.0866467	0.752725	0.0505461	0.94971
CASC3	-0.15512	0.0694314	0.0744377	0.724336
CASC4	-0.0526348	0.572408	-0.00890999	0.901552
CASD1	0.256362	0.0613147	-0.101796	0.724336
CASK	0.00390686	0.973613	-0.0482883	0.995662
CASKIN1	-0.25827	0.370013	0.141503	0.834786
CASKIN2	-0.141108	0.592766	0.220214	0.905974
CASP1	-0.0437258	0.892635	-0.0844383	0.984272
CASP10	0.192153	0.398245	0.311071	0.844137
CASP2	-0.120956	0.473557	-0.0031004	0.871439
CASP3	0.0626781	0.775676	0.115077	0.956816
CASP4	-0.163162	0.542619	0.166462	0.894256
CASP6	0.0896256	0.726981	0.191066	0.942337
CASP7	0.122595	0.571442	0.181593	0.901307
CASP8	0.630492	0.00375945	0.358938	0.616144
CASP8AP2	-0.0817225	0.497829	-0.00747261	0.880758
CASP9	0.0848788	0.670163	0.00594834	0.929031
CASQ1	0.385958	0.0802495	0.0607636	0.724336
CASS4	0.301774	0.20673	0.238994	0.778876
CAST	-0.0317555	0.664196	0.0110803	0.928509
CASZ1	-0.401022	0.208023	-0.231753	0.778911
CAT	0.0457065	0.773278	0.0200448	0.956393
CATSPER2	0.0665472	0.782931	0.0142785	0.958636
CATSPERG	-0.0444608	0.821869	0.113379	0.968411
CAV1	0.306462	0.231196	0.274926	0.792269
CAV2	-0.186345	0.428064	-0.340672	0.853697
CBARP	-0.623013	0.0498105	-0.48309	0.70819
CBFA2T2	-0.0424489	0.631443	0.0713024	0.920674
CBFA2T3	-0.0497338	0.842283	0.0485818	0.973979
CBFB	0.192486	0.228623	0.25774	0.791435
CBL	-0.00434812	0.961995	0.000270353	0.993968
CBLB	0.188505	0.334931	0.0501322	0.823159
CBLL1	0.156251	0.359773	0.0133169	0.827376
CBLN1	0.190471	0.290285	-0.128051	0.805263
CBLN2	0.105018	0.496318	-0.247277	0.879891
CBLN4	0.561348	0.0137882	0.1368	0.65523
CBR1	0.14464	0.37144	0.151264	0.835671
CBR3	-0.250022	0.347003	-0.0415367	0.825034
CBR3-AS1	-0.0537782	0.855495	-0.0976486	0.975289
CBR4	0.102624	0.512131	-0.0140173	0.886693
CBS	0.284713	0.225828	0.379509	0.791435
CBSL	-0.337803	0.0923021	-0.22472	0.724997
CBWD1	0.111836	0.63432	-0.0125182	0.922222
CBWD2	0.244367	0.236645	-0.0282436	0.792332
CBWD5	0.413859	0.136112	0.175636	0.7461
CBX1	0.192251	0.169337	0.128054	0.756298
CBX3	0.044828	0.716657	-0.0406163	0.941398
CBX4	0.121984	0.535461	0.126217	0.893344
CBX5	0.0470674	0.470019	-0.0130765	0.870914
CBX6	-0.250866	0.0976266	-9.77e-05	0.726753
CBX7	-0.334673	0.00948063	-0.110125	0.65523
CBY1	-0.0908039	0.654635	-0.0839563	0.928023
CC2D1A	-0.06658	0.768961	0.0825378	0.955237
CC2D1B	-0.275164	0.0966407	-0.0850467	0.726657
CC2D2A	0.152769	0.246968	0.122346	0.792979
CC2D2B	0.620101	0.00451106	0.436654	0.616144
CCAR1	0.00300719	0.979418	0.0687393	0.996143
CCAR2	0.00988122	0.922771	0.0424632	0.987644
CCBE1	0.024376	0.920555	-0.0668886	0.987477
CCDC102B	-0.0706202	0.7266	0.0441554	0.942234
CCDC103	-0.447007	0.0975363	-0.195952	0.726657
CCDC106	-0.00921173	0.973771	0.200865	0.995662
CCDC110	-0.157244	0.525653	-0.168605	0.890137
CCDC112	0.0573101	0.801354	-0.226516	0.962785
CCDC113	-0.118222	0.544901	-0.173186	0.894256
CCDC115	0.366107	0.0358269	0.304663	0.693548
CCDC117	-0.0106413	0.949014	-0.0908878	0.991454
CCDC12	0.0169025	0.937228	0.0656821	0.989452
CCDC120	-0.214917	0.372671	-0.00722305	0.836065
CCDC121	0.466117	0.0272732	0.411986	0.691683
CCDC122	-0.350432	0.139539	-0.225497	0.747841
CCDC124	-0.250606	0.498896	-0.0999945	0.88117
CCDC126	0.0794194	0.712217	0.0138687	0.94035
CCDC127	0.0132954	0.949232	-0.222467	0.991454
CCDC129	-0.607562	0.0106981	-0.365541	0.65523
CCDC13	-0.0753343	0.732639	0.127409	0.943666
CCDC130	0.0422109	0.849211	0.208906	0.974882
CCDC134	0.0357392	0.857809	0.170032	0.975345
CCDC136	-0.229442	0.0262649	-0.152726	0.691683
CCDC137	-0.160968	0.461688	-0.244718	0.869026
CCDC138	-0.047943	0.808815	-0.110667	0.965075
CCDC14	0.340458	0.0143715	0.187046	0.65523
CCDC141	0.122991	0.603183	0.357152	0.910399
CCDC142	-0.347568	0.100617	-0.167232	0.728071
CCDC144A	0.219596	0.232745	0.171683	0.792269
CCDC144B	0.0503051	0.797898	0.0767369	0.962192
CCDC144CP	0.0583331	0.748981	0.120639	0.948973
CCDC144NL	0.126046	0.661339	0.115185	0.928023
CCDC146	-0.159183	0.401634	-0.0787823	0.844954
CCDC148	-0.169888	0.488504	-0.109806	0.875052
CCDC149	0.0627561	0.453619	0.0393276	0.866373
CCDC15	0.017836	0.930162	0.104703	0.988314
CCDC151	0.222261	0.35234	0.197925	0.82514
CCDC152	-0.647886	0.0058682	-0.46734	0.616144
CCDC154	0.0575002	0.836536	0.241093	0.97254
CCDC158	0.22306	0.295296	0.117345	0.80767
CCDC159	-0.100454	0.651777	0.0468093	0.926299
CCDC160	0.219419	0.347245	0.183034	0.825034
CCDC163	-0.524842	0.039549	-0.473626	0.693548
CCDC167	-0.150419	0.543882	0.0131201	0.894256
CCDC168	0.111276	0.606967	-0.12264	0.912025
CCDC17	0.317625	0.234991	0.326664	0.792332
CCDC170	0.409648	0.150138	0.415772	0.752775
CCDC171	-0.0636189	0.687431	-0.10796	0.931574
CCDC173	0.172	0.508277	0.0994615	0.88488
CCDC174	-0.22182	0.166321	-0.153179	0.755264
CCDC175	0.0706073	0.70342	-0.0522769	0.936226
CCDC177	-0.00256654	0.990734	-0.0102283	0.997691
CCDC18	-0.0764125	0.662611	-0.150748	0.928417
CCDC18-AS1	0.162593	0.327162	0.153596	0.820136
CCDC181	0.286984	0.202046	-0.00625395	0.776436
CCDC183	-0.466067	0.0524887	-0.075709	0.70819
CCDC183-AS1	-0.240274	0.373314	-0.0315977	0.836105
CCDC184	0.122661	0.591839	-0.14177	0.905974
CCDC186	0.028789	0.816596	-0.105493	0.967181
CCDC190	0.126207	0.674123	0.148292	0.929031
CCDC191	0.011917	0.950424	0.064406	0.991454
CCDC22	-0.255863	0.311769	0.0278288	0.815583
CCDC24	-0.0219348	0.924589	0.00264378	0.987934
CCDC25	0.256246	0.0763	0.0769263	0.724336
CCDC28A	0.273445	0.14607	-0.0678655	0.751924
CCDC28B	-0.0720313	0.739962	0.0695644	0.945894
CCDC3	0.0222618	0.835388	0.0500064	0.972123
CCDC30	-0.273655	0.0416263	-0.296764	0.693548
CCDC34	0.311336	0.248782	0.0600253	0.794237
CCDC36	-0.16823	0.476948	-0.161819	0.872311
CCDC38	0.442787	0.0479715	0.344018	0.70819
CCDC39	0.328699	0.100811	-0.021147	0.728364
CCDC40	-0.267582	0.25657	-0.0640972	0.795259
CCDC43	0.189664	0.318633	0.0540135	0.816318
CCDC47	0.270807	0.0121559	0.0765737	0.65523
CCDC50	-0.0380704	0.672242	0.05509	0.929031
CCDC51	0.0470814	0.86514	0.191212	0.977306
CCDC53	0.244122	0.218804	0.123611	0.785864
CCDC57	-0.163418	0.31673	-0.0746859	0.815966
CCDC58	0.677	0.0013662	0.495492	0.616144
CCDC59	0.221261	0.29851	0.146044	0.808215
CCDC6	0.0236637	0.814576	-0.146807	0.966557
CCDC60	0.0904349	0.646837	-0.0777371	0.9245
CCDC61	-0.319425	0.165058	-0.0524893	0.755046
CCDC62	0.100165	0.625534	0.023598	0.919356
CCDC65	0.125836	0.523783	-0.0711601	0.889332
CCDC66	-0.141228	0.289791	-0.187762	0.804328
CCDC68	0.0874257	0.75057	-0.0899619	0.949358
CCDC69	-0.348942	0.0945656	-0.18025	0.725535
CCDC7	-0.0590572	0.555353	0.0633578	0.897443
CCDC71	0.098321	0.59206	0.16494	0.905974
CCDC71L	0.160675	0.466554	0.155357	0.869782
CCDC74A	-0.00136654	0.994754	0.0483466	0.998593
CCDC74B	-0.246146	0.228976	-0.151559	0.791435
CCDC77	-0.1796	0.354986	-0.144919	0.825243
CCDC78	-0.355995	0.243965	0.0813951	0.792332
CCDC8	0.218882	0.338527	0.217027	0.823159
CCDC80	0.0980975	0.70288	0.307236	0.936211
CCDC81	-0.0957474	0.733641	0.268741	0.943666
CCDC82	0.142869	0.266544	0.0463052	0.797117
CCDC84	-0.0759718	0.700697	-0.141723	0.93601
CCDC85A	0.0427549	0.789928	-0.174501	0.959841
CCDC85B	-0.173203	0.559654	0.0579975	0.899314
CCDC85C	-0.139299	0.431197	0.00757087	0.855054
CCDC86	-0.158965	0.529148	-0.0672266	0.891165
CCDC88A	0.0216212	0.763861	0.134841	0.954189
CCDC88B	-0.263052	0.344888	0.140592	0.824309
CCDC88C	-0.422617	0.0724084	-0.196396	0.724336
CCDC9	-0.265	0.163242	0.0892883	0.755046
CCDC90B	0.197632	0.2491	0.158909	0.794237
CCDC91	-0.119255	0.362565	-0.198019	0.829183
CCDC92	0.441267	0.0157588	0.433618	0.65523
CCDC93	0.0599089	0.536992	0.0439351	0.893344
CCDC94	-0.268488	0.205086	-0.173329	0.778351
CCDC97	-0.549915	0.0129962	-0.252121	0.65523
CCK	-0.00540261	0.969277	-0.235105	0.995646
CCKBR	0.0914408	0.635074	-0.0604241	0.922222
CCM2	-0.4153	0.0860227	-0.144697	0.724336
CCM2L	-0.255779	0.275066	-0.0692282	0.797117
CCNA1	0.244845	0.265963	0.0607957	0.797117
[truncated: 13,347 more rows]
