# Supplementary material for: Psychosis in Alzheimer’s Disease is Associated with Excitatory Neuron Vulnerability and Post-Transcriptional Mechanisms Altering Synaptic Protein Levels
Source: medRxiv preprint, doi:10.1101/2021.09.07.21262904, version 2 (2021-11-11)
Supplement: Supplemental File 4 [file 262904_file07.xlsx]

## Sheet: Read Me
Legend	Description
Columns	Module ID Number from MEGENA Clustering
Gene	Gene Symbol
YES	Indicates Gene belonging in module

## Sheet: Data_S_04
Gene	c1_2	c1_3	c1_4	c1_5	c1_6	c1_11	c1_13	c1_14	c1_15	c1_16	c1_17	c1_18	c1_20	c1_21	c1_22	c1_24	c1_25	c1_26	c1_27	c1_29	c1_30	c1_31	c1_32	c1_33	c1_34	c1_35	c1_36	c1_37	c1_39	c1_40	c1_41	c1_42	c1_43	c1_44	c1_45	c1_46	c1_47	c1_48	c1_49	c1_50	c1_51	c1_52	c1_53	c1_54	c1_55	c1_56	c1_57	c1_58	c1_59
APC2	YES
ND1		YES
CYTB		YES
CLTC			YES
ATP6V1A				YES
SNAP25					YES
FASN						YES
GABRA1							YES
OXR1				YES
RTN3				YES
SCN2A				YES
NAPB				YES
NAP1L3					YES
CALM2			YES
BCAS1								YES
GPR37L1									YES
CHN1										YES
SYT1				YES
ATP2B1											YES
ND4		YES
ATN1												YES
PIP5K1C												YES
G3BP2				YES
RAB3C							YES
BAG3													YES
GABRB2											YES
GLRB					YES
INPP5F				YES
ATP1B1					YES
PREPL				YES
ATP6V1C1				YES
LRP3												YES
NELL2				YES
ANK2					YES
PDP1							YES
CSRNP3											YES
MTRNR2L8														YES
HIPK2								YES
PFN2				YES
NEGR1				YES
LPAR1								YES
ADGRG1									YES
SBF1															YES
PJA2			YES
ATP8														YES
FGF12							YES
NPTN					YES
HSP90AA1																YES
PPP3CA					YES
EEF2																	YES
MDH1					YES
GDA				YES
LAMA5	YES
MEF2C											YES
ND2		YES
DYNC1LI2								YES
ATP6		YES
REEP5				YES
YWHAB				YES
PALM												YES
MAP4								YES
PAQR6								YES
ATP6V1B2				YES
MAP2							YES
PGM2L1				YES
GABRG2							YES
STMN2					YES
CIC	YES
ATRNL1										YES
MYO10									YES
GLS											YES
INTS1						YES
PNMA2				YES
LRRC8A									YES
CALM1											YES
NCDN																		YES
RTN1				YES
KIF1A						YES
INA					YES
NDFIP1			YES
PSD																	YES
CEP170B															YES
GIT1																			YES
EIF4A2										YES
CTNNA3																				YES
CHL1											YES
DCLK1							YES
GRIN2A											YES
MROH1						YES
GABARAPL1				YES
MTSS1L																					YES
FBXW7				YES
MAP4K4								YES
AATK																						YES
ATP6AP2				YES
PAIP2B								YES
KIF1C		YES
CACNB4							YES
SV2B				YES
PAFAH1B1			YES
NECAB1				YES
DNAJC6				YES
SLC39A10			YES
PLEKHM2												YES
PCMT1										YES
ATP5B			YES
MAPK8IP3						YES
SLC4A10											YES
ADGRB2															YES
GNA12																					YES
SNCA				YES
DAAM2								YES
SHANK3												YES
ACAP3															YES
LMTK3						YES
PAK3							YES
NACC2																					YES
ANKRD40								YES
NCOR2	YES
ACSS1									YES
ATP5A1			YES
PPP3CB				YES
ENC1					YES
PREX1																							YES
ADGRL1																			YES
DNAJB14			YES
KIF3A				YES
FBXL16												YES
TLN1																							YES
DVL1															YES
ELMOD1							YES
PITPNM1															YES
PLEC	YES
SNX10				YES
GNG2				YES
CAND1										YES
OPA1			YES
KNDC1						YES
KIFC2						YES
MYCBP2				YES
GUCY1B3				YES
KCNC2							YES
PBXIP1									YES
BTBD2												YES
AIF1L								YES
CENPB		YES
GDAP1			YES
REXO1															YES
DNAJA1																YES
FKBP8	YES
GABRA4											YES
CLIP2																			YES
ADAM22											YES
EPHA4											YES
ITPKB																							YES
JPH3												YES
KMT2D																								YES
GRIA2											YES
PLK2				YES
CELSR2															YES
BSN																									YES
RCAN2				YES
COPG2IT1							YES
LMO4											YES
MEGF8	YES
MGLL																					YES
PDZD4																	YES
BEX1				YES
HCN2												YES
YWHAG					YES
B3GAT1																			YES
SH3GL2					YES
DCHS1									YES
ADAM23											YES
CSPG4																					YES
MOBP																				YES
ATL1			YES
NAP1L2											YES
ATP6V1E1				YES
MLLT11					YES
DYNC1I1					YES
PDK3				YES
EPN1												YES
DGKZ															YES
KIAA1107					YES
MYO5A											YES
CBX6															YES
FGFR3									YES
RGS4				YES
CADPS					YES
USP9Y																										YES
AASDHPPT			YES
PRKACB											YES
NBEA											YES
CD47											YES
MGAT5B																	YES
APP				YES
NDFIP2				YES
OPCML					YES
SERPINI1				YES
TNS1																							YES
DSTN				YES
FGF1								YES
NECAP1				YES
CASKIN1															YES
CADM2																								YES
CLVS2											YES
EEF1A2																		YES
PLXNB1																					YES
SEPT4																				YES
LTBP3																					YES
VSNL1					YES
KCTD16											YES
NDST1																					YES
ENO2																											YES
ND4L		YES
KIFAP3				YES
STXBP5L					YES
TNK2															YES
AGRN															YES
MAP1B				YES
SHTN1																				YES
MICALL2	YES
RAB27B				YES
NFIX																					YES
CNTN1											YES
FOXO4		YES
PPP2CA											YES
LYNX1															YES
PKD1						YES
EPT1											YES
GHITM				YES
CTBP1																	YES
KCNQ2																	YES
FAM107A				YES
MAP3K10															YES
FAM65A															YES
STMN1				YES
SDC3									YES
POLR2B										YES
GPC1	YES
NUDT21			YES
GIGYF1															YES
ARL8B											YES
MLC1									YES
HSPA12A											YES
FYCO1		YES
DDX1				YES
PEG3											YES
BCR																	YES
ABCA3																	YES
SLC7A5																							YES
PLEKHB1		YES
COL6A1						YES
MIB2	YES
ELFN2																	YES
B4GALT6											YES
NAP1L5				YES
PLCB1							YES
FAM49A				YES
PDXK															YES
CAMK2B																		YES
CAP2											YES
KDM5D																										YES
1				YES
BRSK1															YES
DOCK1								YES
CEND1																	YES
CHD5																									YES
MAVS																							YES
SEPT9												YES
NLGN4Y																										YES
ANXA6																											YES
AK5					YES
AMOT																												YES
ATP13A2	YES
CNKSR2											YES
ATP6V1D			YES
CD81																																				YES
NRXN1																							YES
MAPK8IP1	YES
ZBTB47		YES
SNTA1									YES
LRP10																							YES
PNPLA6															YES
AKAP11																								YES
ADGRB1															YES
ITFG1			YES
COX2		YES
SH3PXD2A								YES
DNAJC5															YES
TTTY15																										YES
GRIN1																		YES
CHIC1				YES
GABRB3					YES
ATP8A2											YES
PAK1					YES
SLC38A10	YES
MAP2K4											YES
AGAP2																	YES
NARS			YES
KCNAB2																	YES
JPH4						YES
MORF4L2					YES
DMXL2							YES
GAREM2																					YES
AKT2																								YES
NCOA7											YES
ATP1A1					YES
KIAA0930																								YES
ARL6IP5										YES
DAB2IP																			YES
IQSEC2																									YES
GPR158											YES
MBD3	YES
MAPK10					YES
HDAC5	YES
CSRP1																					YES
PKN1									YES
DLGAP4																			YES
CERCAM																						YES
DNM1L				YES
MLLT1																			YES
CREG2				YES
BAP1															YES
GNG7																					YES
GRK2																	YES
LRRC4B	YES
PACS2																						YES
ATP8A1			YES
FOXK1																								YES
PCNX3															YES
NRXN2															YES
GUK1															YES
CASKIN2																					YES
MYH9																					YES
LRP1																	YES
IPCEF1				YES
PRKAR2B											YES
APOE									YES
TXLNGY																										YES
NOTCH3																							YES
FLNA	YES
CTNND2											YES
AHDC1	YES
NFIC																					YES
CLCN7	YES
SCAP									YES
KIF5B								YES
BOK		YES
GRIN2B					YES
MAP1S						YES
ITM2C									YES
GPSM1												YES
ABCA2																						YES
ACSL4											YES
LRPPRC			YES
LDB2											YES
NAT8L	YES
ARHGEF40																					YES
HMGCR			YES
NOTCH1																					YES
FAT3																					YES
FBXW5	YES
GOT1					YES
CDK14							YES
ARHGEF17															YES
REPS2											YES
KCNQ5											YES
FAM193B												YES
ARHGAP31																												YES
NUMA1															YES
CDK18																						YES
SLC6A8																					YES
SLCO1A2																				YES
TAGLN3																											YES
CNTNAP2					YES
MAPK9					YES
COMT												YES
DENND4B																			YES
NAPG				YES
AP3D1																	YES
PRKAR1A			YES
PDGFRB																					YES
PPP6R1															YES
C15orf59												YES
RAPGEF1																					YES
RAN			YES
SMOX																					YES
EPDR1					YES
GUCY1A2											YES
CGNL1																												YES
CACNA2D1											YES
TRIM41		YES
OBSCN															YES
RAI1															YES
HSP90AB1																YES
ARAP1																								YES
GNA11																					YES
ALDH4A1									YES
DYNLT3			YES
LRIG1									YES
HSPA4																YES
HERC1																					YES
BCL9L		YES
NCALD				YES
FBXL18												YES
MTURN								YES
KIAA1549L											YES
CTDSP1		YES
NYAP1															YES
HIF3A									YES
ACTR2				YES
MMP17						YES
DGCR2															YES
SCN1A											YES
MCF2L															YES
SGSM2																	YES
NETO1				YES
DNM3			YES
GAB2								YES
LRP4					YES
BRD4															YES
LOC100129034									YES
BAHCC1	YES
RPL18									YES
HIP1																							YES
PHF2																					YES
6			YES
ABL1																					YES
ARHGDIA	YES
ARL6IP1			YES
NLGN2												YES
NDRG2									YES
DGKQ						YES
DIRAS2											YES
BMPR2											YES
DNAJA2							YES
HIP1R																					YES
MXD4												YES
HTR2A							YES
BRAF				YES
ERMN																				YES
C9orf16						YES
BCAT1			YES
GPRASP1											YES
FAM129B																							YES
DCAF6											YES
PNMAL1																											YES
RAB6A				YES
KLHL5								YES
PGRMC1				YES
PDDC1												YES
MATR3											YES
SUB1				YES
MBP								YES
NISCH																									YES
SUCLA2			YES
SH3TC2																				YES
FBXW4		YES
PPP3R1					YES
ANKRD11																								YES
FAM49B				YES
PLIN4									YES
NOTCH2									YES
INF2																						YES
FAM126B											YES
CDC42EP4																							YES
HCFC1												YES
OLFM3					YES
EGFL7																					YES
EPB41L3					YES
LZTS3												YES
AIFM3												YES
ANO3							YES
ANKRD46				YES
LANCL1			YES
GPR137									YES
ENHO									YES
EID1			YES
CTDSP2					YES
NCEH1					YES
BSG																	YES
ARHGEF4	YES
ATP6V1H				YES
NACC1												YES
AHSA1																YES
ALDOA																		YES
MAPK8IP2																	YES
THRA					YES
C22orf46								YES
FAM102A		YES
CKB						YES
LDHA				YES
GPM6A											YES
OLFM2																					YES
SEC14L1																							YES
ERICH3											YES
CNTNAP1																		YES
GNAI2																					YES
BEX4			YES
NCS1																								YES
PART1							YES
CBX7															YES
RASGRF2			YES
MAPK3					YES
C10orf54									YES
FBXL19						YES
AKAP6					YES
ACACB									YES
CASD1				YES
SCARA3									YES
EIF4EBP2																														YES
SLC6A15											YES
GATSL2									YES
SEMA6B															YES
CSNK1G2	YES
MPRIP																								YES
SYNE2																												YES
SGTB				YES
CABLES1									YES
PLCD3																					YES
UNC5B		YES
CAPN15	YES
ITPR1					YES
DMTN																		YES
SMTN																					YES
PITHD1				YES
CAMK2D				YES
ECE1											YES
LMBRD2							YES
INPPL1																							YES
EMX2OS																												YES
PRR12															YES
PITPNM2												YES
SALL2									YES
CHRD						YES
ND6		YES
APCDD1									YES
DPP7						YES
MALAT1			YES
PACSIN1																	YES
MIRLET7BHG												YES
KIAA1161									YES
HLF											YES
FKBP4																															YES
C10orf90																				YES
FURIN																			YES
VDAC1				YES
DDX3Y																										YES
SPTBN2																									YES
CAMTA2																	YES
MYO18A																						YES
AKT1																					YES
PIEZO1																					YES
HS6ST3											YES
PKP4								YES
MAP7D2					YES
COPS4				YES
PLCXD3				YES
PLPP3																														YES
SEPN1									YES
DNAJB1													YES
DEAF1												YES
RPL3									YES
PPP1R12C															YES
CRTC1																	YES
PTGDS									YES
KLC2																		YES
EPHA5											YES
FAXC					YES
UTY																										YES
DOCK6																							YES
B4GALNT4	YES
HSPB1													YES
ADGRL2											YES
CACYBP																YES
FLYWCH1						YES
SGIP1			YES
C1orf198																					YES
SCRT1												YES
DMWD																						YES
TMEM259	YES
NACAD																						YES
ADAP1												YES
SLC9A3R2		YES
PFKL																	YES
CTSD																	YES
AP3M2				YES
COL18A1	YES
BCAR1												YES
EFR3A							YES
HSPH1																YES
CDKL5											YES
MAN2A1																				YES
PCSK1							YES
KCNIP4											YES
ELAVL2											YES
DAG1									YES
TNS3									YES
DPP10											YES
ATG2A	YES
MAP9					YES
GOLGA3																								YES
ARHGEF9											YES
SCG2				YES
MT3									YES
HS3ST2																																YES
PXN																					YES
ADCYAP1R1																												YES
EXD3						YES
ATP1A3																																	YES
ENPP2																																		YES
FRMPD4					YES
ATP6V0E2																					YES
NEFL																											YES
BCAN																					YES
CC2D1A						YES
CDC42EP1		YES
CRB2																					YES
SOX10		YES
APLP2					YES
EVI5L												YES
CADPS2				YES
SERINC1			YES
GATAD2A																					YES
KMT2B															YES
KCNT1																									YES
NEK7								YES
MKNK2													YES
CLDN5																							YES
SMARCC1								YES
SACS											YES
BAIAP3						YES
EMID1																							YES
EIF4G1																								YES
ARRB1				YES
SLC25A46				YES
COL6A2																					YES
ATP10A																							YES
HSPA4L																YES
ITPR3																							YES
OMG			YES
TUBB4A																		YES
CHGB					YES
RIN2									YES
CDC42BPB				YES
GRIA3					YES
DOCK5																				YES
EPN2																						YES
FZR1	YES
GNAO1											YES
NRCAM											YES
PIP4K2A																				YES
TBC1D16									YES
SNPH												YES
ARHGEF10L															YES
ATP1A2									YES
RHPN1						YES
FBXO41															YES
COBL								YES
CDC42				YES
KANK2																							YES
PLXND1																					YES
CHORDC1																YES
PINK1												YES
SCAF1	YES
RPL13A					YES
BRSK2															YES
MYO15B									YES
IQSEC1												YES
GAD1				YES
BRAT1	YES
PLP1																																		YES
C11orf87											YES
SPIN1											YES
CAMTA1					YES
SLC44A2									YES
DAGLA												YES
FGFRL1									YES
ACTR10			YES
PPM1E				YES
NDRG1								YES
TGFB1		YES
PRKAA2											YES
KCNH3																	YES
PARM1							YES
HSPA8										YES
CARNS1																						YES
KIF13B								YES
CST3									YES
CNOT7											YES
FAM169A											YES
SASH1																							YES
RHOBTB3																														YES
ACTN4	YES
PLXNB3																					YES
RABL6	YES
CELSR3																									YES
MAN2C1						YES
RGS7BP											YES
PLEKHH1																						YES
NCKAP1											YES
CDH8					YES
GRIK5																			YES
LRRTM2									YES
CAB39											YES
RXRA																					YES
HMGCS1			YES
ELAVL4					YES
LHPP								YES
FADS2									YES
RUNDC3A																									YES
MICU3											YES
CPSF3L															YES
CNTN2																						YES
LIN7A											YES
C5orf22				YES
LMO3				YES
MCRIP1	YES
CTIF																									YES
SLCO2B1																							YES
CAMSAP2									YES
CCT4										YES
BCAP29			YES
SYP																											YES
PTPRS																								YES
SPNS2															YES
CD44																																				YES
PAIP2											YES
RABGAP1L				YES
1						YES
MTMR9				YES
PKIA				YES
MAP7D1	YES
ATOH8																							YES
PPP6R2															YES
HPRT1			YES
ARHGEF1															YES
GRIN2C									YES
COL16A1																					YES
LONRF2					YES
ERBIN								YES
RPS4Y1																										YES
TMCC2																			YES
EIF5										YES
ARHGAP33	YES
DBN1															YES
CLUH						YES
NUFIP2																YES
CNP																						YES
NPAS3																														YES
NHSL1									YES
NCKAP5L															YES
FZD3					YES
CERS1																					YES
ARVCF	YES
MAR3																					YES
SCAI							YES
FBXO44						YES
MAZ																			YES
CCSER2																					YES
MCM7								YES
HSPA13			YES
CADM4									YES
PTPN4											YES
GABRA3					YES
PNMAL2																		YES
C14orf2										YES
TMEM106B																								YES
MPC2											YES
ETNK1											YES
NWD1																					YES
IPO5											YES
CABIN1																	YES
DENND2A									YES
FEM1B											YES
ANKS1A																					YES
KCNJ4						YES
DLD			YES
ITGA7									YES
BMP7									YES
OAT			YES
CACFD1												YES
RFK			YES
DMPK	YES
MAP3K11																						YES
CKAP5				YES
PLXNA1																	YES
RAB2A				YES
B3GAT3	YES
ATP5O			YES
AKAP5			YES
KCNQ3					YES
SLC4A2									YES
DLG4																	YES
RAB3GAP2											YES
PPP1R1B									YES
ACSL3										YES
LMF1															YES
FRY									YES
HCN1							YES
ATAD1			YES
GSN																					YES
FAM160B2	YES
LZTR1																	YES
RPL13					YES
ASNS							YES
VEGFB		YES
SRCAP																								YES
CCT2										YES
RNR1														YES
GPT2																																				YES
AGAP3																	YES
ATG2B			YES
AXL									YES
DGKI											YES
SLC48A1		YES
SHANK1																	YES
KDM6B																								YES
PHC2																								YES
ANP32B								YES
ATP1B2									YES
PPARD															YES
SLC25A4				YES
MAPK4																							YES
RAB11FIP5												YES
POLR3H															YES
LZTS2		YES
PLEKHA1											YES
CBLN2					YES
RBFOX1				YES
BAG4					YES
AES																			YES
ATP6V0A1																											YES
IL4R																							YES
AP1B1												YES
CCT6A										YES
COL5A3																					YES
C10orf105																																				YES
MAL2							YES
KBTBD3				YES
CPLX2																									YES
HSPD1																															YES
LRP5																							YES
SOX13																					YES
WDR47				YES
SNN																					YES
PGPEP1		YES
COL1A2																							YES
NBEAL2	YES
MYRF																						YES
C1orf115					YES
RUFY3			YES
ANLN																																			YES
PSD2																					YES
PTPRN2																		YES
CCDC88B	YES
FASTK															YES
RPLP1																					YES
TSC22D4									YES
PHYHIP																		YES
MED16	YES
LRFN5					YES
PHACTR3		YES
ABHD8															YES
RAB11A			YES
FAM3C			YES
GSTP1									YES
FGFR1OP2											YES
BIN1																						YES
ABI2																								YES
CLSTN3																																	YES
TCFL5								YES
PER1															YES
NEURL1															YES
CUL9						YES
AMPH					YES
SCARB1																							YES
CPSF1	YES
FBXO31												YES
PRRC2B																								YES
DTNA																																					YES
ST8SIA3											YES
CNTN4											YES
KLF16												YES
CROCC															YES
DENND5A		YES
DBNDD1	YES
SH3BP2									YES
VPS50			YES
ANKRD9																					YES
GPAA1	YES
NEURL4																									YES
PDE1A											YES
DOCK3											YES
GUCD1									YES
ANK3																							YES
COPS8			YES
RAB6B				YES
PPM1L				YES
SHISA5																							YES
CISD1					YES
FAM102B											YES
ADCY5															YES
SYT16			YES
MT2A																					YES
HEPACAM																														YES
DOT1L																								YES
HDAC11									YES
PADI2																							YES
COPG2					YES
OXCT1											YES
ALDH2																																						YES
C9orf72				YES
DGKB																							YES
DDN																	YES
ABCA7						YES
ACTB																		YES
APBB1						YES
ARRDC2		YES
DEF8															YES
OTUD7B		YES
AEBP1																																				YES
IPW					YES
AGFG2																							YES
FBXO3																								YES
HID1															YES
NR1H2	YES
GAD2				YES
BHLHB9					YES
FCGRT																							YES
FAM107B																				YES
DACH2			YES
TRIM8																					YES
ARHGAP35																					YES
PC									YES
RAB11FIP4		YES
RYR2																							YES
1				YES
CDC42SE2																	YES
BCLAF1			YES
GGT5																					YES
C3orf14											YES
FAM163B												YES
PRELP																							YES
CRTAP		YES
CNTFR									YES
KLHL11											YES
TGM2																							YES
CDH18																							YES
IFT140															YES
PODXL																												YES
PCDH11Y																										YES
BTBD10			YES
IQCE												YES
GAK	YES
NES																					YES
DMXL1							YES
FBXO2															YES
ABCA5																					YES
CCSAP											YES
MICALL1																							YES
TNRC18	YES
LAMB2																					YES
SLC24A2											YES
COX6C				YES
GOT2					YES
FAM171A2																	YES
FAM234B				YES
ZGPAT						YES
PEX5L											YES
KCTD15									YES
RAB9B			YES
NDUFAF4										YES
RUSC2																									YES
NFIA																																					YES
COL7A1						YES
CAPN1	YES
PLEKHO2																					YES
AP2M1																											YES
CHMP1A															YES
FAIM2																		YES
RHOC									YES
KAT2A																								YES
SPOCK2																	YES
ITGB5									YES
ANO8	YES
HIGD1A																								YES
CREBBP							YES
EHBP1L1																							YES
KCNN1																			YES
SEPT8								YES
EHMT1																					YES
CLASP2			YES
NRN1				YES
BCAM																					YES
DLG2																							YES
MAPK11	YES
LLGL1																						YES
B3GALNT1																								YES
ELOVL4				YES
COPS2											YES
MAPKAPK2																							YES
METRN	YES
LINC00094															YES
FSTL5				YES
LHX2									YES
FGF14											YES
RAB3B				YES
UGCG											YES
CRAT	YES
SULT4A1																											YES
LIMK1															YES
PTPA					YES
FTH1		YES
MYO9B																						YES
CCDC85C																			YES
RPS15									YES
POLR2E						YES
ICAM5						YES
PTPN23															YES
NNT			YES
DNAJB2													YES
EVL																	YES
DENND1A															YES
SAMD14																			YES
KATNB1						YES
COX7B				YES
CLCN4				YES
NFE2L1																							YES
PAM			YES
AGAP1																								YES
FAM65C																							YES
ATXN1L		YES
NPDC1	YES
FTL									YES
PCSK6																				YES
NGEF																		YES
LNPK																								YES
DYNC1H1				YES
PTGES3																															YES
EDIL3																																		YES
NDRG3
RLIM																								YES
CAPN10	YES
FAM53B																							YES
LRRC8B							YES
FAM219A		YES
FH							YES
FAM134B				YES
BEX2							YES
KLF15																					YES
ARFGAP1												YES
NDRG4																																	YES
ARHGEF37								YES
OSBPL8										YES
MAMDC4	YES
FBRSL1												YES
NEFH																																								YES
CORO6																		YES
CSF1																							YES
BAIAP2																									YES
GRM5				YES
ATP13A1						YES
HECTD1											YES
ATP2B2																													YES
CHADL																						YES
PAPLN									YES
CDC27			YES
BBS7			YES
CPLX1																		YES
CDK19								YES
KANK1									YES
HACE1											YES
KRBA1	YES
OGFR	YES
DAPK3						YES
TRUB1			YES
1											YES
EGFR																							YES
MAG																						YES
GAA						YES
KIAA1522												YES
CSMD3																							YES
KCNH7											YES
HEATR5B			YES
MAGEE1					YES
ATXN7L3															YES
MINK1																	YES
HIST1H1E						YES
FAM89B												YES
SLC29A4																					YES
DGKE				YES
AGTPBP1																				YES
NUDT16								YES
NUCB1																	YES
KIAA0513																									YES
IFITM3									YES
CNR1					YES
ASB1		YES
PALD1															YES
PPA1				YES
C1QB						YES
CD200				YES
API5				YES
FRMD4B																				YES
DLGAP1											YES
C7orf50	YES
BAZ2A			YES
NKX6-2		YES
MIDN																					YES
FOXP4												YES
ENG																							YES
L1CAM																		YES
PRNP										YES
SIN3B						YES
ARHGEF11																	YES
ORC4				YES
KLHL7					YES
GOPC				YES
DOK6											YES
OGT		YES
PLXNB2	YES
CDK2AP1																					YES
DDA1		YES
MGAT4B																					YES
LINC01000																								YES
EDC4																									YES
CAPN2																							YES
CA10											YES
IRAK1	YES
OBSL1						YES
KRAS			YES
ADAMTS9																																									YES
CACNA1I																	YES
FAR1			YES
MORF4L1																								YES
ANAPC2						YES
TMEM8B									YES
CYB5R3												YES
CDKL2											YES
COL9A2		YES
FARSB			YES
NPTX2																																YES
SOX2-OT																																		YES
RPS6								YES
GPR162						YES
CCDC57																									YES
GRAMD3																																					YES
MAR7				YES
ATP11A		YES
IL17D									YES
ATXN7L3B							YES
ACBD7									YES
HMG20B		YES
ZC3H13																				YES
SSFA2								YES
CNTNAP5																							YES
HDAC7															YES
KCNH5					YES
MSI2																														YES
PRKCI				YES
CFL2			YES
11					YES
MVB12B		YES
SCYL1												YES
CNTN5											YES
ADAMTS10															YES
ADAM11	YES
S1PR1									YES
C16orf52											YES
AP2A1						YES
FAM69A				YES
CTXN1																	YES
KDM4B															YES
SCG3				YES
ARHGAP39						YES
LPGAT1			YES
PHF14																			YES
ACSBG1									YES
ATR											YES
GGA1	YES
PARD3																														YES
SCARB2			YES
H6PD																					YES
OLIG1		YES
LONP1	YES
DPP8			YES
KIAA0556	YES
DNM1																																	YES
SNCB																		YES
HSF1												YES
SYMPK																	YES
FAM81A											YES
IMPAD1				YES
ASPHD1																						YES
PIK3CB				YES
NKIRAS1										YES
SLC41A1																					YES
ATP5G3				YES
C19orf68		YES
AGT																																				YES
ERLEC1			YES
HDAC4																								YES
WNK2						YES
DGCR6L												YES
MGAT3															YES
PPM1A																	YES
RNPEPL1																						YES
SFXN5									YES
HS6ST1												YES
CANX										YES
MID1IP1		YES
PITPNC1																														YES
SMARCD3																	YES
LRCH4															YES
IGDCC4									YES
TCF3																					YES
CDK16															YES
SCAMP4									YES
LZTS1												YES
PRKAR1B																		YES
GDF11									YES
SV2A																											YES
CYP51A1										YES
BEX5			YES
DYNLL1										YES
PTH1R																					YES
KBTBD6				YES
CHD7								YES
ERBB2									YES
RPLP2									YES
PARD6G-AS1													YES
MBNL2	YES
ZC3H7B															YES
RHOB									YES
ATP2C1										YES
SRRM2																								YES
RAP1GAP																									YES
CSNK1D																					YES
KCNB1					YES
PPP1R26	YES
PPP1R12A					YES
CRYM																											YES
EZR																					YES
MIR4697HG																																YES
ABCE1			YES
CSE1L				YES
CRIP2																	YES
GLO1			YES
MAP7																				YES
NEUROD6							YES
BGN					YES
RASA1											YES
CDH23																							YES
RASSF2								YES
DZIP3											YES
C12orf4				YES
NDUFV2			YES
PTTG1IP																														YES
LINC00982									YES
ADGRB3																							YES
FRMD8																						YES
CASC3								YES
SPEN							YES
AGPAT3									YES
BRWD1																																							YES
FOXRED2																					YES
DLG3					YES
MYEF2				YES
PTER				YES
ITGB4																																				YES
PLPPR4							YES
GRIA4											YES
CX3CL1																	YES
TOMM70							YES
ACTN1																		YES
EPAS1									YES
IQSEC3												YES
CCT8											YES
RBCK1									YES
AHNAK2																		YES
LRRN3											YES
ABCB8															YES
HDGF																							YES
CFL1																		YES
CDK10						YES
NOXA1						YES
MDGA1																					YES
KLHL21												YES
ROCK2											YES
ATG4B																									YES
AK4																																										YES
ALAD		YES
CHST3																							YES
GRAMD4																					YES
LRRC32																					YES
REEP2															YES
C3orf70																														YES
MUS81																					YES
EMC10									YES
CLMN																																			YES
SLC25A40			YES
FAM167A																					YES
EPHB4									YES
IGSF9B																																YES
ADCY3																			YES
MED15												YES
CLDND1																																			YES
ANKRD24																		YES
AAK1											YES
MAPK6			YES
SLC2A1																							YES
ARHGAP1									YES
TNPO2															YES
NUAK1					YES
NDUFB5			YES
CDK17			YES
GNB2	YES
C16orf72			YES
2					YES
PRPS2										YES
CMIP																		YES
CALB1											YES
DDIT4													YES
APLN																					YES
ATF2											YES
DHX9											YES
PIGK			YES
EXTL1															YES
PSD3											YES
CCT5										YES
SAMD4B																			YES
OLA1							YES
MAT2B										YES
GCN1																								YES
CACNA1B																		YES
MVD						YES
GRSF1			YES
TMEM132A	YES
C17orf62									YES
PCSK1N						YES
DNAJB4																YES
NECAB3																		YES
PDE2A																									YES
TBC1D24												YES
CCT3																YES
MSN									YES
NPRL3												YES
EML3																																				YES
IGFBP5																					YES
TF																																			YES
AMER2																																			YES
ACOT7																		YES
CSK												YES
GATS																				YES
ARHGEF3											YES
GABRA2																						YES
BTRC			YES
CHRM2				YES
KIF21A			YES
LINGO2											YES
FLII	YES
DNM2											YES
MTA1																						YES
MCTP1											YES
SLC12A5																													YES
SCOC			YES
SGTA												YES
KIAA0368																					YES
SLC35F6									YES
COX7A2L											YES
RHOBTB2																	YES
CPT1A																							YES
SLC2A13							YES
C1QL3				YES
FAM19A5		YES
ADGRD1																					YES
CORO1B												YES
STARD3									YES
GPR17																					YES
SPATA13		YES
NAV2				YES
NCAN									YES
C2CD5											YES
AKNA				YES
RALYL					YES
FA2H																						YES
SNX8		YES
SLC17A7																	YES
HLTF			YES
ARID1A																					YES
PTPRT					YES
RPE			YES
CCM2															YES
MGAT1												YES
AP5M1											YES
CHPF	YES
C1orf61									YES
OPRM1											YES
ACOT11									YES
COPE												YES
HSPG2																							YES
IMPA1											YES
SERINC3			YES
COL27A1												YES
MYO1C																							YES
CUEDC1												YES
ATP5D						YES
PEG10											YES
BRICD5	YES
KPNA1					YES
KCNIP4-IT1					YES
TBC1D9				YES
EPRS			YES
DAP									YES
CAMKK1																									YES
MFSD12															YES
ARRDC1	YES
BASP1																																					YES
MIR612																							YES
SORL1							YES
STON2																														YES
CLSTN2				YES
MLXIPL																	YES
PCDH7					YES
ADCY2																														YES
LINGO1																	YES
HOOK1											YES
RTN4			YES
CACNA2D3					YES
MOB3A					YES
RPL13AP5									YES
GAS2L1									YES
CYHR1																			YES
BRD3									YES
GPD1L				YES
CHML				YES
CLCN3	YES
ARFRP1																					YES
EMP2																												YES
TLE2												YES
D2HGDH	YES
FAM193A				YES
ARMC5						YES
PREX2																														YES
FBXO34										YES
DUS1L															YES
RBFOX3																									YES
SAMD4A																							YES
MKL2								YES
FBXO11											YES
MRPL3				YES
CLSTN1																																	YES
SPTBN4																		YES
LRP12				YES
MRAP2					YES
CDK9															YES
LGALS3BP																						YES
RNU2-2P										YES
MAFK		YES
TSPYL4				YES
SRRM3						YES
EHD2											YES
MTMR3							YES
BLOC1S6			YES
FMNL3					YES
KCNJ10																																										YES
DYNC1LI1							YES
MYH14	YES
SNX33																							YES
KLHL26	YES
GPR137C											YES
RBMS2																					YES
HELZ2																							YES
LRFN4																					YES
AMPD2																			YES
CDR2L		YES
LMNB2	YES
RNF187						YES
AFTPH															YES
JAZF1				YES
MTX2			YES
DENND5B											YES
PLEKHA6												YES
ESD											YES
CYBRD1																														YES
GPAM									YES
SYT2																																								YES
ZNF358																			YES
ATL2											YES
EIF2S1			YES
SELO						YES
ITGB8																																								YES
MVP	YES
ACTR3											YES
FRS3																	YES
GFPT1				YES
KCNMA1					YES
ANKRD52															YES
C11orf58			YES
GLOD4
APPBP2											YES
MAPRE2											YES
UBLCP1			YES
COL4A1																																				YES
P4HA1																															YES
SKI																					YES
C15orf52			YES
SREBF2															YES
RNF6										YES
COX7A2										YES
ASPSCR1	YES
ADD2																																	YES
RANGAP1						YES
SLC44A1																																			YES
CABP1																		YES
NDUFAB1			YES
KIAA1614															YES
IDS											YES
CYTH3												YES
CCND3																							YES
FAT1																												YES
GSKIP				YES
CACNA1A																		YES
GABBR2					YES
GRK3					YES
ALCAM																																		YES
ACSL6					YES
CALM3																																	YES
AP3S1			YES
COL5A1															YES
PDS5B												YES
FAM168A					YES
LMBRD1			YES
SETD1A												YES
PDCD6IP				YES
ACADVL																								YES
PSIP1					YES
SERTM1				YES
NRGN																		YES
MICAL3																								YES
NECTIN1															YES
COL4A2						YES
GLMN			YES
CDH13				YES
METTL7A																							YES
ACVRL1																					YES
CARHSP1																							YES
LCNL1																					YES
KITLG							YES
MRAS																					YES
MARCKSL1									YES
FAAP100	YES
MAP1A																																	YES
DTX3																			YES
GLI3									YES
WWC3		YES
ARHGAP45	YES
MAP2K1																											YES
NDUFS1				YES
NFATC4																					YES
KCNA1											YES
GAS6						YES
PAPSS1											YES
MAP3K7											YES
CEBPG																YES
PEAR1																							YES
CDH5																							YES
KIAA1456							YES
E4F1						YES
PDE8A																				YES
WNK1								YES
PKN3																							YES
RFX4																																					YES
CLIP3						YES
SHISA4									YES
MED22												YES
KIF21B															YES
MCTS1			YES
TTBK2											YES
SLC9A3R1	YES
GLUD1																																						YES
ATG9A																	YES
AVL9				YES
PLEKHG3																					YES
EFHD1								YES
FAM131A						YES
LINC01105																																			YES
SCNN1D						YES
KIF3C																													YES
ALDH6A1																																						YES
TUBB3																		YES
PTOV1																	YES
PPFIA4																									YES
FAM217B					YES
HSF4																	YES
HGS																	YES
RUSC1																		YES
CCP110																																			YES
C2orf80			YES
MRPS6																YES
CAPRIN1																					YES
FMNL1															YES
TBL1XR1																								YES
SARS					YES
ZMIZ2																			YES
PSMA1				YES
FMNL2								YES
SLC45A4												YES
RANBP9											YES
GSTA4				YES
PREP					YES
ASAP3									YES
MAPK1																						YES
FLRT3											YES
ITIH5																												YES
ALDH1L1									YES
NT5DC2									YES
GNPTG															YES
AGL											YES
GALNT9						YES
LETM1												YES
DENND6B																	YES
RASAL2					YES
NAA60																			YES
CRBN			YES
KANK3																					YES
LPP																																					YES
ATP6AP1																																	YES
EXOC7															YES
GPR155											YES
ATXN2L															YES
SLC16A7							YES
CHDH																					YES
MAST1																									YES
BMPR1B																														YES
CFLAR				YES
NR1D2										YES
ST6GALNAC5											YES
ALPL																							YES
CHST1																	YES
RAB31									YES
NRIP3				YES
AP2B1											YES
EPHA7											YES
ABTB2																							YES
CAMKV																																	YES
APBA1						YES
KHNYN																							YES
GJA1																														YES
RNF44												YES
RNY1		YES
DDX54															YES
BCL6B																												YES
FBLN1																							YES
FAM199X			YES
PCNT																									YES
PYGB																	YES
ALS2																					YES
COPG1																											YES
LIMD1																							YES
GPIHBP1		YES
HMBOX1																																					YES
NEDD4L																					YES
BPTF								YES
FRYL																																											YES
BEX3																											YES
CDC5L										YES
AP1M1						YES
LRRTM3					YES
ASRGL1									YES
PLXNA2															YES
MICU1				YES
MFNG									YES
CUX1			YES
CDH12					YES
HHIPL1	YES
C19orf47																					YES
RACK1											YES
RANBP3												YES
CYP4X1							YES
EXTL2				YES
GLTSCR1												YES
RANBP2		YES
FGD5-AS1																											YES
SLC27A1																					YES
PELP1	YES
RREB1									YES
CAPZA2			YES
RAB1B												YES
ARL6IP4						YES
ROBO4												YES
EIF1B											YES
FLNB																						YES
FGFR2								YES
GIPC1																	YES
ATP2B3																		YES
NELL1					YES
IREB2							YES
SEMA3B				YES
FLNC		YES
PPP1R9B																			YES
SPTB																		YES
ACO2																	YES
FKBP10									YES
FXYD1									YES
EPHX1																														YES
CDH9							YES
OSBPL6							YES
RPS19												YES
KCNJ9		YES
SEC16A												YES
CYCS										YES
EXTL3															YES
ADAMTS1																																									YES
FNBP1								YES
HIVEP3																								YES
FAM19A1											YES
FBRS																					YES
HNRNPK												YES
ACBD4																	YES
PEX5		YES
STT3B															YES
MPND															YES
HK1																											YES
SEMA4B									YES
MLST8	YES
CHST6																							YES
FGD5																							YES
C14orf166																								YES
MYBBP1A						YES
COTL1					YES
LOXHD1																																YES
HHIP																																		YES
PLOD1													YES
NOVA1																					YES
AP5B1	YES
DNAH17																				YES
MEST							YES
LNPEP															YES
DOPEY1																																												YES
DENND3																	YES
EFEMP2									YES
PDGFB		YES
DCUN1D4																								YES
CACNA1E																					YES
CNST										YES
HSDL1							YES
HIC2																	YES
FGFR1													YES
GPER1																					YES
EML5												YES
RGS11						YES
RSPO2											YES
ASPA																				YES
PTPN5																		YES
GRN																					YES
ATP5F1			YES
AMER3																		YES
DCAKD					YES
FOXN3																							YES
ATP11B									YES
FAM63A																							YES
PIGQ	YES
STAT4							YES
CPD											YES
PAK4																					YES
MUM1	YES
KIAA1755																					YES
GPSM2								YES
ENAH								YES
PIEZO2																																			YES
ARHGAP21																				YES
CD151																					YES
RPL28											YES
ANTXR1																												YES
NARFL															YES
LASP1																					YES
PPP1R16A	YES
CECR2								YES
FAM3A																					YES
CDIPT																					YES
UBR3											YES
PALLD													YES
STRN4															YES
KCNA3											YES
PNPLA7	YES
SDF4															YES
CHD4		YES
MYOM1								YES
FAM19A2					YES
OCRL							YES
DNAJC10			YES
ELK1																	YES
RFPL1S																											YES
MAFG									YES
ARHGEF15																							YES
GTPBP10										YES
JDP2													YES
ARAP2																																											YES
NINL	YES
SEL1L				YES
CAMSAP3						YES
ADD3																														YES
AP5Z1						YES
AGO2					YES
DPYSL5																						YES
SRRT	YES
BEND6											YES
CPNE4				YES
ABHD17A																					YES
MBD6																						YES
SH3GLB2																	YES
MAPK8				YES
PAPOLA																YES
SPTAN1																											YES
GTF3C1						YES
AHCYL1																																				YES
CIZ1															YES
ABTB1															YES
LGI3																		YES
ETFB	YES
RNF40												YES
ADGRA3																												YES
MTX3					YES
ENPP5																								YES
COL4A3BP										YES
ANKIB1								YES
ATP2A2				YES
EFCAB14		YES
TEAD1																																					YES
RFX3												YES
ENTPD2																																				YES
CACNB3																									YES
MECP2												YES
EIF3A																				YES
BNIP3L				YES
NDST3											YES
PPP1R2			YES
ABCA1									YES
NCR3LG1											YES
TBKBP1												YES
PIN1																		YES
LFNG									YES
ATP5H				YES
GNAS																																	YES
JADE2																			YES
ATP5L											YES
FAM8A1				YES
MXI1																											YES
SLC19A1											YES
IMPDH1																	YES
CCDC6					YES
KREMEN1				YES
CHPF2																									YES
BTBD6															YES
HEG1									YES
ERF	YES
FAM20B				YES
RCN2			YES
CBLN4							YES
SIPA1L3												YES
RGS7											YES
ARMCX3				YES
TFEB		YES
NSMF																					YES
CTNS																						YES
AHI1																																												YES
RHOU								YES
ATCAY																													YES
AP1G1															YES
LOC100506548								YES
TMEM201															YES
HSPA9																						YES
PCED1A																					YES
ARHGAP20				YES
LAMB3																																YES
SLC9A6				YES
C15orf39											YES
NATD1											YES
CDC14B																				YES
EIF5A2			YES
USP33			YES
SHC1													YES
CHM			YES
ANO2																							YES
PKI55				YES
EPHA2		YES
EPM2AIP1											YES
BCL6																					YES
CCSER1											YES
PANK3							YES
PIANP																									YES
BOD1L1																																											YES
HOMER1							YES
SCN3B								YES
ADCY1																													YES
SLC25A39																					YES
CACTIN						YES
KIF13A									YES
LIPE		YES
FARSA																	YES
GDI2			YES
APLP1																						YES
PTP4A2								YES
PPP1R13L		YES
RSL24D1										YES
GFM1			YES
ATM																																													YES
LEPROTL1					YES
MKKS					YES
C6orf1														YES
KIT							YES
FAM20C	YES
MAPKBP1																									YES
PPIA					YES
MFSD6				YES
ID4																														YES
DDRGK1						YES
ISCU					YES
VPS13A					YES
CUL5																								YES
LRP11				YES
MON1B												YES
ILF3											YES
OAF																							YES
DOK7												YES
PQLC1												YES
LRP2																																			YES
EVC									YES
PURG			YES
NEIL1						YES
DDR2																																														YES
CPTP															YES
RHOT1											YES
SLF1											YES
FARP1																														YES
DCTN4			YES
PEA15					YES
PANK1							YES
LTN1																								YES
XIST																										YES
KCNA4					YES
ERC1					YES
PHF19		YES
DCP2										YES
LIMS2																					YES
PPIG												YES
CLEC16A																								YES
PMPCB									YES
SEMA4C	YES
ARHGDIG						YES
SLC9A7					YES
DIEXF							YES
BTBD3											YES
RPS16		YES
LGI4											YES
TIE1																					YES
ARHGEF2																						YES
HDLBP											YES
SNCG																		YES
NPY1R											YES
FOSL2																					YES
IP6K1												YES
CAPZA1																								YES
RPAP1															YES
CC2D1B												YES
RASL10B												YES
ANKMY2			YES
CORO1A						YES
CSMD1									YES
ADORA1		YES
LAMP5				YES
2																		YES
MYL12B										YES
NEDD8				YES
KIAA1468							YES
FAM57B	YES
MLKL													YES
R3HDM1									YES
CEP131	YES
ID3																							YES
CTDNEP1		YES
CDC37																		YES
FXR1																YES
IL6R																							YES
NPHP4															YES
BCL2L1																			YES
ENGASE																								YES
PARD6A																			YES
ITPRIP																					YES
CEP250																						YES
COL20A1																					YES
C1QC						YES
C2orf72		YES
SERPINA3																																				YES
TFE3																					YES
[truncated: 13,347 more rows]
[truncated: 239 more columns]
